# Supplementary material for: Membrane estrogen receptor alpha (ERα) participates in flow-mediated dilation in a ligand-independent manner
Source: eLife journal article supplement (doi:10.7554/elife.68695), 2021-11-29
Supplement: supp [file elife-68695-supp-v1.zip]

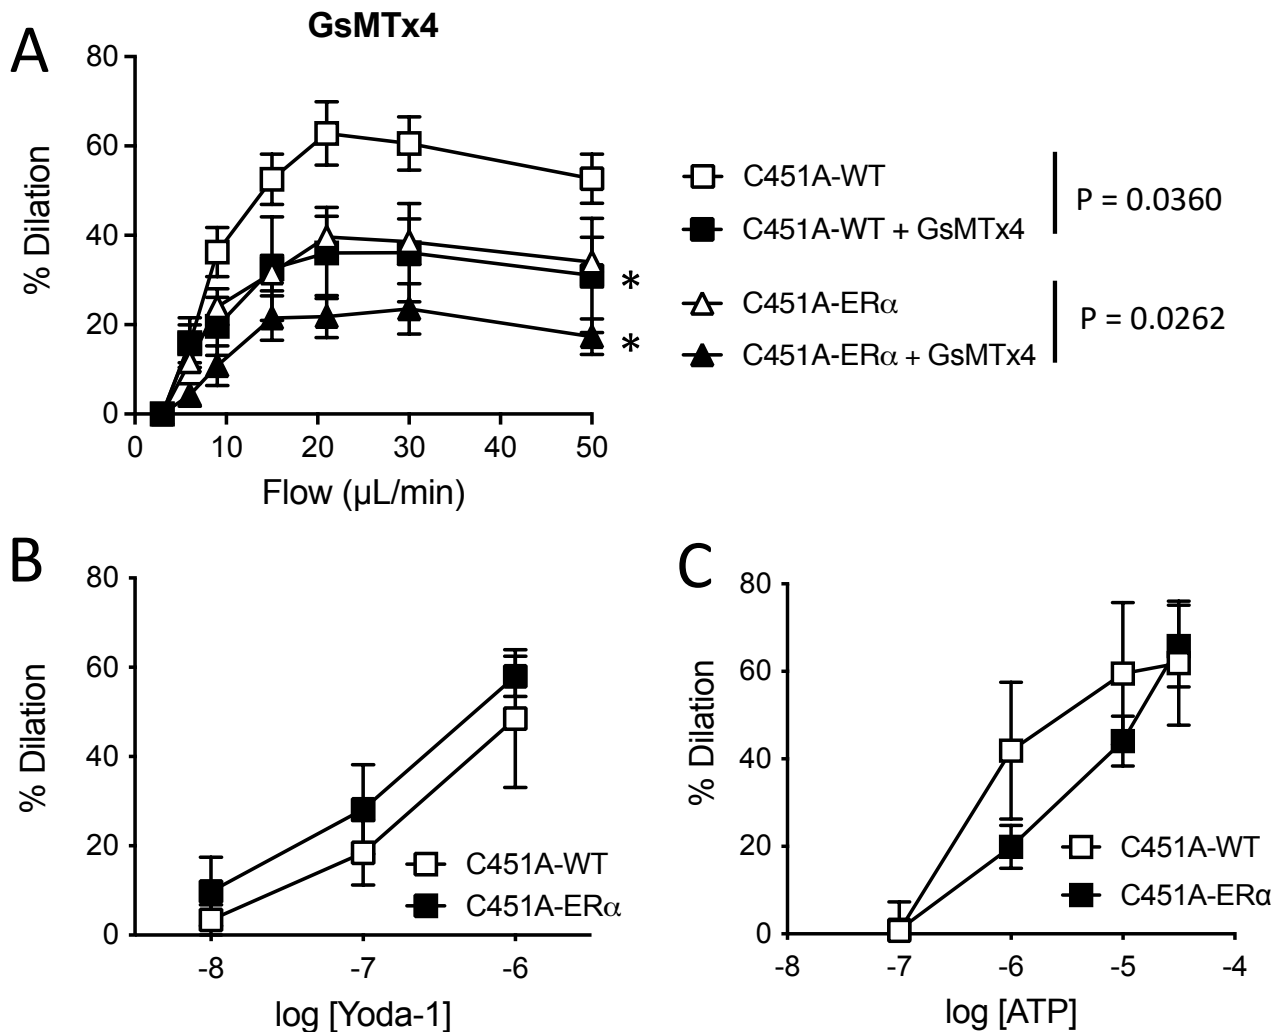

**Figure 7: figure supplement 3: Mechanosensitive channels and ATP in FMD**

Flow-mediated dilation (FMD) was determined in pressurized mesenteric resistance arteries isolated from male C451A-WT and C451A-ER $\alpha$  (A) mice before and after addition of the mechanosensitive channel blocker GsMTx4 (50  $\mu\text{M}$ , 45 minutes). In the same groups a concentration response curve to Yoda-1 and ATP $\gamma\text{S}$  (ATP) (C) was performed. Means  $\pm$  the SEM are shown ( $n = 3$  to 9 per group, see source data for details).

\*Two-way ANOVA for repeated measurements (NS: panels B and C).
