# Supplementary material for: Membrane estrogen receptor alpha (ERα) participates in flow-mediated dilation in a ligand-independent manner
Source: eLife journal article supplement (doi:10.7554/elife.68695), 2021-11-29
Supplement: supp [file elife-68695-supp-v1.zip]

Archive with 19 entries (19 files):
- elife_poa_e68695_Transparent_Reporting_File.docx
- elife_poa_e68695_Figure_1_source_data_1.xlsx
- elife_poa_e68695_Figure_2_source_data_1.xlsx
- elife_poa_e68695_Figure_3_source_data_1.xlsx
- elife_poa_e68695_Figure_4_source_data_1.xlsx
- elife_poa_e68695_Figure_4_source_data_2.xlsx
- elife_poa_e68695_Figure_5_source_data_1.xlsx
- elife_poa_e68695_Figure_5_source_data_1.pdf
- elife_poa_e68695_Figure_6_source_data_1.xlsx
- elife_poa_e68695_Figure_7_source_data_1.xlsx
- elife_poa_e68695_Figure_7_source_data_2.xlsx
- elife_poa_e68695_Figure_7_source_data_3.xlsx
- elife_poa_e68695_Figure_8_source_data_1.xlsx
- elife_poa_e68695_Supplementary_file_1.docx
- elife_poa_e68695_Figure_3_figure_supplement_1.pdf
- elife_poa_e68695_Figure_4_figure_supplement_1.pdf
- elife_poa_e68695_Figure_7_figure_supplement_1.pdf
- elife_poa_e68695_Figure_7_figure_supplement_2.pdf
- elife_poa_e68695_Figure_7_figure_supplement_3.pdf
