# Supplementary material for: Membrane estrogen receptor alpha (ERα) participates in flow-mediated dilation in a ligand-independent manner
Source: eLife journal article supplement (doi:10.7554/elife.68695), 2021-11-29
Supplement: supp [file elife-68695-supp-v1.zip › elife_poa_e68695_Figure_1_source_data_1.xlsx]

## Sheet: Feuil1
	Data and statistical analysis from experiments plotted in Figure 1B to M
	Figure 1 panel B
	FLOW	% dilation	Esr1+/+										% dilation	Esr1-/-
	3	0	0	0	0	0	0	0	0	0	0		0	0	0	0	0	0	0	0	0	0	0	0	0	0	0	0	0	0	0	0	0
	6	16.026	9.211	4.706	0	-7.843	14.286	0	24.176	16.901	9.677		13.684	13.158	0	21.552	22.727	2.941	0	7.752	4.065	16.038	2.29	0.885	10.811	1.961	7.955	0	9.901	1.681	8.547	11.4035	7.143
	9	46.795	17.105	12.941	20.313	11.765	31.746	9.639	32.967	39.437	17.204		32.632	17.105	2.941	33.621	29.545	7.353	2.247	20.93	16.26	23.585	4.58	7.965	31.081	9.804	10.227	0	34.653	4.202	17.094	21.0526	12.245
	15	48.077	32.895	41.176	37.5	27.451	57.143	19.277	26.374	57.746	22.581		43.158	35.526	13.235	50.862	32.955	13.235	-2.247	26.357	23.577	31.132	20.611	11.504	40.541	21.569	18.182	33.333	26.733	15.966	30.769	27.193	6.122
	21	55.769	46.053	51.765	56.25	41.176	65.079	33.735	49.451	98.592	50.538		62.105	40.789	20.588	60.345	31.818	17.647	4.494	41.085	26.016	39.623	60.305	21.239	60.811	41.176	30.682	25.203	42.574	23.529	37.607	38.5965	4.082
	30	61.538	53.947	56.471	59.375	56.863	71.429	42.169	58.242	102.817	66.667		71.579	43.421	30.882	64.655	31.818	20.588	7.865	45.736	43.089	42.453	89.313	14.159	78.378	44.118	34.091	35.772	28.713	23.529	44.444	46.4912	4.082
	50	65.385	31.579	61.176	54.688	78.431	68.254	42.169	53.846	98.592	54.839		74.737	36.842	45.588	63.793	32.955	25	7.865	42.636	45.528	35.849	47.328	21.239	87.838	37.255	37.5	34.146	24.752	26.891	41.88	48.2456	11.224
	Two-way RM ANOVA	Matching: Stacked
	Assume sphericity?	No
	Alpha	0.05
	Source of Variation	% of total variation	P value	P value summary	Significant?	Geisser-Greenhouse's epsilon
	flow x Column Factor	3.138	<0,0001	****	Yes
	flow	58.15	<0,0001	****	Yes	0.3748
	Column Factor	5.877	0.0072	**	Yes
	Subject	20.37	<0,0001	****	Yes
	ANOVA table	SS	DF	MS	F (DFn, DFd)	P value
	flow x Column Factor	3747	6	624.4	F (6, 174) = 6,254	P<0,0001
	flow	69432	6	11572	F (2,249, 65,21) = 115,9	P<0,0001
	Column Factor	7017	1	7017	F (1, 29) = 8,365	P=0,0072
	Subject	24327	29	838.9	F (29, 174) = 8,402	P<0,0001
	Residual	17373	174	99.84
	Difference between column means
	Mean of Esr1+/+ 6m (9)	35.49
	Mean of Esr1-/- 6m (8)	23.32
	Difference between means	12.16
	SE of difference	4.206
	95% CI of difference	3,562 to 20,77
	Data summary
	Number of columns (Column Factor)	2
	Number of rows (flow)	7
	Number of subjects (Subject)	31
	Number of missing values	0
	Figure 1, panel C	Phenylephrine precontraction				Figure 1, panel D		Diameter
		Esr1+/+	Esr1-/-					Esr1+/+	Esr1-/-
		53.1073	44.2953					264	298
		38.843	33.1361					218	253
		55.3846	53.7972					277	169
		52.1503	28.2051					256	282
		43.1107	21.7822					198	189
		61.1359	49.6009					290	182
		49.2921	54.0107					288	187
								289	297
		Mann-Withney						336	297
		Column B	Esr1+/+
		vs.	vs,					Mann-Withney
		Column A	Esr1-/-					Column H	Esr1+/+
								vs.	vs,
		Mann Whitney test						Column B	Esr1-/-
		P value	0.2593
		Exact or approximate P value?	Exact					Mann Whitney test
		P value summary	ns					P value	0.4338
		Significantly different? (P < 0.05)	No					Exact or approximate P value?	Exact
		One- or two-tailed P value?	Two-tailed					P value summary	ns
		Sum of ranks in column A,B	43 , 62					Significantly different? (P < 0.05)	No
		Mann-Whitney U	15					One- or two-tailed P value?	Two-tailed
								Sum of ranks in column B,H	80 , 110
		Difference between medians						Mann-Whitney U	35
		Median of column A	44,30, n=7
		Median of column B	52,15, n=7					Difference between medians
		Difference: Actual	7.855					Median of column B	253,0, n=9
		Difference: Hodges-Lehmann	7.855					Median of column H	272,5, n=10
								Difference: Actual	19.5
								Difference: Hodges-Lehmann	26.5
	Figure 1 panel E
	Acetylcholine (LogM)	% dilation	WT																		Acetylcholine (LogM)	% dilation	Eralpha -/-
	-9	9.423	6.24	2.372	2.404	-1.017	4.643	0.761	2.094	7.778	4.111	5.598	2.833	5.249	5.277	3.783	3.939	3.91	-4.306		-9	5.723	4.067	4.03	8.264	3.462	0.249	2.571	10.714	5.699	3.774	9.2	2.248
	-8	11.423	10.254	5.528	-2.902	4.317	19.86	5.605	10.175	18.889	7.079	15.835	2.426	6.776	14.587	7.718	3.481	13.841	6.188		-8	6.652	1.579	7.967	21.051	11.17	4.99	1.293	13.274	9.846	9.217	22.145	4.904
	-7	52.194	13.669	26.151	6.6	7.721	38.43	29.441	25.614	45.556	27.383	59.182	32.405	6.281	18.361	54.5	17.926	71.831	71.882		-7	25.093	51.17	19.64	15.235	34.097	11.95	36.726	37.209	25.966	12.922	30.347	11.916
	-6	72.091	20.35	60.319	41.523	65.588	57.586	78.192	46.232	84.444	54.509	72.962	47.516	14.585	40.577	93.047	79.312	95.688	97.035		-6	64.186	100.623	53.159	52.723	78.304	69.107	48.496	34.139	70.18	24.852	23.754	28.002
	-5	80.426	39.752	83.744	50.584	94.549	94.267	100.794	65.534	92.222	57.923	94.257	84.479	41.451	48.656	100.203	82.949	97.556	100.824		-5	88.961	104.295	69.558	62.512	83.983	78.296	78.135	51.736	84.531	32.33	26.35	42.597
	Two-way RM ANOVA	Matching: Stacked
	Assume sphericity?	No
	Alpha	0.05
	Source of Variation	% of total variation	P value	P value summary	Significant?	Geisser-Greenhouse's epsilon
	ACh x Column Factor	0.5731	0.2424	ns	No
	ACh	61.73	<0,0001	****	Yes	0.4456
	Column Factor	0.9491	0.1488	ns	No
	Subject	13.88	<0,0001	****	Yes
	ANOVA table	SS	DF	MS	F (DFn, DFd)	P value
	ACh x Column Factor	1044	4	261.1	F (4, 128) = 1,386	P=0,2424
	ACh	112474	4	28118	F (1,783, 57,04) = 149,3	P<0,0001
	Column Factor	1729	1	1729	F (1, 32) = 2,188	P=0,1488
	Subject	25288	32	790.3	F (32, 128) = 4,195	P<0,0001
	Residual	24110	128	188.4
	Difference between column means
	Mean of WT Bl6J	38.96
	Mean of Esr1-/-	32.29
	Difference between means	6.674
	SE of difference	4.512
	95% CI of difference	-2,516 to 15,86
	Data summary
	Number of columns (Column Factor)	2
	Number of rows (ACh)	5
	Number of subjects (Subject)	34
	Number of missing values	0
	Figure 1 panel F
	Insulin (LogM)	% dilation	WT						Insulin (LogM)	% dilation	Eralpha -/-
	-9	1.5873	8.103	14.8568	10.75	6.42	1.46		-9	5.0209	6.46465	12.633	18.2662	17.8419	10.3671	9.95127
	-8	5.55556	14.831	21.0726	16.13	9.17	13.14		-8	11.0866	8.28283	21.3857	28.87	25	26.8849	18.2659
	-7	17.3452	24.2563	31.5123	19.35	26.61	24.09		-7	22.3996	18.2828	30.5026	35.4747	33.084	40.2778	21.3706
	-6	24.9794	26.2797	41.7255	46.24	24.77	29.2		-6	30.6652	21.6162	37.127	47.6006	55.1282	49.2311	33.7519
	Two-way RM ANOVA	Matching: Stacked
	Alpha	0.05
	Source of Variation	% of total variation	P value	P value summary	Significant?
	Interaction	0.21	0.811	ns	No
	insulin	62	< 0,0001	****	Yes
	Column Factor	5.2	0.1564	ns	No
	Subjects (matching)	25	< 0,0001	****	Yes
	ANOVA table	SS	DF	MS	F (DFn, DFd)	P value
	Interaction	18	3	5.8	F (3, 33) = 0,32	P = 0,8110
	insulin	5123	3	1708	F (3, 33) = 93	P < 0,0001
	Column Factor	426	1	426	F (1, 11) = 2,3	P = 0,1564
	Subjects (matching)	2027	11	184	F (11, 33) = 10	P < 0,0001
	Residual	603	33	18
	Number of missing values	0
	Figure 1 panel G
	SNP (LogM)	% dilation	WT					SNP (LogM)	% dilation	Eralpha -/-
	-9	2.7027	9	8	0	0		-9	7.31707	3	15	4	1
	-8	6.75676	22	12	4	1		-8	9.7561	14	33	21	2
	-7	25.6757	36	43	29	17		-7	24.3902	35	55	43	17
	-6	37.1622	76	59	44	28		-6	34.1463	57	78	58	28
	-5	47.2973	90	68	67	36		-5	47.561	66	88	67	36
	Two-way RM ANOVA	Matching: Stacked
	Alpha	0.05
	Source of Variation	% of total variation	P value	P value summary	Significant?
	Interaction	0.2592	0.8469	ns	No
	SNP	71.97	< 0,0001	****	Yes
	Column Factor	0.3596	0.7232	ns	No
	Subjects (matching)	21.37	< 0,0001	****	Yes
	ANOVA table	SS	DF	MS	F (DFn, DFd)	P value
	Interaction	82.33	4	20.58	F (4, 32) = 0,3430	P = 0,8469
	SNP	22863	4	5716	F (4, 32) = 95,25	P < 0,0001
	Column Factor	114.2	1	114.2	F (1, 8) = 0,1346	P = 0,7232
	Subjects (matching)	6788	8	848.5	F (8, 32) = 14,14	P < 0,0001
	Residual	1920	32	60.01
	Number of missing values	0
	Figure 1 panel H
	FLOW	% dilation	WT													FLOW	% dilation	WT + ICI 182 780
	3	0	0	0	0	0	0	0	0	0	0	0	0	0		3	0	0	0	0	0	0
	6	14.8515	13.9535	12.0968	22.2222	24.176	16.9014	9.677	12	6.122	-4.054	4.688	17.117	5.143		6	9.375	14.2857	-3.92157	14.6067	17.8571	8.95522
	9	15.8416	40.3101	0	37.037	32.967	39.4366	17.204	10.667	18.367	9.459	17.188	27.027	8.571		9	12.5	14.2857	27.451	25.8427	28.5714	25.3731
	15	25.7426	36.4341	33.0645	64.8148	26.374	57.7465	22.581	25.333	37.755	31.081	34.375	34.234	31.429		15	21.0938	36.5079	25.4902	37.0787	46.4286	37.3134
	21	29.703	42.6357	39.5161	88.8889	49.451	98.5915	50.538	44	44.898	93.243	65.625	45.045	40.571		21	45.3125	44.4444	35.2941	43.8202	66.0714	67.1642
	30	41.5842	54.2636	50	87.037	58.242	102.817	66.667	64	52.041	74.324	79.688	51.351	38.857		30	47.6562	60.3175	47.0588	42.6966	66.0714	85.0746
	50	45.5446	56.5891	52.4194	62.963	53.846	98.5915	54.839	56	44.898	51.351	57.813	63.063	38.857		50	53.125	44.4444	49.0196	28.0899	83.9286	85.0746
	FLOW	% dilation	WT + E2													FLOW	% dilation	WT + E4
	3	0	0	0	0	0	0	0								3	0	0	0	0
	6	1.11111	13.924	19.697	10.6061	10.976	5.882	7.921								6	17.172	9.375	8.889	11.765
	9	10	2.53165	13.6364	15.1515	24.39	19.608	9.901								9	31.313	28.125	20	27.059
	15	36.6667	5.06329	53.0303	21.2121	54.878	23.529	24.752								15	46.465	53.125	40	34.118
	21	65.5556	43.038	66.6667	24.2424	69.512	42.157	54.455								21	45.455	62.5	61.111	40
	30	63.3333	51.8987	81.8182	31.8182	84.146	57.843	69.307								30	61.616	59.375	61.111	48.235
	50	65.5556	15.1899	95.4545	31.8182	82.927	51.961	59.406								50	45.455	53.125	54.444	27.059
	Two-way RM ANOVA	Matching: Stacked						Bonferroni's test	Mean Diff,	95% CI of diff,	Significant?	Summary		Bonferroni's test	Mean Diff,	95% CI of diff,	Significant?	Summary		Bonferroni's test	Mean Diff,	95% CI of diff,	Significant?	Summary		Bonferroni's test	Mean Diff,	95% CI of diff,	Significant?	Summary
	Alpha	0.05
								Row 1						Row 3						Row 5						Row 7
	Source of Variation	% of total variation	P value	P value summary	Significant?			WT vs. +ICI	0	-19,64 to 19,64	No	ns		WT vs. +ICI	-1.255	-20,89 to 18,38	No	ns		WT vs. +ICI	6.011	-13,63 to 25,65	No	ns		WT vs. +ICI	-0.6054	-20,24 to 19,03	No	ns
	Interaction	1.115	0.6294	ns	No			WT vs. +E2	0	-16,74 to 16,74	No	ns		WT vs. +E2	-1.846	-18,58 to 14,89	No	ns		WT vs. +E2	0.1131	-16,62 to 16,85	No	ns		WT vs. +E2	-10.28	-27,02 to 6,456	No	ns
	flow	55.26	< 0,0001	****	Yes			WT vs. +E4	0	-22,75 to 22,75	No	ns		WT vs. +E4	-5.542	-28,29 to 17,21	No	ns		WT vs. +E4	4.096	-18,66 to 26,85	No	ns		WT vs. +E4	11.65	-11,10 to 34,41	No	ns
	Column Factor	0.4086	0.8419	ns	No			+ICI vs. +E2	0	-20,55 to 20,55	No	ns		+ICI vs. +E2	-0.5916	-21,14 to 19,96	No	ns		+ICI vs. +E2	-5.898	-26,45 to 14,65	No	ns		+ICI vs. +E2	-9.676	-30,22 to 10,87	No	ns
	Subjects (matching)	14.29	< 0,0001	****	Yes			+ICI vs. +E4	0	-25,68 to 25,68	No	ns		+ICI vs. +E4	-4.287	-29,97 to 21,40	No	ns		+ICI vs. +E4	-1.915	-27,60 to 23,77	No	ns		+ICI vs. +E4	12.26	-13,43 to 37,94	No	ns
								+E2 vs. +E4	0	-23,54 to 23,54	No	ns		+E2 vs. +E4	-3.695	-27,24 to 19,85	No	ns		+E2 vs. +E4	3.982	-19,56 to 27,52	No	ns		+E2 vs. +E4	21.94	-1,605 to 45,48	No	ns
	ANOVA table	SS	DF	MS	F (DFn, DFd)	P value
	Interaction	1881	18	104.5	F (18, 174) = 0,8583	P = 0,6294		Row 2						Row 4						Row 6
	flow	93183	6	15531	F (6, 174) = 127,6	P < 0,0001		WT vs. +ICI	1.722	-17,92 to 21,36	No	ns		WT vs. +ICI	1.473	-18,17 to 21,11	No	ns		WT vs. +ICI	4.998	-14,64 to 24,64	No	ns
	Column Factor	689	3	229.7	F (3, 29) = 0,2765	P = 0,8419		WT vs. +E2	0.9103	-15,83 to 17,65	No	ns		WT vs. +E2	-4.644	-21,38 to 12,09	No	ns		WT vs. +E2	-4.04	-20,78 to 12,70	No	ns
	Subjects (matching)	24090	29	830.7	F (29, 174) = 6,823	P < 0,0001		WT vs. +E4	0.1147	-22,64 to 22,87	No	ns		WT vs. +E4	-7.968	-30,72 to 14,78	No	ns		WT vs. +E4	5.56	-17,19 to 28,31	No	ns
	Residual	21186	174	121.8				+ICI vs. +E2	-0.8116	-21,36 to 19,74	No	ns		+ICI vs. +E2	-6.117	-26,66 to 14,43	No	ns		+ICI vs. +E2	-9.038	-29,59 to 11,51	No	ns
								+ICI vs. +E4	-1.607	-27,29 to 24,08	No	ns		+ICI vs. +E4	-9.442	-35,13 to 16,24	No	ns		+ICI vs. +E4	0.5616	-25,12 to 26,25	No	ns
	Number of missing values	0						+E2 vs. +E4	-0.7956	-24,34 to 22,74	No	ns		+E2 vs. +E4	-3.324	-26,86 to 20,22	No	ns		+E2 vs. +E4	9.599	-13,94 to 33,14	No	ns
	Figure 1, panel I
	Flow rate	% dilation		WT					Flow rate	% dilation		WT + G35
	3	0	0	0	0	0	0		3	0	0	0	0	0
	6	1.25	5.05051	0.278351	0.34615	0.21622	1.36364		6	8.57143	0.2093	0	4.81481	4.57516
	9	28.75	31.3131	10.6186	2.11539	10	12.7273		9	25	37.2093	10.8911	20.9876	31.3726
	15	43.75	37.3737	38.4536	12.6923	20.8108	26.3636		15	35.7143	60	13.8614	32.0988	37.9085
	21	66.25	43.4344	54.9485	48.0769	37.973	37.7273		21	53.5714	70	44.5545	49.3827	45.098
	30	76.25	45.4545	66.2886	59.6154	42.7838	43.4091		30	63.5714	81	36.6336	48.1482	43.7908
	50	76.25	38.3838	67.3196	56.7308	45.1351	45.4091		50	67.1428	74	31.6832	37.037	50.3268
	Two-way RM ANOVA	Matching: Stacked
	Assume sphericity?	Yes
	Alpha	0.05
	Source of Variation	% of total variation	P value		Significant?
	flow x Column Factor	0.8	0.5877	ns	No
	flow	72	<0,0001	****	Yes
	Column Factor	0.43	0.6314	ns	No
	Subject	16	<0,0001	****	Yes
	ANOVA table	SS	DF	MS	F (DFn, DFd)	P value
	flow x Column Factor	273	5	55	F (5, 45) = 0,75	P=0,5877
	flow	24490	5	4898	F (5, 45) = 68	P<0,0001
	Column Factor	147	1	147	F (1, 9) = 0,25	P=0,6314
	Subject	5381	9	598	F (9, 45) = 8,3	P<0,0001
	Residual	3254	45	72
	Difference between column means
	Mean of WT	34
	Mean of WT + G36	37
	Difference between means	-3
	SE of difference	6
	95% CI of difference	-17 to 11
	Data summary
	Number of columns (Column Factor)	2
	Number of rows (flow)	6
	Number of subjects (Subject)	11
	Number of missing values	0
	Figure 1 panel K
	FLOW	% dilation	Esr1+/+		Female mice					FLOW	% dilation	Esr1 -/-		Female mice
	3	0	0	0	0	0	0	0		3	0	0	0	0	0	0	0
	6	0.819672	11.5385	7.89474	2.166	5.172	1.978	6.316		6	10.6061	11	20	3.681	23.81	3.061	4.31
	9	56.5574	28.8462	13.1579	22.383	22.414	6.861	13.684		9	18.1818	26	20	6.314	-5.952	18.367	6.897
	15	68.0328	38.4615	26.3158	45.487	27.586	14.711	21.053		15	36.3636	41	20	8.948	21.429	31.633	9.483
	21	69.6721	59.6154	47.3684	52.708	43.103	45.65	45.263		21	39.3939	38	27.1	13.112	33.333	41.837	18.103
	30	78.6885	76.9231	68.421	51.986	58.621	65.139	58.947		30	57.5758	37	29.03	21.922	32.143	57.143	20.69
	50	85.2459	76.9231	92.1053	54.874	63.793	62.383	43.158		50	59.0909	37	33.55	21.922	25	51.02	16.379
	Two-way RM ANOVA	Matching: Stacked
	Alpha	0.05
	Source of Variation	% of total variation	P value	P value summary	Significant?
	Interaction	7.825	< 0,0001	****	Yes
	Flow	62.08	< 0,0001	****	Yes
	Column Factor	8.653	0.0087	**	Yes
	Subjects (matching)	10.61	< 0,0001	****	Yes
	ANOVA table	SS	DF	MS	F (DFn, DFd)	P value
	Interaction	4477	6	746.2	F (6, 72) = 8,668	P < 0,0001
	Flow	35522	6	5920	F (6, 72) = 68,77	P < 0,0001
	Column Factor	4951	1	4951	F (1, 12) = 9,790	P = 0,0087
	Subjects (matching)	6069	12	505.7	F (12, 72) = 5,875	P < 0,0001
	Residual	6198	72	86.08
	Figure 1 panel L
	FLOW	% dilation	Esr1+/+		OVX Female mice			FLOW	% dilation	Esr1+/+		OVX Female mice
	3	0	0	0	0	0		3	0	0	0	0	0	0
	6	13.636	23.2	8.60415	0	8.26286		6	20.112	9.589	4.405	9.738	6.897	2.286
	9	22.727	33.6	30.5012	0	20.0141		9	18.994	27.397	8.691	13.767	6.034	1.714
	15	28.788	42.4	32.6021	25.833	38.7891		15	22.346	34.247	18.036	19.523	13.793	6.857
	21	57.576	54.4	44.813	47.5	61.8334		21	22.905	40.411	25.843	28.72	24.138	10.857
	30	81.818	59.2	48.2189	44.167	79.2459		30	25.14	38.356	35.633	36.908	25.862	8
	50	71.212	56.8	43.4632	47.5	73.5083		50	26.816	32.877	34.834	36.873	23.276	21.143
	Two-way RM ANOVA	Matching: Stacked
	Alpha	0.05
	Source of Variation	% of total variation	P value	P value summary	Significant?
	Interaction	9.384	< 0,0001	****	Yes
	flow	61.7	< 0,0001	****	Yes
	gene	15.7	0.003	**	Yes
	Subjects (matching)	8.761	< 0,0001	****	Yes
	ANOVA table	SS	DF	MS	F (DFn, DFd)	P value
	Interaction	3144	6	524	F (6, 54) = 10,29	P < 0,0001
	flow	20669	6	3445	F (6, 54) = 67,62	P < 0,0001
	gene	5261	1	5261	F (1, 9) = 16,13	P = 0,0030
	Subjects (matching)	2935	9	326.1	F (9, 54) = 6,402	P < 0,0001
	Residual	2751	54	50.94
	Number of missing values	0
	Figure 1 panel M
	FLOW	% dilation	Esr1+/+		uterine arteries		FLOW	% dilation	Esr1-/-		uterine arteries
	3	0	0	0	0		3	0	0	0	0	0
	6	0	6.06061	6.0241	17.8571		6	-1.75439	10.5263	3.65449	5.66038	0
	9	32.4561	20.6897	10.8434	24.1135		9	3.77193	10.5263	1.66113	5.66038	3.33333
	15	45.614	31.0345	21.6867	43.9716		15	9.29825	10.5263	21.6611	18.1761	30
	21	49.1228	55.1724	27.7108	47.5177		21	14.5614	21.0526	30.3322	18.1761	50
	30	54.386	55.1724	31.3253	46.0993		30	24.5614	26.3158	20.299	18.1761	46.6667
	50	58.7719	82.7586	36.1446	47.5177		50	24.5614	31.5789	11.6279	8.80503	46.6667
	Two-way RM ANOVA	Matching: Stacked
	Alpha	0.05
	Source of Variation	% of total variation	P value	P value summary	Significant?
	Interaction	6.124	0.0107	*	Yes
	flow	58.95	< 0,0001	****	Yes
	Column Factor	15.26	0.0119	*	Yes
	Subjects (matching)	9.397	0.0013	**	Yes
	ANOVA table	SS	DF	MS	F (DFn, DFd)	P value
	Interaction	1480	6	246.7	F (6, 42) = 3,228	P = 0,0107
	flow	14248	6	2375	F (6, 42) = 31,07	P < 0,0001
	Column Factor	3689	1	3689	F (1, 7) = 11,37	P = 0,0119
	Subjects (matching)	2271	7	324.5	F (7, 42) = 4,246	P = 0,0013
	Residual	3210	42	76.43
	Number of missing values	0
