# Supplementary material for: Membrane estrogen receptor alpha (ERα) participates in flow-mediated dilation in a ligand-independent manner
Source: eLife journal article supplement (doi:10.7554/elife.68695), 2021-11-29
Supplement: supp [file elife-68695-supp-v1.zip › elife_poa_e68695_Figure_2_source_data_1.xlsx]

## Sheet: Feuil1
	Data and statistical analysis from experiments plotted in Figure 1A to H
	Figure 2, panel A
	FLOW		% dilation	Esr2 +/+					FLOW	% dilation	Esr2 -/-
	3		0	0	0	0	0		3	0	0	0	0	0	0	0	0	0	0	0	0	0
	6		14.851	23.148	11.765	14.286	12		6	16.364	9.091	5.333	2.752	15	10.256	14.159	12.7907	3.894	11.494	22.059	0	18.28
	9		15.842	41.667	12.5	27.143	10.667		9	38.182	18.182	9.333	6.422	28.75	13.675	8.85	22.093	7.487	18.391	29.412	3.077	12.903
	15		25.743	55.556	69.853	40	25.333		15	65.455	24.242	14.667	11.009	41.25	30.769	26.549	34.8837	13.477	18.966	44.118	33.846	49.462
	21		29.703	63.889	73.529	55.714	44		21	41.818	68.182	21.333	14.679	50	42.735	39.823	55.8139	25.669	25.287	64.706	41.538	72.043
	30		41.584	80	82.353	62.857	64		30	89.091	71.212	30.667	14.679	76.25	42.735	40.708	69.7674	32.297	40.805	82.353	76.923	25.806
	50		45.545	76.852	46.324	55.714	56		50	90.909	51.515	32	18.349	66.25	43.59	23.894	55.8139	28.704	45.977	83.824	67.692	63.441
	Two-way RM ANOVA	Matching: Stacked
	Assume sphericity?	No
	Alpha	0.05
	Source of Variation	% of total variation	P value	P value summary	Significant?	Geisser-Greenhouse's epsilon
	flow x Column Factor	0.5968	0.7302	ns	No
	flow	55	<0,0001	****	Yes	0.5135
	Column Factor	1.486	0.2681	ns	No
	Subject	18.06	<0,0001	****	Yes
	ANOVA table	SS	DF	MS	F (DFn, DFd)	P value
	flow x Column Factor	483.7	6	80.62	F (6, 96) = 0,5993	P=0,7302
	flow	44582	6	7430	F (3,081, 49,29) = 55,24	P<0,0001
	Column Factor	1204	1	1204	F (1, 16) = 1,316	P=0,2681
	Subject	14638	16	914.9	F (16, 96) = 6,801	P<0,0001
	Residual	12914	96	134.5
	Number of missing values	0
	Figure 2, panel B	Phenylephrine			Figure 2, panel C		Diameter
		Esr2 +/+	Esr2 -/-				Esr2 +/+	Esr2 -/-
		28.0488	63				211	213
		37.2093	47.5472				245	265
		41.2281	44				194	300
		46.3115	48.0916				265	262
		56	41.3043				334	230
		32.4074	52				306	275
		65.3456					315	236
								243
		Mann-Withney test					Mann-Withney test
		P value	0.2949				P value	0.5358
		Exact or approximate P value?	Exact				Exact or approximate P value?	Exact
		P value summary	ns				P value summary	ns
		Significantly different? (P < 0.05)	No				Significantly different? (P < 0.05)	No
		One- or two-tailed P value?	Two-tailed				One- or two-tailed P value?	Two-tailed
		Sum of ranks in column U,V	41 , 50				Sum of ranks in column D,R	58 , 62
		Mann-Whitney U	13				Mann-Whitney U	22
		Difference between medians					Difference between medians
		Median of column U	41,23, n=7				Median of column D	252,5, n=8
		Median of column V	47,82, n=6				Median of column R	266,0, n=7
		Difference: Actual	6.591				Difference: Actual	13.5
		Difference: Hodges-Lehmann	6.827				Difference: Hodges-Lehmann	15
	Figure 2, panel D
	Acetylcholine (LogM)	% dilation	Esr2 +/+					Acetylcholine (LogM)	% dilation	Esr2 -/-
	-9	9.807	0.005	7.578	7.973	0.73		-9	-1.894	3.571	4.081	6.029	0.617
	-8	14.214	0.359	20.856	19.544	1.961		-8	-1.154	13.325	17.548	7.509	3.321
	-7	49.575	2.563	44.9	53.578	27.342		-7	46.898	44.647	7.567	28.271	32.789
	-6	95.032	43.621	94.5	68.359	59.445		-6	83.514	90.794	12.38	35.553	77.353
	-5	101.459	54.418	99.213	91.248	84.791		-5	99.242	99.603	34.439	45.688	86.746
	Two-way RM ANOVA	Matching: Stacked
	Alpha	0.05
	Source of Variation	% of total variation	P value	P value summary	Significant?
	Interaction	0.4429	0.865	ns	No
	ACh	73.43	< 0,0001	****	Yes
	Column Factor	0.9943	0.4715	ns	No
	Subjects (matching)	13.93	0.0005	***	Yes
	ANOVA table	SS	DF	MS	F (DFn, DFd)	P value
	Interaction	271.7	4	67.92	F (4, 32) = 0,3162	P = 0,8650
	ACh	45046	4	11262	F (4, 32) = 52,43	P < 0,0001
	Column Factor	609.9	1	609.9	F (1, 8) = 0,5712	P = 0,4715
	Subjects (matching)	8543	8	1068	F (8, 32) = 4,971	P = 0,0005
	Residual	6874	32	214.8
	Number of missing values	0
	Figure 2, panel E
	FLOW		% dilation	WT					FLOW	% dilation	EC-ERa
	3	0	0	0	0	0	0		3	0	0	0	0	0	0	0	0	0
	6	15.85	3.85	17.57	3.7	7.69	11.02		6	12.04	2.32	0	-0.97	14.42	7.2	-7.53	5.08	0
	9	30.49	8.65	33.78	16.05	13.68	20.34		9	27.78	12.86	5.56	5.83	24.21	10.64	16.13	9.32	0
	15	32.93	13.46	32.43	50.62	18.8	30.51		15	32.41	18.75	26.54	3.88	41.69	22.46	27.96	11.86	0
	21	45.12	23.08	41.89	61.73	23.08	36.44		21	28.7	36.67	31.48	5.83	50.29	23.71	30.11	21.19	0
	30	60.98	47.12	43.24	65.43	39.32	44.07		30	28.7	35.18	39.51	12.62	52.76	32.23	33.33	27.97	18.18
	50	59.76	42.31	44.59	72.84	39.32	43.22		50	32.41	36.67	37.65	18.16	46.12	29.66	37.63	24.58	20.11
	Two-way RM ANOVA
	Source of Variation	% of total variation	P value	P value summary	Significant?
	Interaction	2.887	0.0069	**	Yes
	Flow	63.13	< 0,0001	****	Yes
	Column Factor	8.081	0.0273	*	Yes
	Subjects (matching)	16.99	< 0,0001	****	Yes
	ANOVA table	SS	DF	MS	F (DFn, DFd)	P value
	Interaction	1020	6	170	F (6, 78) = 3,229	P = 0,0069
	Flow	22303	6	3717	F (6, 78) = 70,63	P < 0,0001
	Column Factor	2855	1	2855	F (1, 13) = 6,182	P = 0,0273
	Subjects (matching)	6004	13	461.8	F (13, 78) = 8,775	P < 0,0001
	Residual	4105	78	52.63
	Number of missing values	0
	Figure 2, panel F	Phenylephrine			Figure 2, panel G		Diameter
		WT	EC-ERa				WT	EC-ERa
		32.6252	43.968				246	308
		42.3291	42.9512				246	266
		44.6837	51.9707				231	246
		43.4139	61.2191				228	209
		40.822	50.5293				296	384
		32.4986	41.1201				244	264
		68.5294	45.0234				275	218
							228	277
		Mann-Withney test					Mann-Withney test
		P value	0.175				P value	0.4233
		Exact or approximate P value?	Exact				Exact or approximate P value?	Exact
		P value summary	ns				P value summary	ns
		Significantly different? (P < 0.05)	Yes				Significantly different? (P < 0.05)	No
		One- or two-tailed P value?	Two-tailed				One- or two-tailed P value?	Two-tailed
		Sum of ranks in column G,H	34 , 71				Sum of ranks in column J,K	60 , 76
		Mann-Whitney U	6				Mann-Whitney U	24
		Difference between medians					Difference between medians
		Median of column G	40,82, n=7				Median of column J	245,0, n=8
		Median of column H	45,02, n=7				Median of column K	265,0, n=8
		Difference: Actual	4.201				Difference: Actual	20
		Difference: Hodges-Lehmann	9.707				Difference: Hodges-Lehmann	18
	Figure 3, panel H
	Acetylcholine (LogM)	% dilation	WT				Acetylcholine (LogM)	% dilation	EC-ERa
	-9	2.61355	4.06909	4.16667	4.86289		-9	0.01074	4.90196	2.8312	5.50616	4.54545
	-8	-0.0650223	6.4744	19.4444	7.11718		-8	2.09407	15.6863	4.80769	9.40257	8.18182
	-7	13.0699	18.4446	37.5	19.4875		-7	9.34815	23.5294	20.9936	18.8961	10.9091
	-6	37.7426	58.9173	68.0556	51.8332		-6	29.0378	61.7647	47.3291	53.0646	28.1818
	-5	34.5205	73.4726	88.8889	72.5275		-5	47.6482	65.6863	58.8675	65.1613	47.2727
	Two-way RM ANOVA	Matching: Stacked
	Alpha	0.05
	Source of Variation	% of total variation	P value	P value summary	Significant?
	Interaction	0.7988	0.379	ns	No
	ACh	84.11	< 0,0001	****	Yes
	Column Factor	1.122	0.395	ns	No
	Subjects (matching)	9.569	< 0,0001	****	Yes
	ANOVA table	SS	DF	MS	F (DFn, DFd)	P value
	Interaction	224.7	4	56.18	F (4, 28) = 1,093	P = 0,3790
	ACh	23661	4	5915	F (4, 28) = 115,1	P < 0,0001
	Column Factor	315.8	1	315.8	F (1, 7) = 0,8210	P = 0,3950
	Subjects (matching)	2692	7	384.6	F (7, 28) = 7,484	P < 0,0001
	Residual	1439	28	51.39
	Number of missing values	0
