# Supplementary material for: Membrane estrogen receptor alpha (ERα) participates in flow-mediated dilation in a ligand-independent manner
Source: eLife journal article supplement (doi:10.7554/elife.68695), 2021-11-29
Supplement: supp [file elife-68695-supp-v1.zip › elife_poa_e68695_Figure_3_figure_supplement_1.pdf]

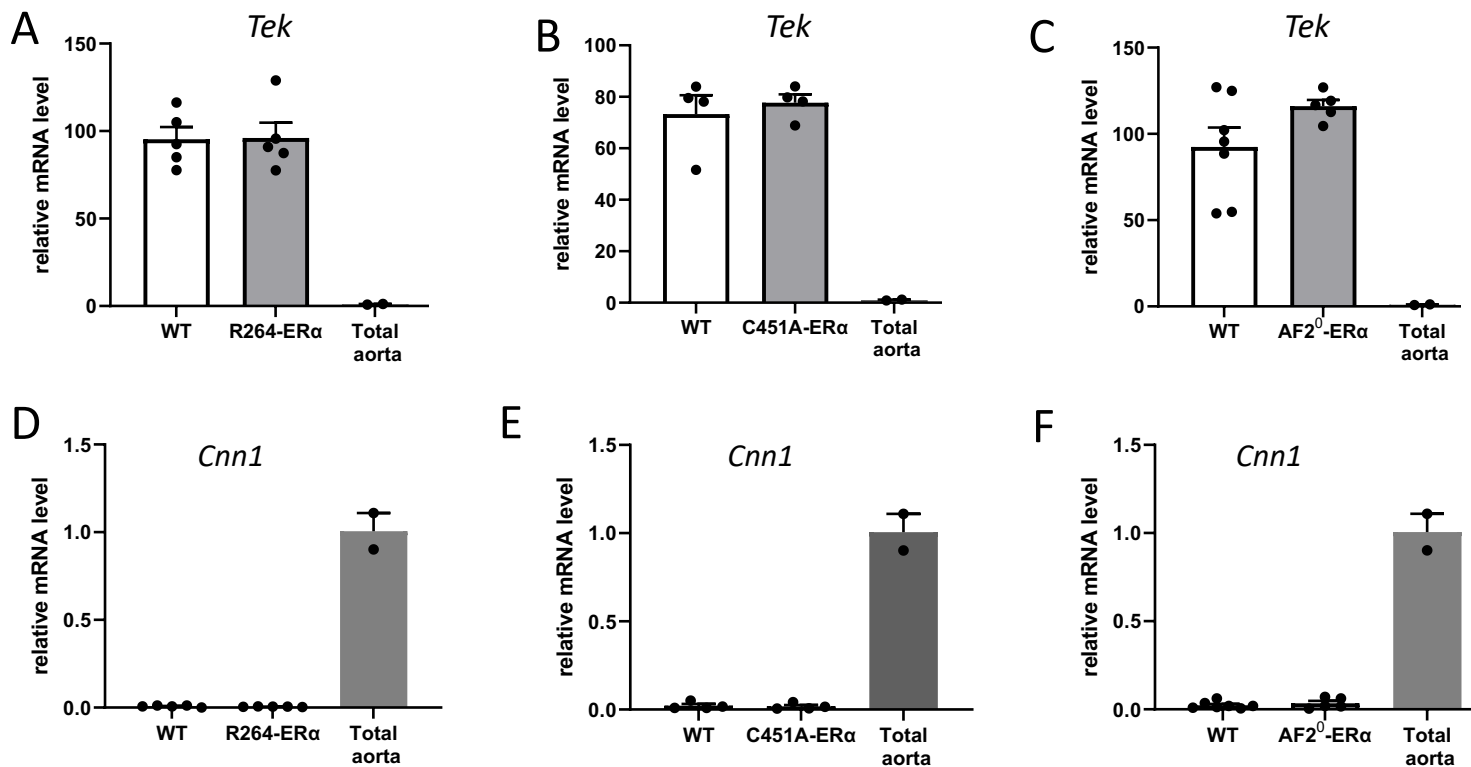

**Figure 3; figure supplement 1: Markers of endothelial and smooth muscle cells in mouse aortic endothelial cells.**

The endothelial marker *Tie2* (*Tek*, A-C) and the smooth muscle marker (*Cnn1*, D-F) expression level was determined in aortic endothelial cells isolated from R264A-ERα (R264A) and R264A-WT (WT) male mice (A, D), C451A-ERα (C451A) and C451A-WT (WT) male mice (B,E) and AF2°ERα (AF2°) and AF2°WT (WT) male mice (C,F). *Tek* and *Cnn1* gene expression levels were also measured in the total aorta (endothelium, smooth muscle and adventitia) in each group.

Means ± the SEM are shown (n = 5 mice per group for *Tek* and *Cnn1*).

NS WT versus R264A-ERα, C451A-ERα or AF2°ERα: two-tailed Mann-Whitney test
