# Supplementary material for: Membrane estrogen receptor alpha (ERα) participates in flow-mediated dilation in a ligand-independent manner
Source: eLife journal article supplement (doi:10.7554/elife.68695), 2021-11-29
Supplement: supp [file elife-68695-supp-v1.zip › elife_poa_e68695_Figure_3_source_data_1.xlsx]

## Sheet: Feuil1
	Data and statistical analysis from experiments plotted in Figure 3 B to D, F to H and J to L and for Figure 3 supplement Figure 1 A to F
	Figure 3, B, F, J + supplements:	Figure 3, panel B			Figure 3, panel F			Figure 3, panel J			supplement 1, A			supplement 1, B			supplement 1, C			supplement 1, D			supplement 1, E			supplement 1, f
		WT	R264-ERα		WT	AF20-ERα		WT	C451A-ERα		WT	R264-ERα		WT	AF20-ERα		WT	C451A-ERα		WT	R264-ERα		WT	AF20-ERα		WT	C451A-ERα
		0.962	0.816		0.531	0.959		1.403	1.423		77.676	90.991					83.976	78.195		0.001	0.006		0.019	0.017		0.009	0.016
		1.171	0.668		0.781	1.158		1.315	1.186		116.374	77.51		53.948	104.579		79.577	84.073		0.012	0.005		0.006	0.071		0.017	0.005
		1.638	0.812		0.745	0.722		0.744	0.935		105.076	87.394		88.532	126.977		51.631	68.879		0.007	0.007		0.009	0.062		0.051	0.042
		0.595	1.372		1.667	1.24		0.728	1.867		85.051	128.948		102.206	112.655		78.125	79.798		0.012	0.004		0.019	0.004		0.009	0.007
		0.912	1.34		1.431	1.137					92.509	95.627		127.086	116.701					0.007	0.003		0.013	0.019
					1.302									124.882	119.168								0.036
					1.043									95.588									0.062
														54.842
	Mann-Withney test:
	Table Analyzed		Arg Esr1			AF2 Esr1			Palm Esr1			Arg Tie2			AF2 Tie2			C451A Tie2			Arg Cnn1			AF2 Cnn1			C451A Cnn1
	Column B		R264-ERα			AF20-ERα			C451A-ERα			R264-ERα			AF20-ERα			C451A-ERα			R264-ERα			AF20-ERα			C451A-ERα
	vs.		vs,			vs,			vs,			vs,			vs,			vs,			vs,			vs,			vs,
	Column A		WT			WT			WT			WT			WT			WT			WT			WT			WT
	Mann Whitney test
	P value		0.8413			0.8763			0.3429			>0,9999			0.202			0.6857			0.2063			0.673			0.4571
	Exact or approximate P value?		Exact			Exact			Exact			Exact			Exact			Exact			Exact			Exact			Exact
	P value summary		ns			ns			ns			ns			ns			ns			ns			ns			ns
	Significantly different (P < 0.05)?		No			No			No			No			No			No			No			No			No
	One- or two-tailed P value?		Two-tailed			Two-tailed			Two-tailed			Two-tailed			Two-tailed			Two-tailed			Two-tailed			Two-tailed			Two-tailed
	Sum of ranks in column A,B		29 , 26			47 , 31			14 , 22			28 , 27			37 , 41			16 , 20			34 , 21			42,50 , 35,50			21 , 15
	Mann-Whitney U		11			16			4			12			9			6			6			14.5			5
	Difference between medians
	Median of column A		0,9620, n=5			1,043, n=7			1,030, n=4			92,51, n=5			95,59, n=7			78,85, n=4			0,007000, n=5			0,01900, n=7			0,01300, n=4
	Median of column B		0,8160, n=5			1,137, n=5			1,305, n=4			90,99, n=5			116,7, n=5			79,00, n=4			0,005000, n=5			0,01900, n=5			0,01150, n=4
	Difference: Actual		-0.146			0.094			0.275			-1.518			21.11			0.1455			-0.002			0			-0.0015
	Difference: Hodges-Lehmann		-0.1			-0.059			0.3245			-0.166			21.11			0.159			-0.003			0.006			-0.003
	Figure 3, panel C
	FLOW		% dilation	WT					FLOW	% dilation	AF2°-Eralpha
	3		0	0	0	0	0		3	0	0	0	0	0	0	0	0	0	0	0	0	0
	6		14.851	23.148	11.765	14.286	12		6	16.364	9.091	5.333	2.752	15	10.256	14.159	12.7907	3.894	11.494	22.059	0	18.28
	9		15.842	41.667	12.5	27.143	10.667		9	38.182	18.182	9.333	6.422	28.75	13.675	8.85	22.093	7.487	18.391	29.412	3.077	12.903
	15		25.743	55.556	69.853	40	25.333		15	65.455	24.242	14.667	11.009	41.25	30.769	26.549	34.8837	13.477	18.966	44.118	33.846	49.462
	21		29.703	63.889	73.529	55.714	44		21	41.818	68.182	21.333	14.679	50	42.735	39.823	55.8139	25.669	25.287	64.706	41.538	72.043
	30		41.584	80	82.353	62.857	64		30	89.091	71.212	30.667	14.679	76.25	42.735	40.708	69.7674	32.297	40.805	82.353	76.923	25.806
	50		45.545	76.852	46.324	55.714	56		50	90.909	51.515	32	18.349	66.25	43.59	23.894	55.8139	28.704	45.977	83.824	67.692	63.441
	Two-way RM ANOVA	Matching: Stacked
	Source of Variation	% of total variation	P value	P value summary	Significant?
	flow x Column Factor	0.5968	0.7302	ns	No
	flow	55	<0,0001	****	Yes
	Column Factor	1.486	0.2681	ns	No
	Subject	18.06	<0,0001	****	Yes
	ANOVA table	SS	DF	MS	F (DFn, DFd)	P value
	flow x Column Factor	483.7	6	80.62	F (6, 96) = 0,5993	P=0,7302
	flow	44582	6	7430	F (3,081, 49,29) = 55,24	P<0,0001
	Column Factor	1204	1	1204	F (1, 16) = 1,316	P=0,2681
	Subject	14638	16	914.9	F (16, 96) = 6,801	P<0,0001
	Residual	12914	96	134.5
	Number of missing values	0
	Figure 3, panel G
	FLOW		% dilation	WT					FLOW	% dilation	C451A-Eralpha
	3	0	0	0	0	0	0		3	0	0	0	0	0	0	0	0
	6	11.579	18.8235	0.934579	9.992	12.676	13.861		6	7.778	6.202	5.042	4.878	5.88235	7.071	16.667	4.516
	9	21.053	29.4118	4.6729	24.984	33.803	17.822		9	12.222	11.628	10.924	7.317	6.72269	16.162	4.444	10.323
	15	35.789	38.8235	10.2804	36.696	42.254	28.713		15	6.667	20.155	23.529	8.943	11.7647	22.222	20	37.419
	21	57.895	52.9412	17.757	50.344	53.521	45.545		21	4.444	35.659	31.933	19.512	24.3697	28.283	43.333	49.032
	30	62.105	63.5294	34.5794	58.402	61.972	73.267		30	5.556	44.186	42.017	29.268	38.6555	35.354	54.444	46.452
	50	60	61.1765	35.514	58.843	47.887	70.297		50	18.889	37.984	44.538	28.455	37.8151	38.384	54.444	45.161
	Two-way RM ANOVA	Matching: Stacked
	Assume sphericity?	Yes
	Alpha	0.05
	Source of Variation	% of total variation	P value	P value summary	Significant?
	flow x Column Factor	2.978	0.002	**	Yes
	flow	70.13	<0,0001	****	Yes
	Column Factor	8.629	0.0114	*	Yes
	Subject	11.62	<0,0001	****	Yes
	ANOVA table	SS	DF	MS	F (DFn, DFd)	P value
	flow x Column Factor	1234	6	205.7	F (6, 72) = 3,905	P=0,0020
	flow	29070	6	4845	F (6, 72) = 91,97	P<0,0001
	Column Factor	3577	1	3577	F (1, 12) = 8,914	P=0,0114
	Subject	4815	12	401.3	F (12, 72) = 7,618	P<0,0001
	Residual	3793	72	52.68
	Number of missing values	0
	Figure 3, panel K
	FLOW		% dilation	WT								FLOW		% dilation	R264A-Eralpha
	3	0	0	0	0	0	0	0	0	0		3	0	0	0	0	0	0	0	0	0	0
	6	0	11.94	7.921	15.663	4.386	22.449	7.576	18	3.425		6	9.091	4.301	3.158	5.6	10.909	-4.098	7.059	7.246	7.143	2.381
	9	3.846	24.627	15.842	36.145	37.719	30.612	15.909	45.313	6.164		9	19.192	18.28	3.158	4.8	49.091	-2.459	10.588	13.043	7.937	16.667
	15	23.077	34.328	20.792	51.807	46.491	42.857	20.455	35.938	34.247		15	22.222	18.28	11.579	8	58.182	0	20	18.841	7.937	32.143
	21	44.231	45.522	29.703	68.675	57.018	48.98	32.576	57.813	69.178		21	31.313	17.204	16.842	13.6	76.364	-2.459	31.765	24.638	21.429	46.429
	30	101.923	47.761	38.614	69.88	58.772	73.469	42.424	79.688	75.342		30	32.323	21.505	18.947	23.2	43.636	4.918	44.706	21.739	28.571	70.238
	50	100	41.045	38.614	71.084	46.491	79.592	41.667	12.5	61.644		50	22.222	25.806	25.263	19.2	18.182	3.279	34.118	11.594	29.365	61.905
	Two-way RM ANOVA	Matching: Stacked
	Assume sphericity?	Yes
	Alpha	0.05
	Source of Variation	% of total variation	P value	P value summary	Significant?
	flow x Column Factor	6.122	0.0002	***	Yes
	flow	47.73	<0,0001	****	Yes
	Column Factor	12.03	0.0015	**	Yes
	Subject	14.38	<0,0001	****	Yes
	ANOVA table	SS	DF	MS	F (DFn, DFd)	P value
	flow x Column Factor	4653	6	775.6	F (6, 102) = 4,873	P=0,0002
	flow	36281	6	6047	F (6, 102) = 37,99	P<0,0001
	Column Factor	9148	1	9148	F (1, 17) = 14,23	P=0,0015
	Subject	10929	17	642.9	F (17, 102) = 4,039	P<0,0001
	Residual	16235	102	159.2
	Number of missing values	0
	Figure 3, panel D
	Acetylcholine (LogM)	% dilation	WT							Acetylcholine (LogM)	% dilation	AF2-Eralpha
	-9	3.783	3.935	1.222	-0.85	-1.427	4.868	1.284		-9	7.969	4.651	1.859	6.87	4.833	0.846	4.344	4.5	1.754	3.72	0.466
	-8	7.718	3.436	14.333	6.85	3.44	8.488	13.794		-8	31.719	-6.977	7.493	7.518	13.596	2.681	6.463	7.622	18.742	7.356	4.144
	-7	54.5	17.77	57.111	39.75	33.956	36.965	53.407		-7	100	14.111	33.108	26.79	32.293	33.442	26.015	18.584	50.374	50.601	59.133
	-6	93.047	78.62	93.889	97.55	80.981	67.832	96.723		-6	83.594	63.101	61.277	71.028	62.435	98.253	54.44	82.171	94.214	95.693	97.018
	-5	100.203	82.237	96.333	102	87.036	71.739	100.399		-5	91.094	89.876	88.094	79.072	69.513	101.199	77.516	98.067	98.438	98.439	98.89
	Two-way RM ANOVA	Matching: Stacked
	Alpha	0.05
	Source of Variation	% of total variation	P value	P value summary	Significant?
	Interaction	0.2147	0.6656	ns	No
	ACh	86.36	< 0,0001	****	Yes
	Column Factor	0.04817	0.6884	ns	No
	Subjects (matching)	4.62	0.0005	***	Yes
	ANOVA table	SS	DF	MS	F (DFn, DFd)	P value
	Interaction	281.8	4	70.45	F (4, 64) = 0,5976	P = 0,6656
	ACh	113335	4	28334	F (4, 64) = 240,4	P < 0,0001
	Column Factor	63.21	1	63.21	F (1, 16) = 0,1668	P = 0,6884
	Subjects (matching)	6063	16	379	F (16, 64) = 3,215	P = 0,0005
	Residual	7544	64	117.9
	Number of missing values	0
	Figure 3, panel H
	Acetylcholine (LogM)	% dilation	WT													Acetylcholine (LogM)	% dilation	C451A-Eralpha
	-9	3.125	6.369	1.053	1.337	1.213	4.541	-0.764	7.028	-0.175	5.625	1.952	5.581	5.117		-9	3.944	4.18	3.459	0.915	3.173	4.514	1.987	1.987
	-8	8.953	7.779	3.158	2.073	4.459	5.322	-0.221	14.745	0.994	6.859	4.963	12.552	7.233		-8	14.394	8.523	8.102	12.325	8.237	6.203	-1.151	-1.151
	-7	23.393	13.967	13.684	22.061	22.751	16.635	2.377	16.811	4.286	25.149	18.529	19.821	14.055		-7	19.2	16.477	26.825	33.586	11.786	23.627	7.857	7.857
	-6	73.003	44.83	37.268	57.196	22.647	44.822	17.065	43.946	32.904	43.752	59.832	79.409	29.672		-6	35.821	32.63	53.433	58.372	36.498	37.326	22.644	22.644
	-5	85.26	76.921	47.744	60.873	26.738	47.069	14.926	46.148	42.813	52.466	80.596	90.422	39.305		-5	69.057	50.69	78.042	72.17	37.755	49.425	20.888	20.888
	Two-way RM ANOVA	Matching: Stacked
	Assume sphericity?	No
	Alpha	0.05
	Source of Variation	% of total variation	P value	P value summary	Significant?
	ACh x Column Factor	0.382	0.7178	ns	No
	ACh	64.31	<0,0001	****	Yes
	Column Factor	0.001126	0.97	ns	No
	Subject	13.95	<0,0001	****	Yes
	ANOVA table	SS	DF	MS	F (DFn, DFd)	P value
	ACh x Column Factor	216.8	4	54.19	F (4, 72) = 0,5248	P=0,7178
	ACh	36491	4	9123	F (1,384, 24,91) = 88,34	P<0,0001
	Column Factor	0.6387	1	0.6387	F (1, 18) = 0,001453	P=0,9700
	Subject	7913	18	439.6	F (18, 72) = 4,257	P<0,0001
	Residual	7436	72	103.3
	Number of missing values	0
	Figure 3, panel L
	Acetylcholine (LogM)	% dilation	WT					Acetylcholine (LogM)	% dilation	R264A-ERalpha
	-9	1.2314		-0.175	0.645	6.422		-9	6.202	0.82	0.681	4.863	2.772	4.725
	-8	11.2318		0.994	0.645	16.514		-8	8.527	4.918	3.081	9.279	25.063	8.961
	-7	24.2134		4.286	2.581	22.936		-7	41.085	21.311	15.422	11.668	32.473	8.573
	-6	57.6307		32.904	20	68.807		-6	51.163	59.836	34.549	20.581	71.062	25.892
	-5	63.3266		42.813	13.548	54.128		-5	89.922	101.639	54.805	25.715	84.321	37.417
	Two-way RM ANOVA	Matching: Stacked
	Alpha	0.05
	Source of Variation	% of total variation	P value	P value summary	Significant?
	Interaction	2.419	0.2867	ns	No
	ACh	57.59	< 0,0001	****	Yes
	Column Factor	1.554	0.4344	ns	No
	Subjects (matching)	18.36	0.0005	***	Yes
	ANOVA table	SS	DF	MS	F (DFn, DFd)	P value
	Interaction	832.4	4	208.1	F (4, 32) = 1,312	P = 0,2867
	ACh	19820	4	4955	F (4, 32) = 31,23	P < 0,0001
	Column Factor	535	1	535	F (1, 8) = 0,6772	P = 0,4344
	Subjects (matching)	6320	8	790	F (8, 32) = 4,979	P = 0,0005
	Residual	5077	32	158.7
	Number of missing values	0
