# Supplementary material for: Membrane estrogen receptor alpha (ERα) participates in flow-mediated dilation in a ligand-independent manner
Source: eLife journal article supplement (doi:10.7554/elife.68695), 2021-11-29
Supplement: supp [file elife-68695-supp-v1.zip › elife_poa_e68695_Figure_4_source_data_1.xlsx]

## Sheet: Feuil1
	Data and statistical analysis from experiments plotted in Figure 4A to H
	Figure 4 panel A
	FLOW	% dilation	Esr1+/+											FLOW	% dilation	Esr1-/-
	3	0	0	0	0	0	0	0	0	0	0	0		3	0	0	0	0	0	0	0	0
	6	16.026	9.211	4.706	0	-7.843	14.286	26.506	24.176	16.216	9.677	7.759		6	10.811	1.961	7.955	9.901	9.901	1.681	8.547	11.4035
	9	46.795	17.105	12.941	20.313	11.765	31.746	9.639	32.967	37.838	17.204	12.931		9	31.081	9.804	10.227	34.653	34.653	4.202	17.094	21.0526
	15	48.077	32.895	41.176	37.5	27.451	57.143	19.277	26.374	55.405	22.581	17.241		15	40.541	21.569	18.182	33.333	26.733	15.966	30.769	27.193
	21	55.769	46.053	51.765	56.25	41.176	65.079	33.735	49.451	94.595	50.538	27.586		21	60.811	41.176	30.682	25.203	42.574	23.529	37.607	38.5965
	30	61.538	53.947	56.471	59.375	56.863	71.429	42.169	58.242	98.649	66.667	36.207		30	78.378	44.118	34.091	35.772	28.713	23.529	44.444	46.4912
	50	65.385	31.579	61.176	54.688	78.431	68.254	42.169	53.846	94.595	54.839	33.621		50	87.838	37.255	37.5	34.146	24.752	26.891	41.88	48.2456
	FLOW	% dilation	Esr1+/+ + L-NNA											FLOW	% dilation	Esr1-/- + L-NNA
	3	0	0	0	0	0	0	0						3	0	0	0	0	0	0	0	0	0
	6	9.836	5.926	4.63	2.874	1.878	3.2967	0.581						6	6.294	3.846	5.797	14.189	3.906	10	1.058	2.20994	9.27835
	9	19.672	8.889	10.185	4.023	2.817	3.2967	3.488						9	11.189	11.538	7.246	22.297	8.594	8.889	1.587	3.31492	0
	15	22.951	12.593	18.519	6.322	6.573	3.2967	2.326						15	16.783	32.692	11.594	29.73	14.063	22.222	5.82	4.41989	1.03093
	21	27.869	31.852	24.074	23.563	15.962	8.24176	8.14						21	30.769	42.308	20.29	43.243	39.063	40	8.466	6.07735	12.3711
	30	26.23	42.222	25.926	37.356	23.005	18.6813	9.302						30	48.252	48.077	28.986	54.054	53.906	56.667	23.28	9.94475	19.5876
	50	26.23	48.889	25	37.931	23.474	13.7363	8.721						50	41.958	42.308	25.362	49.324	49.219	51.111	26.984	11.6022	10.309
	FLOW	% dilation	Esr1+/+ + L-NNA + indo											FLOW	% dilation	Esr1-/- + L-NNA + indo
	3	0	0	0	0	0								3	0	0	0	0	0
	6	9.565	7.767	0.613	2.5	9.62963								6	5.66	13.333	15.385	2.885	-2.04082
	9	11.304	14.563	0.613	4.375	16.2963								9	11.95	13.333	20.979	10.577	1.36054
	15	20	23.301	6.135	9.375	24.4444								15	16.981	24.444	20.979	16.346	12.2449
	21	18.261	36.893	6.748	10.625	25.1852								21	30.818	46.667	25.874	35.096	17.6871
	30	18.261	54.369	15.951	11.875	31.8518								30	36.478	46.667	32.867	39.904	22.449
	50	13.913	33.01	14.11	6.875	40								50	35.849	43.333	34.965	36.058	23.1292
	ANOVA repeated mesurements
	Bonferroni's multiple comparisons test			Mean Diff,	95% CI of diff,	Significant?	Summary		Bonferroni's multiple comparisons test			Mean Diff,	95% CI of diff,	Significant?	Summary		Bonferroni's multiple comparisons test			Mean Diff,	95% CI of diff,	Significant?	Summary
	Row 1								Row 4								Row 7
	WT Bl6N +LNNA (6) vs. WT Bl6N +LNNA+INDO (4)			0	-22,96 to 22,96	No	ns		WT Bl6N +LNNA (6) vs. WT Bl6N +LNNA+INDO (4)			-0.4602	-23,42 to 22,50	No	ns		WT Bl6N +LNNA (6) vs. WT Bl6N +LNNA+INDO (4)			9.187	-13,77 to 32,14	No	ns
	WT Bl6N +LNNA (6) vs. Esr1-/- CTL (8)			0	-19,21 to 19,21	No	ns		WT Bl6N +LNNA (6) vs. Esr1-/- CTL (8)			-10.29	-29,50 to 8,915	No	ns		WT Bl6N +LNNA (6) vs. Esr1-/- CTL (8)			-14.14	-33,35 to 5,065	No	ns
	WT Bl6N +LNNA (6) vs. Esr1-/- (9) LNNA			0	-18,74 to 18,74	No	ns		WT Bl6N +LNNA (6) vs. Esr1-/- (9) LNNA			1.433	-17,31 to 20,18	No	ns		WT Bl6N +LNNA (6) vs. Esr1-/- (9) LNNA			-4.977	-23,72 to 13,77	No	ns
	WT Bl6N +LNNA (6) vs. Esr1-/- (5) LNNA+INDO			0	-21,54 to 21,54	No	ns		WT Bl6N +LNNA (6) vs. Esr1-/- (5) LNNA+INDO			-1.706	-23,24 to 19,83	No	ns		WT Bl6N +LNNA (6) vs. Esr1-/- (5) LNNA+INDO			-6.496	-28,03 to 15,04	No	ns
	WT Bl6N +LNNA (6) vs. Esr1 +/+			0	-18,37 to 18,37	No	ns		WT Bl6N +LNNA (6) vs. Esr1 +/+			-20.29	-38,66 to -1,929	Yes	*		WT Bl6N +LNNA (6) vs. Esr1 +/+			-32.32	-50,69 to -13,96	Yes	****
	WT Bl6N +LNNA+INDO (4) vs. Esr1-/- CTL (8)			0	-21,78 to 21,78	No	ns		WT Bl6N +LNNA+INDO (4) vs. Esr1-/- CTL (8)			-9.832	-31,61 to 11,95	No	ns		WT Bl6N +LNNA+INDO (4) vs. Esr1-/- CTL (8)			-23.33	-45,11 to -1,550	Yes	*
	WT Bl6N +LNNA+INDO (4) vs. Esr1-/- (9) LNNA			0	-21,37 to 21,37	No	ns		WT Bl6N +LNNA+INDO (4) vs. Esr1-/- (9) LNNA			1.893	-19,48 to 23,27	No	ns		WT Bl6N +LNNA+INDO (4) vs. Esr1-/- (9) LNNA			-14.16	-35,54 to 7,208	No	ns
	WT Bl6N +LNNA+INDO (4) vs. Esr1-/- (5) LNNA+INDO			0	-23,86 to 23,86	No	ns		WT Bl6N +LNNA+INDO (4) vs. Esr1-/- (5) LNNA+INDO			-1.245	-25,10 to 22,61	No	ns		WT Bl6N +LNNA+INDO (4) vs. Esr1-/- (5) LNNA+INDO			-15.68	-39,54 to 8,176	No	ns
	WT Bl6N +LNNA+INDO (4) vs. Esr1 +/+			0	-21,04 to 21,04	No	ns		WT Bl6N +LNNA+INDO (4) vs. Esr1 +/+			-19.83	-40,87 to 1,206	No	ns		WT Bl6N +LNNA+INDO (4) vs. Esr1 +/+			-41.51	-62,55 to -20,47	Yes	****
	Esr1-/- CTL (8) vs. Esr1-/- (9) LNNA			0	-17,28 to 17,28	No	ns		Esr1-/- CTL (8) vs. Esr1-/- (9) LNNA			11.73	-5,556 to 29,01	No	ns		Esr1-/- CTL (8) vs. Esr1-/- (9) LNNA			9.165	-8,116 to 26,45	No	ns
	Esr1-/- CTL (8) vs. Esr1-/- (5) LNNA+INDO			0	-20,28 to 20,28	No	ns		Esr1-/- CTL (8) vs. Esr1-/- (5) LNNA+INDO			8.587	-11,69 to 28,86	No	ns		Esr1-/- CTL (8) vs. Esr1-/- (5) LNNA+INDO			7.647	-12,63 to 27,92	No	ns
	Esr1-/- CTL (8) vs. Esr1 +/+			0	-16,87 to 16,87	No	ns		Esr1-/- CTL (8) vs. Esr1 +/+			-10	-26,87 to 6,868	No	ns		Esr1-/- CTL (8) vs. Esr1 +/+			-18.18	-35,05 to -1,313	Yes	*
	Esr1-/- (9) LNNA vs. Esr1-/- (5) LNNA+INDO			0	-19,84 to 19,84	No	ns		Esr1-/- (9) LNNA vs. Esr1-/- (5) LNNA+INDO			-3.139	-22,98 to 16,70	No	ns		Esr1-/- (9) LNNA vs. Esr1-/- (5) LNNA+INDO			-1.519	-21,36 to 18,32	No	ns
	Esr1-/- (9) LNNA vs. Esr1 +/+			0	-16,34 to 16,34	No	ns		Esr1-/- (9) LNNA vs. Esr1 +/+			-21.73	-38,07 to -5,387	Yes	**		Esr1-/- (9) LNNA vs. Esr1 +/+			-27.35	-43,69 to -11,01	Yes	****
	Esr1-/- (5) LNNA+INDO vs. Esr1 +/+			0	-19,48 to 19,48	No	ns		Esr1-/- (5) LNNA+INDO vs. Esr1 +/+			-18.59	-38,07 to 0,8908	No	ns		Esr1-/- (5) LNNA+INDO vs. Esr1 +/+			-25.83	-45,31 to -6,350	Yes	**
	Row 2								Row 5
	WT Bl6N +LNNA (6) vs. WT Bl6N +LNNA+INDO (4)			-1.222	-24,18 to 21,73	No	ns		WT Bl6N +LNNA (6) vs. WT Bl6N +LNNA+INDO (4)			8.297	-14,66 to 31,25	No	ns
	WT Bl6N +LNNA (6) vs. Esr1-/- CTL (8)			-1.961	-21,17 to 17,25	No	ns		WT Bl6N +LNNA (6) vs. Esr1-/- CTL (8)			-13.31	-32,52 to 5,893	No	ns
	WT Bl6N +LNNA (6) vs. Esr1-/- (9) LNNA			-0.3908	-19,14 to 18,35	No	ns		WT Bl6N +LNNA (6) vs. Esr1-/- (9) LNNA			-1.878	-20,62 to 16,87	No	ns
	WT Bl6N +LNNA (6) vs. Esr1-/- (5) LNNA+INDO			-1.236	-22,77 to 20,30	No	ns		WT Bl6N +LNNA (6) vs. Esr1-/- (5) LNNA+INDO			-7.021	-28,56 to 14,51	No	ns
	WT Bl6N +LNNA (6) vs. Esr1 +/+			-5.487	-23,85 to 12,88	No	ns		WT Bl6N +LNNA (6) vs. Esr1 +/+			-30.23	-48,60 to -11,87	Yes	****
	WT Bl6N +LNNA+INDO (4) vs. Esr1-/- CTL (8)			-0.7388	-22,52 to 21,04	No	ns		WT Bl6N +LNNA+INDO (4) vs. Esr1-/- CTL (8)			-21.61	-43,39 to 0,1679	No	ns
	WT Bl6N +LNNA+INDO (4) vs. Esr1-/- (9) LNNA			0.8316	-20,54 to 22,20	No	ns		WT Bl6N +LNNA+INDO (4) vs. Esr1-/- (9) LNNA			-10.17	-31,55 to 11,20	No	ns
	WT Bl6N +LNNA+INDO (4) vs. Esr1-/- (5) LNNA+INDO			-0.01319	-23,87 to 23,84	No	ns		WT Bl6N +LNNA+INDO (4) vs. Esr1-/- (5) LNNA+INDO			-15.32	-39,17 to 8,541	No	ns
	WT Bl6N +LNNA+INDO (4) vs. Esr1 +/+			-4.265	-25,31 to 16,78	No	ns		WT Bl6N +LNNA+INDO (4) vs. Esr1 +/+			-38.53	-59,57 to -17,49	Yes	****
	Esr1-/- CTL (8) vs. Esr1-/- (9) LNNA			1.57	-15,71 to 18,85	No	ns		Esr1-/- CTL (8) vs. Esr1-/- (9) LNNA			11.44	-5,845 to 28,72	No	ns
	Esr1-/- CTL (8) vs. Esr1-/- (5) LNNA+INDO			0.7256	-19,55 to 21,00	No	ns		Esr1-/- CTL (8) vs. Esr1-/- (5) LNNA+INDO			6.294	-13,98 to 26,57	No	ns
	Esr1-/- CTL (8) vs. Esr1 +/+			-3.526	-20,40 to 13,34	No	ns		Esr1-/- CTL (8) vs. Esr1 +/+			-16.92	-33,79 to -0,04886	Yes	*
	Esr1-/- (9) LNNA vs. Esr1-/- (5) LNNA+INDO			-0.8447	-20,68 to 18,99	No	ns		Esr1-/- (9) LNNA vs. Esr1-/- (5) LNNA+INDO			-5.142	-24,98 to 14,69	No	ns
	Esr1-/- (9) LNNA vs. Esr1 +/+			-5.096	-21,44 to 11,24	No	ns		Esr1-/- (9) LNNA vs. Esr1 +/+			-28.36	-44,70 to -12,01	Yes	****
	Esr1-/- (5) LNNA+INDO vs. Esr1 +/+			-4.252	-23,73 to 15,23	No	ns		Esr1-/- (5) LNNA+INDO vs. Esr1 +/+			-23.21	-42,69 to -3,733	Yes	**
	Row 3								Row 6
	WT Bl6N +LNNA vs. WT Bl6N +LNNA+INDO (4)			1.033	-21,92 to 23,99	No	ns		WT Bl6N +LNNA (6) vs. WT Bl6N +LNNA+INDO (4)			8.393	-14,56 to 31,35	No	ns
	WT Bl6N +LNNA vs. Esr1-/- CTL (8)			-7.292	-26,50 to 11,92	No	ns		WT Bl6N +LNNA (6) vs. Esr1-/- CTL (8)			-11.5	-30,71 to 7,709	No	ns
	WT Bl6N +LNNA (6) vs. Esr1-/- (9) LNNA			4.95	-13,79 to 23,69	No	ns		WT Bl6N +LNNA (6) vs. Esr1-/- (9) LNNA			-6.442	-25,19 to 12,30	No	ns
	WT Bl6N +LNNA (6) vs. Esr1-/- (5) LNNA+INDO			1.414	-20,12 to 22,95	No	ns		WT Bl6N +LNNA (6) vs. Esr1-/- (5) LNNA+INDO			-5.23	-26,77 to 16,31	No	ns
	WT Bl6N +LNNA (6) vs. Esr1 +/+			-10.78	-29,14 to 7,589	No	ns		WT Bl6N +LNNA (6) vs. Esr1 +/+			-32.09	-50,46 to -13,73	Yes	****
	WT Bl6N +LNNA+INDO (4) vs. Esr1-/- CTL (8)			-8.325	-30,10 to 13,45	No	ns		WT Bl6N +LNNA+INDO (4) vs. Esr1-/- CTL (8)			-19.89	-41,67 to 1,887	No	ns
	WT Bl6N +LNNA+INDO (4) vs. Esr1-/- (9) LNNA			3.917	-17,46 to 25,29	No	ns		WT Bl6N +LNNA+INDO (4) vs. Esr1-/- (9) LNNA			-14.84	-36,21 to 6,536	No	ns
	WT Bl6N +LNNA+INDO (4) vs. Esr1-/- (5) LNNA+INDO			0.3808	-23,48 to 24,24	No	ns		WT Bl6N +LNNA+INDO (4) vs. Esr1-/- (5) LNNA+INDO			-13.62	-37,48 to 10,24	No	ns
	WT Bl6N +LNNA+INDO (4) vs. Esr1 +/+			-11.81	-32,85 to 9,230	No	ns		WT Bl6N +LNNA+INDO (4) vs. Esr1 +/+			-40.48	-61,52 to -19,44	Yes	****
	Esr1-/- CTL (8) vs. Esr1-/- (9) LNNA			12.24	-5,040 to 29,52	No	ns		Esr1-/- CTL (8) vs. Esr1-/- (9) LNNA			5.056	-12,23 to 22,34	No	ns
	Esr1-/- CTL (8) vs. Esr1-/- (5) LNNA+INDO			8.706	-11,57 to 28,98	No	ns		Esr1-/- CTL (8) vs. Esr1-/- (5) LNNA+INDO			6.269	-14,01 to 26,54	No	ns
	Esr1-/- CTL (8) vs. Esr1 +/+			-3.485	-20,36 to 13,38	No	ns		Esr1-/- CTL (8) vs. Esr1 +/+			-20.59	-37,46 to -3,723	Yes	**
	Esr1-/- (9) LNNA vs. Esr1-/- (5) LNNA+INDO			-3.536	-23,37 to 16,30	No	ns		Esr1-/- (9) LNNA vs. Esr1-/- (5) LNNA+INDO			1.213	-18,62 to 21,05	No	ns
	Esr1-/- (9) LNNA vs. Esr1 +/+			-15.73	-32,07 to 0,6136	No	ns		Esr1-/- (9) LNNA vs. Esr1 +/+			-25.65	-41,99 to -9,308	Yes	****
	Esr1-/- (5) LNNA+INDO vs. Esr1 +/+			-12.19	-31,67 to 7,288	No	ns		Esr1-/- (5) LNNA+INDO vs. Esr1 +/+			-26.86	-46,34 to -7,382	Yes	***
	Figure 4, panel B
	Flow rate	% dilation		WT								Flow rate	% dilation		C451A-ERα
	3	0	0	0	0	0	0					3	0	0	0	0	0	0	0	0	0	0	0	0	0	0
	6	1.25	5.05051	0.278351	0.34615	0.21622	1.36364					6	23.81	0	21.429	16.6667	23.478	3.252	9.174	7.778	6.202	5.042	21.2121	4.87805	5.88235	2.88462
	9	28.75	31.3131	10.6186	2.11539	10	12.7273					9	44.444	0	35.714	4.44444	28.696	8.943	11.927	12.222	11.628	10.924	37.8788	7.31707	6.72269	3.84615
	15	43.75	37.3737	38.4536	12.6923	20.8108	26.3636					15	47.619	0	35.714	20	42.609	7.317	13.761	6.667	20.155	23.529	45.4545	8.94309	11.7647	4.80769
	21	66.25	43.4344	54.9485	48.0769	37.973	37.7273					21	50.794	9.677	65.714	43.3333	45.217	9.756	13.761	4.444	35.659	31.933	75.7576	19.5122	24.3697	13.4615
	30	76.25	45.4545	66.2886	59.6154	42.7838	43.4091					30	49.206	19.355	72.857	54.4444	47.826	12.195	17.431	5.556	44.186	42.017	89.3939	29.2683	38.6555	28.8462
	50	76.25	38.3838	67.3196	56.7308	45.1351	45.4091					50	52.381	29.032	84.286	54.4444	38.261	11.382	19.266	18.889	37.984	44.538	78.7879	28.4553	37.8151	30.7692
	Flow rate	% dilation		WT	with LNNA							Flow rate	% dilation		C451A-ERα	with LNNA
	3	0	0	0	0	0	0	0	0	0		3	0	0	0	0	0	0
	6	4.286	-3.846	9.836	5.926	4.63	2.874	1.878	3.2967	0.581		6	8.85	12.844	1.176	6.28272	2.548	11.561
	9	-1.429	-3.846	19.672	8.889	10.185	4.023	2.817	3.2967	3.488		9	12.389	14.679	2.353	15.1832	4.459	21.387
	15	1.429	-2.885	22.951	12.593	18.519	6.322	6.573	3.2967	2.326		15	20.354	11.927	1.765	28.7958	7.643	30.058
	21	4.286	2.404	27.869	31.852	24.074	23.563	15.962	8.24176	8.14		21	31.858	24.771	7.059	44.5026	10.191	36.416
	30	15.714	-1.442	26.23	42.222	25.926	37.356	23.005	18.6813	9.302		30	41.593	29.358	11.765	48.6911	12.102	34.682
	50	21.429	0	26.23	48.889	25	37.931	23.474	13.7363	8.721		50	38.938	32.11	12.941	49.2147	14.65	32.948
	Flow rate	% dilation		WT	with LNNA and indo							Flow rate	% dilation	C451A-ERα	with LNNA and indo
	3	0	0	0	0							3	0	0	0	0
	6	13.58	10.169	1.676	2.7							6	4.878	5.224	2.762	8.383
	9	20.988	20.339	0.559	6.197							9	4.268	13.433	14.917	8.982
	15	35.802	23.729	2.235	6.048							15	7.317	17.164	16.575	16.168
	21	28.395	22.599	7.821	4.83							21	10.976	27.612	17.68	14.97
	30	37.037	31.638	11.173	8.354							30	15.854	30.597	20.994	17.365
	50	25.926	36.158	2.793	11.062							50	17.683	32.836	21.547	14.371
	Bonferroni's multiple comparisons test			Mean Diff,	95% CI of diff,	Significant?	Summary		Bonferroni's multiple comparisons test			Mean Diff,	95% CI of diff,	Significant?	Summary		Bonferroni's multiple comparisons test			Mean Diff,	95% CI of diff,	Significant?	Summary
	Row 1								Row 4
	WT Bl6N +LNNA vs. C451A-/- +LNNA			0	-20,68 to 20,68	No	ns		WT Bl6N +LNNA vs. C451A-/- +LNNA			-0.2639	-20,95 to 20,42	No	ns		Row 7
	WT Bl6N +LNNA vs. WT Bl6N +LNNA+INDO			0	-23,12 to 23,12	No	ns		WT Bl6N +LNNA vs. WT Bl6N +LNNA+INDO			-0.4602	-23,58 to 22,66	No	ns		WT Bl6N +LNNA vs. C451A-/- +LNNA			-1.962	-22,65 to 18,72	No	ns
	WT Bl6N +LNNA vs. C451A-/- +LNNA+INDO			0	-23,12 to 23,12	No	ns		WT Bl6N +LNNA vs. C451A-/- +LNNA+INDO			2.187	-20,94 to 25,31	No	ns		WT Bl6N +LNNA vs. WT Bl6N +LNNA+INDO			9.187	-13,94 to 32,31	No	ns
	WT Bl6N +LNNA vs. WT Bl6N			0	-20,68 to 20,68	No	ns		WT Bl6N +LNNA vs. WT Bl6N			-13.64	-34,33 to 7,038	No	ns		WT Bl6N +LNNA vs. C451A-/- +LNNA+INDO+MSPPOH			7.628	-17,70 to 32,96	No	ns
	C451A-/- +LNNA vs. WT Bl6N +LNNA+INDO			0	-23,12 to 23,12	No	ns		C451A-/- +LNNA vs. WT Bl6N +LNNA+INDO			-0.1964	-23,32 to 22,93	No	ns		WT Bl6N +LNNA vs. WT Bl6N			-16.08	-36,76 to 4,606	No	ns
	C451A-/- +LNNA vs. C451A-/- +LNNA+INDO			0	-23,12 to 23,12	No	ns		C451A-/- +LNNA vs. C451A-/- +LNNA+INDO			2.451	-20,67 to 25,58	No	ns		C451A-/- +LNNA vs. WT Bl6N +LNNA+INDO			11.15	-11,98 to 34,27	No	ns
	C451A-/- +LNNA vs. WT Bl6N			0	-20,68 to 20,68	No	ns		C451A-/- +LNNA vs. WT Bl6N			-13.38	-34,06 to 7,302	No	ns		C451A-/- +LNNA vs. C451A-/- +LNNA+INDO+MSPPOH			9.591	-15,74 to 34,92	No	ns
	WT Bl6N +LNNA+INDO vs. C451A-/- +LNNA+INDO			0	-25,33 to 25,33	No	ns		WT Bl6N +LNNA+INDO vs. C451A-/- +LNNA+INDO			2.648	-22,68 to 27,98	No	ns		C451A-/- +LNNA vs. WT Bl6N			-14.11	-34,80 to 6,568	No	ns
	WT Bl6N +LNNA+INDO vs. WT Bl6N			0	-23,12 to 23,12	No	ns		WT Bl6N +LNNA+INDO vs. WT Bl6N			-13.18	-36,31 to 9,940	No	ns		WT Bl6N +LNNA+INDO vs. C451A-/- +LNNA+INDO+MSPPOH			-1.558	-28,92 to 25,80	No	ns
	C451A-/- +LNNA+INDO vs. WT Bl6N			0	-23,12 to 23,12	No	ns		C451A-/- +LNNA+INDO vs. WT Bl6N			-15.83	-38,96 to 7,292	No	ns		C451A-/- +LNNA+INDO vs. C451A-/- +LNNA+INDO+MSPPOH			1.066	-26,29 to 28,43	No	ns
																	C451A-/- +LNNA+INDO+MSPPOH vs. WT Bl6N			-23.71	-49,04 to 1,626	No	ns
	Row 2								Row 5
	WT Bl6N +LNNA vs. C451A-/- +LNNA			-1.401	-22,08 to 19,28	No	ns		WT Bl6N +LNNA vs. C451A-/- +LNNA			-1.592	-22,27 to 19,09	No	ns
	WT Bl6N +LNNA vs. WT Bl6N +LNNA+INDO			-1.222	-24,35 to 21,90	No	ns		WT Bl6N +LNNA vs. WT Bl6N +LNNA+INDO			8.297	-14,83 to 31,42	No	ns
	WT Bl6N +LNNA vs. C451A-/- +LNNA+INDO			0.4972	-22,63 to 23,62	No	ns		WT Bl6N +LNNA vs. C451A-/- +LNNA+INDO			6.398	-16,73 to 29,52	No	ns
	WT Bl6N +LNNA vs. WT Bl6N			-9.42	-30,10 to 11,26	No	ns		WT Bl6N +LNNA vs. WT Bl6N			-19.72	-40,40 to 0,9679	No	ns
	C451A-/- +LNNA vs. WT Bl6N +LNNA+INDO			0.179	-22,95 to 23,30	No	ns		C451A-/- +LNNA vs. WT Bl6N +LNNA+INDO			9.888	-13,24 to 33,01	No	ns
	C451A-/- +LNNA vs. C451A-/- +LNNA+INDO			1.899	-21,23 to 25,02	No	ns		C451A-/- +LNNA vs. C451A-/- +LNNA+INDO			7.99	-15,13 to 31,11	No	ns
	C451A-/- +LNNA vs. WT Bl6N			-8.019	-28,70 to 12,66	No	ns		C451A-/- +LNNA vs. WT Bl6N			-18.12	-38,81 to 2,560	No	ns
	WT Bl6N +LNNA+INDO vs. C451A-/- +LNNA+INDO			1.72	-23,61 to 27,05	No	ns		WT Bl6N +LNNA+INDO vs. C451A-/- +LNNA+INDO			-1.898	-27,23 to 23,43	No	ns
	WT Bl6N +LNNA+INDO vs. WT Bl6N			-8.198	-31,32 to 14,93	No	ns		WT Bl6N +LNNA+INDO vs. WT Bl6N			-28.01	-51,14 to -4,887	Yes	**
	C451A-/- +LNNA+INDO vs. WT Bl6N			-9.917	-33,04 to 13,21	No	ns		C451A-/- +LNNA+INDO vs. WT Bl6N			-26.11	-49,24 to -2,989	Yes	*
	Row 3								Row 6
	WT Bl6N +LNNA vs. C451A-/- +LNNA			1.312	-19,37 to 22,00	No	ns		WT Bl6N +LNNA vs. C451A-/- +LNNA			0.7449	-19,94 to 21,43	No	ns
	WT Bl6N +LNNA vs. WT Bl6N +LNNA+INDO			1.033	-22,09 to 24,16	No	ns		WT Bl6N +LNNA vs. WT Bl6N +LNNA+INDO			8.393	-14,73 to 31,52	No	ns
	WT Bl6N +LNNA vs. C451A-/- +LNNA+INDO			2.654	-20,47 to 25,78	No	ns		WT Bl6N +LNNA vs. C451A-/- +LNNA+INDO			9.241	-13,88 to 32,37	No	ns
	WT Bl6N +LNNA vs. WT Bl6N			-10.2	-30,88 to 10,49	No	ns		WT Bl6N +LNNA vs. WT Bl6N			-28.26	-48,95 to -7,580	Yes	***
	C451A-/- +LNNA vs. WT Bl6N +LNNA+INDO			-0.279	-23,40 to 22,85	No	ns		C451A-/- +LNNA vs. WT Bl6N +LNNA+INDO			7.648	-15,48 to 30,77	No	ns
	C451A-/- +LNNA vs. C451A-/- +LNNA+INDO			1.342	-21,78 to 24,47	No	ns		C451A-/- +LNNA vs. C451A-/- +LNNA+INDO			8.496	-14,63 to 31,62	No	ns
	C451A-/- +LNNA vs. WT Bl6N			-11.51	-32,19 to 9,174	No	ns		C451A-/- +LNNA vs. WT Bl6N			-29.01	-49,69 to -8,325	Yes	***
	WT Bl6N +LNNA+INDO vs. C451A-/- +LNNA+INDO			1.621	-23,71 to 26,95	No	ns		WT Bl6N +LNNA+INDO vs. C451A-/- +LNNA+INDO			0.848	-24,48 to 26,18	No	ns
	WT Bl6N +LNNA+INDO vs. WT Bl6N			-11.23	-34,35 to 11,89	No	ns		WT Bl6N +LNNA+INDO vs. WT Bl6N			-36.66	-59,78 to -13,53	Yes	****
	C451A-/- +LNNA+INDO vs. WT Bl6N			-12.85	-35,98 to 10,27	No	ns		C451A-/- +LNNA+INDO vs. WT Bl6N			-37.5	-60,63 to -14,38	Yes	****
	Figure 4 C
	FLOW	% dilation		WT								FLOW	% dilation	R264A-ERα
	3	0	0	0	0	0	0					3	0	0	0	0	0	0	0
	6	1.25	5.05051	0.278351	0.34615	0.21622	1.36364					6	10.6061	11	20	3.681	23.81	3.061	4.31
	9	28.75	31.3131	10.6186	2.11539	10	12.7273					9	18.1818	26	20	6.314	-5.952	18.367	6.897
	15	43.75	37.3737	38.4536	12.6923	20.8108	26.3636					15	36.3636	41	20	8.948	21.429	31.633	9.483
	21	66.25	43.4344	54.9485	48.0769	37.973	37.7273					21	39.3939	38	27.1	13.112	33.333	41.837	18.103
	30	76.25	45.4545	66.2886	59.6154	42.7838	43.4091					30	57.5758	37	29.03	21.922	32.143	57.143	20.69
	50	76.25	38.3838	67.3196	56.7308	45.1351	45.4091					50	59.0909	37	33.55	21.922	25	51.02	16.379
	FLOW	% dilation		WT	with LNNA							FLOW	% dilation	R264A-ERα	with LNNA
	3	0	0	0	0	0	0	0	0	0		3	0	0	0	0
	6	4.286	-3.846	9.836	5.926	4.63	2.874	1.878	3.2967	0.581		6	7.65	10.377	6.18	0.503
	9	-1.429	-3.846	19.672	8.889	10.185	4.023	2.817	3.2967	3.488		9	9.836	14.151	5.056	1.508
	15	1.429	-2.885	22.951	12.593	18.519	6.322	6.573	3.2967	2.326		15	18.743	8.491	1.685	15.528
	21	4.286	2.404	27.869	31.852	24.074	23.563	15.962	8.24176	8.14		21	26.94	6.604	9.551	37.588
	30	15.714	-1.442	26.23	42.222	25.926	37.356	23.005	18.6813	9.302		30	23.115	8.491	10.562	43.166
	50	21.429	0	26.23	48.889	25	37.931	23.474	13.7363	8.721		50	27.486	9.434	6.742	33.065
	FLOW	% dilation		WT	with LNNA and indo							FLOW	% dilation	R264A-ERα	with LNNA and indo
	3	0	0	0	0							3	0	0	0	0
	6	13.58	10.169	1.676	2.7							6	0	5.6	-0.518	9.804
	9	20.988	20.339	0.559	6.197							9	0	4	1.036	14.706
	15	35.802	23.729	2.235	6.048							15	10.345	5.6	2.591	23.725
	21	28.395	22.599	7.821	4.83							21	18.391	1.6	15.544	28.627
	30	37.037	31.638	11.173	8.354							30	24.138	3.2	14.663	33.529
	50	25.926	36.158	2.793	11.062							50	16.092	6.4	1.554	29.804
	Bonferroni's multiple comparisons test			Mean Diff,	95% CI of diff,	Significant?	Summary		Bonferroni's multiple comparisons test			Mean Diff,	95% CI of diff,	Significant?	Summary		Bonferroni's multiple comparisons test			Mean Diff,	95% CI of diff,	Significant?	Summary
	Row 1								Row 4								Row 7
	WT Bl6N +LNNA vs. R264A-/- +LNNA			0	-24,16 to 24,16	No	ns		WT Bl6N +LNNA vs. R264A-/- +LNNA			5.382	-18,78 to 29,55	No	ns		WT Bl6N +LNNA vs. R264A-/- +LNNA			8.99	-15,17 to 33,15	No	ns
	WT Bl6N +LNNA vs. WT Bl6N +LNNA+INDO			0	-24,16 to 24,16	No	ns		WT Bl6N +LNNA vs. WT Bl6N +LNNA+INDO			-0.4602	-24,62 to 23,70	No	ns		WT Bl6N +LNNA vs. WT Bl6N +LNNA+INDO			9.187	-14,98 to 33,35	No	ns
	WT Bl6N +LNNA vs. R264A-/- +LNNA+INDO			0	-24,16 to 24,16	No	ns		WT Bl6N +LNNA vs. R264A-/- +LNNA+INDO			5.928	-18,24 to 30,09	No	ns		WT Bl6N +LNNA vs. R264A-/- +LNNA+INDO			14.71	-9,455 to 38,87	No	ns
	WT Bl6N +LNNA vs. WT Bl6N			0	-21,61 to 21,61	No	ns		WT Bl6N +LNNA vs. WT Bl6N			-13.64	-35,26 to 7,969	No	ns		WT Bl6N +LNNA vs. WT Bl6N			-16.08	-37,69 to 5,536	No	ns
	WT Bl6N +LNNA vs. R264-/-			0	-19,33 to 19,33	No	ns		WT Bl6N +LNNA vs. R264-/-			-3.225	-22,56 to 16,11	No	ns		WT Bl6N +LNNA vs. R264-/-			3.078	-16,25 to 22,41	No	ns
	R264A-/- +LNNA vs. WT Bl6N +LNNA+INDO			0	-26,47 to 26,47	No	ns		R264A-/- +LNNA vs. WT Bl6N +LNNA+INDO			-5.842	-32,31 to 20,63	No	ns		R264A-/- +LNNA vs. WT Bl6N +LNNA+INDO			0.197	-26,27 to 26,67	No	ns
	R264A-/- +LNNA vs. R264A-/- +LNNA+INDO			0	-26,47 to 26,47	No	ns		R264A-/- +LNNA vs. R264A-/- +LNNA+INDO			0.5465	-25,92 to 27,02	No	ns		R264A-/- +LNNA vs. R264A-/- +LNNA+INDO			5.719	-20,75 to 32,19	No	ns
	R264A-/- +LNNA vs. WT Bl6N			0	-24,16 to 24,16	No	ns		R264A-/- +LNNA vs. WT Bl6N			-19.03	-43,19 to 5,138	No	ns		R264A-/- +LNNA vs. WT Bl6N			-25.07	-49,23 to -0,9025	Yes	*
	R264A-/- +LNNA vs. R264-/-			0	-22,15 to 22,15	No	ns		R264A-/- +LNNA vs. R264-/-			-8.607	-30,75 to 13,54	No	ns		R264A-/- +LNNA vs. R264-/-			-5.912	-28,06 to 16,24	No	ns
	WT Bl6N +LNNA+INDO vs. R264A-/- +LNNA+INDO			0	-26,47 to 26,47	No	ns		WT Bl6N +LNNA+INDO vs. R264A-/- +LNNA+INDO			6.388	-20,08 to 32,86	No	ns		WT Bl6N +LNNA+INDO vs. R264A-/- +LNNA+INDO			5.522	-20,95 to 31,99	No	ns
	WT Bl6N +LNNA+INDO vs. WT Bl6N			0	-24,16 to 24,16	No	ns		WT Bl6N +LNNA+INDO vs. WT Bl6N			-13.18	-37,35 to 10,98	No	ns		WT Bl6N +LNNA+INDO vs. WT Bl6N			-25.26	-49,43 to -1,100	Yes	*
	WT Bl6N +LNNA+INDO vs. R264-/-			0	-22,15 to 22,15	No	ns		WT Bl6N +LNNA+INDO vs. R264-/-			-2.765	-24,91 to 19,38	No	ns		WT Bl6N +LNNA+INDO vs. R264-/-			-6.109	-28,26 to 16,04	No	ns
	R264A-/- +LNNA+INDO vs. WT Bl6N			0	-24,16 to 24,16	No	ns		R264A-/- +LNNA+INDO vs. WT Bl6N			-19.57	-43,74 to 4,592	No	ns		R264A-/- +LNNA+INDO vs. WT Bl6N			-30.79	-54,95 to -6,622	Yes	**
	R264A-/- +LNNA+INDO vs. R264-/-			0	-22,15 to 22,15	No	ns		R264A-/- +LNNA+INDO vs. R264-/-			-9.153	-31,30 to 12,99	No	ns		R264A-/- +LNNA+INDO vs. R264-/-			-11.63	-33,78 to 10,52	No	ns
	WT Bl6N vs. R264-/-			0	-19,33 to 19,33	No	ns		WT Bl6N vs. R264-/-			10.42	-8,912 to 29,75	No	ns		WT Bl6N vs. R264-/-			19.16	-0,1763 to 38,49	No	ns
	Row 2								Row 5
	WT Bl6N +LNNA vs. R264A-/- +LNNA			-0.3686	-24,53 to 23,80	No	ns		WT Bl6N +LNNA vs. R264A-/- +LNNA			4.037	-20,13 to 28,20	No	ns
	WT Bl6N +LNNA vs. WT Bl6N +LNNA+INDO			-1.222	-25,39 to 22,94	No	ns		WT Bl6N +LNNA vs. WT Bl6N +LNNA+INDO			8.297	-15,87 to 32,46	No	ns
	WT Bl6N +LNNA vs. R264A-/- +LNNA+INDO			2.087	-22,08 to 26,25	No	ns		WT Bl6N +LNNA vs. R264A-/- +LNNA+INDO			8.167	-16,00 to 32,33	No	ns
	WT Bl6N +LNNA vs. WT Bl6N			-9.42	-31,03 to 12,19	No	ns		WT Bl6N +LNNA vs. WT Bl6N			-19.72	-41,33 to 1,898	No	ns
	WT Bl6N +LNNA vs. R264-/-			0.5299	-18,80 to 19,86	No	ns		WT Bl6N +LNNA vs. R264-/-			-3.505	-22,84 to 15,83	No	ns
	R264A-/- +LNNA vs. WT Bl6N +LNNA+INDO			-0.8538	-27,32 to 25,62	No	ns		R264A-/- +LNNA vs. WT Bl6N +LNNA+INDO			4.26	-22,21 to 30,73	No	ns
	R264A-/- +LNNA vs. R264A-/- +LNNA+INDO			2.456	-24,01 to 28,93	No	ns		R264A-/- +LNNA vs. R264A-/- +LNNA+INDO			4.13	-22,34 to 30,60	No	ns
	R264A-/- +LNNA vs. WT Bl6N			-9.052	-33,22 to 15,11	No	ns		R264A-/- +LNNA vs. WT Bl6N			-23.75	-47,92 to 0,4122	No	ns
	R264A-/- +LNNA vs. R264-/-			0.8985	-21,25 to 23,05	No	ns		R264A-/- +LNNA vs. R264-/-			-7.542	-29,69 to 14,61	No	ns
	WT Bl6N +LNNA+INDO vs. R264A-/- +LNNA+INDO			3.31	-23,16 to 29,78	No	ns		WT Bl6N +LNNA+INDO vs. R264A-/- +LNNA+INDO			-0.1293	-26,60 to 26,34	No	ns
	WT Bl6N +LNNA+INDO vs. WT Bl6N			-8.198	-32,36 to 15,97	No	ns		WT Bl6N +LNNA+INDO vs. WT Bl6N			-28.01	-52,18 to -3,847	Yes	*
	WT Bl6N +LNNA+INDO vs. R264-/-			1.752	-20,39 to 23,90	No	ns		WT Bl6N +LNNA+INDO vs. R264-/-			-11.8	-33,95 to 10,35	No	ns
	R264A-/- +LNNA+INDO vs. WT Bl6N			-11.51	-35,67 to 12,66	No	ns		R264A-/- +LNNA+INDO vs. WT Bl6N			-27.88	-52,05 to -3,718	Yes	*
	R264A-/- +LNNA+INDO vs. R264-/-			-1.558	-23,70 to 20,59	No	ns		R264A-/- +LNNA+INDO vs. R264-/-			-11.67	-33,82 to 10,47	No	ns
	WT Bl6N vs. R264-/-			9.95	-9,381 to 29,28	No	ns		WT Bl6N vs. R264-/-			16.21	-3,121 to 35,54	No	ns
	Row 3								Row 6
	WT Bl6N +LNNA vs. R264A-/- +LNNA			5.416	-18,75 to 29,58	No	ns		WT Bl6N +LNNA vs. R264A-/- +LNNA			9.11	-15,05 to 33,27	No	ns
	WT Bl6N +LNNA vs. WT Bl6N +LNNA+INDO			1.033	-23,13 to 25,20	No	ns		WT Bl6N +LNNA vs. WT Bl6N +LNNA+INDO			8.393	-15,77 to 32,56	No	ns
	WT Bl6N +LNNA vs. R264A-/- +LNNA+INDO			8.119	-16,05 to 32,28	No	ns		WT Bl6N +LNNA vs. R264A-/- +LNNA+INDO			11.56	-12,60 to 35,73	No	ns
	WT Bl6N +LNNA vs. WT Bl6N			-10.2	-31,81 to 11,42	No	ns		WT Bl6N +LNNA vs. WT Bl6N			-28.26	-49,88 to -6,650	Yes	**
	WT Bl6N +LNNA vs. R264-/-			-0.9755	-20,31 to 18,36	No	ns		WT Bl6N +LNNA vs. R264-/-			-0.5349	-19,87 to 18,80	No	ns
	R264A-/- +LNNA vs. WT Bl6N +LNNA+INDO			-4.383	-30,85 to 22,09	No	ns		R264A-/- +LNNA vs. WT Bl6N +LNNA+INDO			-0.717	-27,19 to 25,75	No	ns
	R264A-/- +LNNA vs. R264A-/- +LNNA+INDO			2.702	-23,77 to 29,17	No	ns		R264A-/- +LNNA vs. R264A-/- +LNNA+INDO			2.451	-24,02 to 28,92	No	ns
	R264A-/- +LNNA vs. WT Bl6N			-15.61	-39,78 to 8,551	No	ns		R264A-/- +LNNA vs. WT Bl6N			-37.37	-61,54 to -13,21	Yes	***
	R264A-/- +LNNA vs. R264-/-			-6.392	-28,54 to 15,76	No	ns		R264A-/- +LNNA vs. R264-/-			-9.645	-31,79 to 12,50	No	ns
	WT Bl6N +LNNA+INDO vs. R264A-/- +LNNA+INDO			7.085	-19,39 to 33,56	No	ns		WT Bl6N +LNNA+INDO vs. R264A-/- +LNNA+INDO			3.168	-23,30 to 29,64	No	ns
	WT Bl6N +LNNA+INDO vs. WT Bl6N			-11.23	-35,39 to 12,93	No	ns		WT Bl6N +LNNA+INDO vs. WT Bl6N			-36.66	-60,82 to -12,49	Yes	***
	WT Bl6N +LNNA+INDO vs. R264-/-			-2.009	-24,16 to 20,14	No	ns		WT Bl6N +LNNA+INDO vs. R264-/-			-8.928	-31,07 to 13,22	No	ns
	R264A-/- +LNNA+INDO vs. WT Bl6N			-18.32	-42,48 to 5,849	No	ns		R264A-/- +LNNA+INDO vs. WT Bl6N			-39.82	-63,99 to -15,66	Yes	****
	R264A-/- +LNNA+INDO vs. R264-/-			-9.094	-31,24 to 13,05	No	ns		R264A-/- +LNNA+INDO vs. R264-/-			-12.1	-34,24 to 10,05	No	ns
	WT Bl6N vs. R264-/-			9.221	-10,11 to 28,55	No	ns		WT Bl6N vs. R264-/-			27.73	8,397 to 47,06	Yes	***
	Figure 4 D
	FLOW	% dilation	WT									Flow rate	% dilation		AF2-ERα
	3	0	0	0	0	0	0	0	0			3	0	0	0	0	0	0	0	0
	6	14.286	9.96	12	18.8235	0.934579	12.676	13.861	7.579			6	9.091	5.333	2.752	15	12.7907	11.494	22.059	0
	9	27.143	10.284	10.667	29.4118	4.6729	33.803	17.822	8.484			9	18.182	9.333	6.422	28.75	22.093	18.391	29.412	3.077
	15	40	25.043	25.333	38.8235	10.2804	42.254	28.713	24.819			15	24.242	14.667	11.009	41.25	34.8837	18.966	44.118	33.846
	21	55.714	49.228	44	52.9412	17.757	53.521	45.545	35.96			21	68.182	21.333	14.679	50	55.8139	25.287	64.706	41.538
	30	62.857	66.653	64	63.5294	34.5794	61.972	73.267	39.204			30	71.212	30.667	14.679	76.25	69.7674	40.805	82.353	76.923
	50	55.714	57.703	56	61.1765	35.514	47.887	70.297	38.117			50	51.515	32	18.349	66.25	55.8139	45.977	83.824	67.692
	FLOW	% dilation	WT + L-NNA									Flow rate	% dilation		AF2-ERα	with LNNA
	3	0	0	0	0	0	0	0	0	0		3	0	0	0	0	0	0
	6	4.286	-3.846	9.836	5.926	4.63	2.874	1.878	3.2967	0.581		6	8.85	12.844	1.176	6.28272	2.548	11.561
	9	-1.429	-3.846	19.672	8.889	10.185	4.023	2.817	3.2967	3.488		9	12.389	14.679	2.353	15.1832	4.459	21.387
	15	1.429	-2.885	22.951	12.593	18.519	6.322	6.573	3.2967	2.326		15	20.354	11.927	1.765	28.7958	7.643	30.058
	21	4.286	2.404	27.869	31.852	24.074	23.563	15.962	8.24176	8.14		21	31.858	24.771	7.059	44.5026	10.191	36.416
	30	15.714	-1.442	26.23	42.222	25.926	37.356	23.005	18.6813	9.302		30	41.593	29.358	11.765	48.6911	12.102	34.682
	50	21.429	0	26.23	48.889	25	37.931	23.474	13.7363	8.721		50	38.938	32.11	12.941	49.2147	14.65	32.948
	FLOW	% dilation	WT + L-NNA + indo									Flow rate	% dilation	AF2-ERα	with LNNA and indo
	3	0	0	0	0	0						3	0	0	0	0	0	0	0	0
	6	9.565	7.767	0.613	2.5	9.62963						6	0	0.649	7.534	3.185	5.426	7.339	0.99	7.563
	9	11.304	14.563	0.613	4.375	16.2963						9	-1.515	1.948	10.959	7.643	12.403	17.431	5.941	5.042
	15	20	23.301	6.135	9.375	24.4444						15	3.03	1.299	13.014	10.828	11.628	24.771	16.832	2.521
	21	18.261	36.893	6.748	10.625	25.1852						21	7.576	1.299	13.699	15.924	20.155	32.11	32.673	6.723
	30	18.261	54.369	15.951	11.875	31.8518						30	7.576	0	15.753	21.019	24.031	33.028	48.515	14.286
	50	13.913	33.01	14.11	6.875	40						50	10.606	0	19.863	21.019	26.357	26.606	46.535	5.042
	ANOVA repeated mesurements
	Bonferroni's multiple comparisons test			Mean Diff,	95% CI of diff,	Significant?	Summary		Bonferroni's multiple comparisons test			Mean Diff,	95% CI of diff,	Significant?	Summary		Bonferroni's multiple comparisons test			Mean Diff,	95% CI of diff,	Significant?	Summary
	Row 1								Row 4								Row 7
	WT +LNNA vs. WT+ LNNA+LNAME			0	-28,00 to 28,00	No	ns		WT +LNNA vs. WT+ LNNA+LNAME			-6.718	-34,72 to 21,28	No	ns		WT +LNNA vs. WT+ LNNA+LNAME			4.148	-23,85 to 32,15	No	ns
	WT +LNNA vs. WT +LNNA+INDO			0	-21,52 to 21,52	No	ns		WT +LNNA vs. WT +LNNA+INDO			-9.051	-30,57 to 12,47	No	ns		WT +LNNA vs. WT +LNNA+INDO			3.839	-17,69 to 25,36	No	ns
	WT +LNNA vs. AF2° +LNAME+INDO			0	-17,40 to 17,40	No	ns		WT +LNNA vs. AF2° +LNAME+INDO			-2.588	-19,99 to 14,82	No	ns		WT +LNNA vs. AF2° +LNAME+INDO			3.32	-14,08 to 20,72	No	ns
	WT +LNNA vs. WT + LNNA+LNAME			0	-17,40 to 17,40	No	ns		WT +LNNA vs. WT + LNNA+LNAME			-21.51	-38,91 to -4,101	Yes	**		WT +LNNA vs. WT + LNNA+LNAME			-29.98	-47,38 to -12,57	Yes	****
	WT +LNNA vs. AF2°			0	-17,40 to 17,40	No	ns		WT +LNNA vs. AF2°			-19.97	-37,37 to -2,565	Yes	**		WT +LNNA vs. AF2°			-29.85	-47,26 to -12,45	Yes	****
	WT + LNNA+LNAME vs. WT +LNNA+INDO			0	-31,02 to 31,02	No	ns		WT + LNNA+LNAME vs. WT +LNNA+INDO			-2.333	-33,35 to 28,69	No	ns		WT + LNNA+LNAME vs. WT +LNNA+INDO			-0.3091	-31,33 to 30,71	No	ns
	WT + LNNA+LNAME vs. AF2° +LNAME+INDO			0	-28,32 to 28,32	No	ns		WT + LNNA+LNAME vs. AF2° +LNAME+INDO			4.13	-24,19 to 32,45	No	ns		WT + LNNA+LNAME vs. AF2° +LNAME+INDO			-0.8278	-29,14 to 27,49	No	ns
	WT + LNNA+LNAME vs. WT +LNNA+INDO			0	-28,32 to 28,32	No	ns		WT + LNNA+LNAME vs. WT +LNNA+INDO			-14.79	-43,10 to 13,53	No	ns		WT + LNNA+LNAME vs. WT +LNNA+INDO			-34.13	-62,44 to -5,808	Yes	**
	WT + LNNA+LNAME vs. AF2°			0	-28,32 to 28,32	No	ns		WT + LNNA+LNAME vs. AF2°			-13.25	-41,57 to 15,06	No	ns		WT + LNNA+LNAME vs. AF2°			-34	-62,32 to -5,685	Yes	**
	WT +LNNA+INDO vs. AF2° +LNAME+INDO			0	-21,93 to 21,93	No	ns		WT +LNNA+INDO vs. AF2° +LNAME+INDO			6.463	-15,47 to 28,40	No	ns		WT +LNNA+INDO vs. AF2° +LNAME+INDO			-0.5187	-22,45 to 21,42	No	ns
	WT +LNNA+INDO vs. WT			0	-21,93 to 21,93	No	ns		WT +LNNA+INDO vs. WT			-12.45	-34,39 to 9,479	No	ns		WT +LNNA+INDO vs. WT			-33.82	-55,75 to -11,88	Yes	****
	WT +LNNA+INDO vs. AF2°			0	-21,93 to 21,93	No	ns		WT +LNNA+INDO vs. AF2°			-10.92	-32,85 to 11,01	No	ns		WT +LNNA+INDO vs. AF2°			-33.69	-55,63 to -11,76	Yes	****
	AF2° +LNAME+INDO vs. WT			0	-17,91 to 17,91	No	ns		AF2° +LNAME+INDO vs. WT			-18.92	-36,83 to -1,009	Yes	*		AF2° +LNAME+INDO vs. WT			-33.3	-51,21 to -15,39	Yes	****
	AF2° +LNAME+INDO vs. AF2°			0	-17,91 to 17,91	No	ns		AF2° +LNAME+INDO vs. AF2°			-17.38	-35,29 to 0,5268	No	ns		AF2° +LNAME+INDO vs. AF2°			-33.17	-51,08 to -15,26	Yes	****
	WT vs. AF2			0	-17,91 to 17,91	No	ns		WT vs. AF2			1.536	-16,37 to 19,44	No	ns		WT vs. AF2			0.1234	-17,79 to 18,03	No	ns
	Row 2								Row 5
	WT +LNNA vs. WT+ LNNA+LNAME			-4.774	-32,77 to 23,23	No	ns		WT +LNNA vs. WT+ LNNA+LNAME			-6.406	-34,41 to 21,59	No	ns
	WT +LNNA vs. WT +LNNA+INDO			-3.758	-25,28 to 17,77	No	ns		WT +LNNA vs. WT +LNNA+INDO			0.3545	-21,17 to 21,88	No	ns
	WT +LNNA vs. AF2° +LNAME+INDO			-0.8122	-18,22 to 16,59	No	ns		WT +LNNA vs. AF2° +LNAME+INDO			-0.004125	-17,41 to 17,40	No	ns
	WT +LNNA vs. WT + LNNA+LNAME			-7.991	-25,40 to 9,413	No	ns		WT +LNNA vs. WT + LNNA+LNAME			-28.07	-45,47 to -10,66	Yes	****
	WT +LNNA vs. AF2°			-6.541	-23,95 to 10,86	No	ns		WT +LNNA vs. AF2°			-26.43	-43,83 to -9,022	Yes	****
	WT + LNNA+LNAME vs. WT +LNNA+INDO			1.016	-30,00 to 32,04	No	ns		WT + LNNA+LNAME vs. WT +LNNA+INDO			6.76	-24,26 to 37,78	No	ns
	WT + LNNA+LNAME vs. AF2° +LNAME+INDO			3.962	-24,35 to 32,28	No	ns		WT + LNNA+LNAME vs. AF2° +LNAME+INDO			6.402	-21,92 to 34,72	No	ns
	WT + LNNA+LNAME vs. WT +LNNA+INDO			-3.217	-31,53 to 25,10	No	ns		WT + LNNA+LNAME vs. WT +LNNA+INDO			-21.66	-49,98 to 6,655	No	ns
	WT + LNNA+LNAME vs. AF2°			-1.767	-30,08 to 26,55	No	ns		WT + LNNA+LNAME vs. AF2°			-20.02	-48,34 to 8,296	No	ns
	WT +LNNA+INDO vs. AF2° +LNAME+INDO			2.946	-18,99 to 24,88	No	ns		WT +LNNA+INDO vs. AF2° +LNAME+INDO			-0.3586	-22,29 to 21,58	No	ns
	WT +LNNA+INDO vs. WT			-4.234	-26,17 to 17,70	No	ns		WT +LNNA+INDO vs. WT			-28.42	-50,36 to -6,488	Yes	**
	WT +LNNA+INDO vs. AF2°			-2.784	-24,72 to 19,15	No	ns		WT +LNNA+INDO vs. AF2°			-26.78	-48,72 to -4,847	Yes	**
	AF2° +LNAME+INDO vs. WT			-7.179	-25,09 to 10,73	No	ns		AF2° +LNAME+INDO vs. WT			-28.06	-45,97 to -10,15	Yes	****
	AF2° +LNAME+INDO vs. AF2°			-5.729	-23,64 to 12,18	No	ns		AF2° +LNAME+INDO vs. AF2°			-26.42	-44,33 to -8,513	Yes	***
	WT vs. AF2			1.45	-16,46 to 19,36	No	ns		WT vs. AF2			1.641	-16,27 to 19,55	No	ns
	Row 3								Row 6
	WT +LNNA vs. WT+ LNNA+LNAME			-7.569	-35,57 to 20,43	No	ns		WT +LNNA vs. WT+ LNNA+LNAME			-6.381	-34,38 to 21,62	No	ns
	WT +LNNA vs. WT +LNNA+INDO			-6.788	-28,31 to 14,74	No	ns		WT +LNNA vs. WT +LNNA+INDO			-0.1622	-21,69 to 21,36	No	ns
	WT +LNNA vs. AF2° +LNAME+INDO			-2.249	-19,65 to 15,16	No	ns		WT +LNNA vs. AF2° +LNAME+INDO			1.362	-16,04 to 18,77	No	ns
	WT +LNNA vs. WT + LNNA+LNAME			-12.55	-29,96 to 4,852	No	ns		WT +LNNA vs. WT + LNNA+LNAME			-36.37	-53,77 to -18,96	Yes	****
	WT +LNNA vs. AF2°			-11.72	-29,13 to 5,680	No	ns		WT +LNNA vs. AF2°			-35.94	-53,35 to -18,54	Yes	****
	WT + LNNA+LNAME vs. WT +LNNA+INDO			0.7811	-30,24 to 31,80	No	ns		WT + LNNA+LNAME vs. WT +LNNA+INDO			6.218	-24,80 to 37,24	No	ns
	WT + LNNA+LNAME vs. AF2° +LNAME+INDO			5.32	-23,00 to 33,64	No	ns		WT + LNNA+LNAME vs. AF2° +LNAME+INDO			7.743	-20,57 to 36,06	No	ns
	WT + LNNA+LNAME vs. WT +LNNA+INDO			-4.984	-33,30 to 23,33	No	ns		WT + LNNA+LNAME vs. WT +LNNA+INDO			-29.99	-58,31 to -1,672	Yes	*
	WT + LNNA+LNAME vs. AF2°			-4.156	-32,47 to 24,16	No	ns		WT + LNNA+LNAME vs. AF2°			-29.56	-57,88 to -1,246	Yes	*
	WT +LNNA+INDO vs. AF2° +LNAME+INDO			4.539	-17,39 to 26,47	No	ns		WT +LNNA+INDO vs. AF2° +LNAME+INDO			1.525	-20,41 to 23,46	No	ns
	WT +LNNA+INDO vs. WT			-5.765	-27,70 to 16,17	No	ns		WT +LNNA+INDO vs. WT			-36.21	-58,14 to -14,27	Yes	****
	WT +LNNA+INDO vs. AF2°			-4.937	-26,87 to 17,00	No	ns		WT +LNNA+INDO vs. AF2°			-35.78	-57,72 to -13,85	Yes	****
	AF2° +LNAME+INDO vs. WT			-10.3	-28,21 to 7,605	No	ns		AF2° +LNAME+INDO vs. WT			-37.73	-55,64 to -19,82	Yes	****
	AF2° +LNAME+INDO vs. AF2°			-9.476	-27,39 to 8,433	No	ns		AF2° +LNAME+INDO vs. AF2°			-37.31	-55,22 to -19,40	Yes	****
	WT vs. AF2			0.8285	-17,08 to 18,74	No	ns		WT vs. AF2			0.4257	-17,48 to 18,33	No	ns
	Figure 4 panel E-H (WT group)
	Acetylcholine (LogM)	% relaxation	WT											Acetylcholine (LogM)	% relaxation	WT	with L-NNA								Acetylcholine (LogM)	% relaxation	WT	with L-NNA + indo
	-9	11.4728	25.6673	6.51024	1.66135	-0.544588	6.89739	3.16386	0	1.09434	3.74033			-9	0.892857	5.21008	7.27763	6.02808	2.08136	10.4457	10.8893	4.31034	-2.12404		-9	0.892857	2.03562	2.52005	1.2275	13.2701	-4.23042	10.2667
	-8.5	5.58824	54.081	11.5129	10.7988	7.58679	6.49357	11.243	0	6.41509	9.33406			-8.5	10.7143	14.4538	9.02965	5.86292	7.56859	17.2702	24.2287	7.32759	-2.37893		-8.5	10.7143	1.65394	11.3402	9.44354	15.6398	-4.59046	19.4667
	-8	9.19696	66.1073	17.1667	19.2258	13.0753	6.92548	19.1003	0	31.1321	13.2693			-8	16.9643	15.2941	21.8329	8.34022	8.70388	25.6267	26.8603	15.0862	-0.849618		-8	16.9643	8.52417	17.1821	10.5565	18.9574	-3.78038	25.6
	-7.5	1.616	79.341	28.1049	20.6185	30.2871	17.3772	27.2714	14.1026	46.2264	23.5509			-7.5	20.5357	25.7143	23.0458	13.2948	9.55535	28.273	28.6751	17.2414	1.69924		-7.5	20.5357	6.99746	20.0458	8.01964	23.6967	-0.990099	29.6
	-7	7.84754	89.2634	37.5677	29.0477	78.2429	71.7708	55.826	92.3077	67.9245	73.0226			-7	29.4643	30.4202	26.8194	12.0562	12.6774	28.5515	30.127	18.1034	3.14358		-7	29.4643	7.12468	20.6186	9.98363	36.019	-0.540054	27.7333
	-6.5	31.7691	94.9062	63.8309	51.4695	89.8891	98.4638	89.0664	95.641	91.5094	99.6234			-6.5	32.7381	54.6219	27.7628	11.3955	11.3529	30.5014	29.9456	21.5517	6.45709		-6.5	32.7381	10.9288	20.7331	10.1473	30.3317	0.360036	26.4
	-6	75.4505	96.0249	78.7672	79.9813	96.9021	100	94.8898	96.1539	100	100			-6	41.0714	71.7647	26.4151	20.3964	29.2337	28.4123	39.7459	23.7069	10.7901		-6	41.0714	12.2137	24.5132	12.6841	21.801	5.76058	28.2667
	-5.5	78.5129	97.2684	85.2631	90.7407	97.5518	99.9118	97.1455	96.1539	100	100			-5.5	40.1786	80.5042	27.628	30.801	46.4522	34.5404	64.5191	34.4828	10.7052		-5.5	40.1786	11.4504	21.9931	10.802	23.2228	8.10081	53.3333
	-5	81.6821	97.3333	89.1846	84.7222	98.1533	100	98.0942	96.1539	100	100			-5	27.0833	83.3613	29.9191	35.8381	63.9546	34.5404	72.323	33.6207	10.6202		-5	27.0833	7.76081	26.3459	12.6023	24.6445	8.55086	53.3333
	Bonferroni's multiple comparisons test		Mean Diff,	95% CI of diff,	Significant?	Summary		Bonferroni's multiple comparisons test		Mean Diff,	95% CI of diff,	Significant?	Summary		Bonferroni's multiple comparisons test		Mean Diff,	95% CI of diff,	Significant?	Summary
	Row 1							Row 4							Row 7
	WT vs. WT + LNNA		0.9651	-15,70 to 17,63	No	ns		WT vs. WT + LNNA		10.18	-6,487 to 26,85	No	ns		WT vs. WT + LNNA		59.42	42,76 to 76,09	Yes	****
	WT vs. WT +LNNA+indo		1.785	-16,95 to 20,52	No	ns		WT vs. WT +LNNA+indo		14.29	-4,443 to 33,02	No	ns		WT vs. WT +LNNA+indo		74.28	55,55 to 93,01	Yes	****
	WT + LNNA vs. WT +LNNA+indo		0.8197	-18,30 to 19,94	No	ns		WT + LNNA vs. WT +LNNA+indo		4.109	-15,01 to 23,23	No	ns		WT + LNNA vs. WT +LNNA+indo		14.85	-4,264 to 33,97	No	ns
	Row 2							Row 5							Row 8
	WT vs. WT + LNNA		1.852	-14,81 to 18,52	No	ns		WT vs. WT + LNNA		39.02	22,35 to 55,69	Yes	****		WT vs. WT + LNNA		53.16	36,50 to 69,83	Yes	****
	WT vs. WT +LNNA+indo		3.48	-15,25 to 22,21	No	ns		WT vs. WT +LNNA+indo		43.46	24,73 to 62,19	Yes	****		WT vs. WT +LNNA+indo		72.77	54,04 to 91,50	Yes	****
	WT + LNNA vs. WT +LNNA+indo		1.627	-17,49 to 20,74	No	ns		WT + LNNA vs. WT +LNNA+indo		4.439	-14,68 to 23,56	No	ns		WT + LNNA vs. WT +LNNA+indo		19.61	0,4890 to 38,72	Yes	*
	Row 3							Row 6							Row 9
	WT vs. WT + LNNA		4.202	-12,46 to 20,87	No	ns		WT vs. WT + LNNA		55.47	38,80 to 72,14	Yes	****		WT vs. WT + LNNA		51.06	34,39 to 67,73	Yes	****
	WT vs. WT +LNNA+indo		6.68	-12,05 to 25,41	No	ns		WT vs. WT +LNNA+indo		64.13	45,40 to 82,86	Yes	****		WT vs. WT +LNNA+indo		72.33	53,59 to 91,06	Yes	****
	WT + LNNA vs. WT +LNNA+indo		2.478	-16,64 to 21,60	No	ns		WT + LNNA vs. WT +LNNA+indo		8.664	-10,45 to 27,78	No	ns		WT + LNNA vs. WT +LNNA+indo		21.27	2,150 to 40,38	Yes	*
	Figure 4 panel E (ERα-/- mice)
	Acetylcholine (LogM)	% relaxation	ERα-/-											Acetylcholine (LogM)	% relaxation	ERα-/-	with L-NNA					Acetylcholine (LogM)	% relaxation	ERα-/-	with L-NNA + indo
	-9	10.7753	10.0282	4.66832	7.56232	1.60014	3.17228	14.5088	4.06805	0.918635	3.67181			-9	3.06749	7.62987	4.77223	2.07972	-1.0559	10.4622		-9	8.62801	1.35135	3.46975	7.13686	7.62463	0.882825	10.5684	10.6697	2.59948	2.30564
	-8.5	14.2897	21.939	11.0693	10.6103	10.5183	15.6155	26.3498	8.49604	9.71129	5.09532			-8.5	5.62372	10.0649	14.4252	2.68631	6.27329	17.3779		-8.5	15.4173	-4.59459	10.3203	13.8539	9.48192	1.04334	15.5834	17.5936	7.18379	3.71005
	-8	18.3991	26.541	16.4986	15.787	15.9788	17.7342	35.9676	8.42816	23.7533	5.24606			-8	6.85072	10.3896	13.3406	6.06586	15.4658	18.7794		-8	17.8218	-5.13514	11.7438	20.5709	12.0235	8.34671	17.8759	23.6095	10.562	5.33718
	-7.5	40.0148	35.6953	12.2973	23.3228	26.5856	58.1394	46.4083	15.9982	37.664	5.23546			-7.5	7.05521	7.95455	18.4382	9.70537	20.4969	23.7035		-7.5	20.5092	-4.86486	14.5907	22.2502	13.001	9.14928	19.9654	23.3825	12.7172	5.55644
	-7	94.0152	65.2267	38.8305	59.1326	82.1495	96.9246	67.1728	41.048	56.8242	8.66			-7	7.77096	12.1753	15.4013	11.6118	20.1863	23.5698		-7	20.7921	-10.1351	14.1459	26.6163	16.2268	20.947	21.0549	22.588	22.7866	4.76795
	-6.5	98.7204	90.1466	92.7088	96.2803	93.0452	99.0434	79.5062	90.5247	87.664	27.1588			-6.5	6.33947	23.4091	6	19.2374	17.8261	27.7276		-6.5	46.959	-7.56757	13.879	38.0353	25.9042	19.984	23.3467	22.0204	25.5166	2.86036
	-6	99.5702	95.0518	97.7001	97.9934	95.3434	99.4284	91.8824	99.0934	93.7008	95.1389			-6	0.817996	32.4026	9	24.7314	24.5963	38.2784		-6	88.9675	4.45946	44.5729	90.932	90.7136	23.9968	24.2294	22.815	27.8469	13.1309
	-5.5	98.9286	95.844	98.3623	98.0791	96.0142	99.7715	97.929	100.599	95.5381	96.8042			-5.5	-1.32924	31.3312	8	31.6118	36.5217	42.0172		-5.5	93.6351	56.2162	62.2776	93.8707	92.0821	48.3949	26.4852	23.1555	30.9932	26.4574
	-5	100	97.1557	98.8827	98.0378	96.6011	99.8247	98.2215	100.617	94.7507	96.5705			-5	-10.5317	32.6299	11	37.0017	27.5776	48.0545		-5	93.4936	83.5135	48.5765	94.9622	94.3304	37.3997	29.7637	24.5176	12.1062	26.8667
	Bonferroni's multiple comparisons test		Mean Diff,	95% CI of diff,	Significant?	Summary		Bonferroni's multiple comparisons test		Mean Diff,	95% CI of diff,	Significant?	Summary		Bonferroni's multiple comparisons test		Mean Diff,	95% CI of diff,	Significant?	Summary
	Row 1							Row 4							Row 7
	ERα-/- (10) vs. ERα-/- +LNNA		1.605	-18,45 to 21,66	No	ns		ERα-/- (10) vs. ERα-/- +LNNA		15.58	-4,477 to 35,63	No	ns		ERα-/- (10) vs. ERα-/- +LNNA		74.85	54,80 to 94,91	Yes	****
	ERα-/- (10) vs. ERα-/- +LNNA+indo		0.5737	-16,79 to 17,94	No	ns		ERα-/- (10) vs. ERα-/- +LNNA+indo		16.51	-0,8570 to 33,88	No	ns		ERα-/- (10) vs. ERα-/- +LNNA+indo		53.32	35,96 to 70,69	Yes	****
	ERα-/- +LNNA vs. ERα-/- +LNNA+indo		-1.031	-21,09 to 19,02	No	ns		ERα-/- +LNNA vs. ERα-/- +LNNA+indo		0.9332	-19,12 to 20,99	No	ns		ERα-/- +LNNA vs. ERα-/- +LNNA+indo		-21.53	-41,58 to -1,474	Yes	*
	Row 2							Row 5							Row 8
	ERα-/- (10) vs. ERα-/- +LNNA		3.961	-16,09 to 24,02	No	ns		ERα-/- (10) vs. ERα-/- +LNNA		45.88	25,82 to 65,93	Yes	****		ERα-/- (10) vs. ERα-/- +LNNA		73.09	53,04 to 93,15	Yes	****
	ERα-/- (10) vs. ERα-/- +LNNA+indo		4.41	-12,96 to 21,78	No	ns		ERα-/- (10) vs. ERα-/- +LNNA+indo		45.02	27,65 to 62,39	Yes	****		ERα-/- (10) vs. ERα-/- +LNNA+indo		42.43	25,06 to 59,80	Yes	****
	ERα-/- +LNNA vs. ERα-/- +LNNA+indo		0.4493	-19,60 to 20,50	No	ns		ERα-/- +LNNA vs. ERα-/- +LNNA+indo		-0.8598	-20,91 to 19,19	No	ns		ERα-/- +LNNA vs. ERα-/- +LNNA+indo		-30.66	-50,72 to -10,61	Yes	***
	Row 3							Row 6							Row 9
	ERα-/- (10) vs. ERα-/- +LNNA		6.618	-13,44 to 26,67	No	ns		ERα-/- (10) vs. ERα-/- +LNNA		68.72	48,67 to 88,78	Yes	****		ERα-/- (10) vs. ERα-/- +LNNA		73.78	53,72 to 93,83	Yes	****
	ERα-/- (10) vs. ERα-/- +LNNA+indo		6.158	-11,21 to 23,53	No	ns		ERα-/- (10) vs. ERα-/- +LNNA+indo		64.39	47,02 to 81,75	Yes	****		ERα-/- (10) vs. ERα-/- +LNNA+indo		43.51	26,15 to 60,88	Yes	****
	ERα-/- +LNNA vs. ERα-/- +LNNA+indo		-0.4603	-20,51 to 19,59	No	ns		ERα-/- +LNNA vs. ERα-/- +LNNA+indo		-4.337	-24,39 to 15,72	No	ns		ERα-/- +LNNA vs. ERα-/- +LNNA+indo		-30.26	-50,32 to -10,21	Yes	**
	Figure 4 panel F (C451-ERα mice)
	Acetylcholine (LogM)	% relaxation	C451A-ERα					Acetylcholine (LogM)	% relaxation	C451A-ERα	with L-NNA				Acetylcholine (LogM)	% relaxation	C451A-ERα	with L-NNA + indo
	-9	-1.40053	3.23661	3.33268	0.905721	1.9313		-9	5.80153	-3.6862	5.07167	-5.58539	8.18966		-9	7.30223	-1.08827	7.0922	-6.25551	-0.277778
	-8.5	7.58791	3.50855	7.9541	5.50024	10.2737		-8.5	15.4199	-0.756144	9.92282	-4.7261	10.3448		-8.5	12.2718	-1.33011	5.05319	-4.93392	2.08333
	-8	14.1094	9.94811	15.0088	17.1432	19.7213		-8	28.0916	-2.17391	12.2381	-2.90011	10.6322		-8	14.6045	2.66022	12.8546	-4.49339	2.36111
	-7.5	23.2884	15.8508	19.2317	26.4953	24.8732		-7.5	33.2824	-1.60681	13.2304	-2.04082	18.6782		-7.5	14.3002	3.26481	9.84042	-2.64317	1.80556
	-7	48.5286	33.5643	35.6183	40.6212	60.2572		-7	40.3053	2.36295	13.1202	2.90011	19.5402		-7	13.3874	2.17654	10.2837	-2.46696	8.61111
	-6.5	87.86	87.7281	68.5631	82.2371	84.9746		-6.5	43.2061	6.3327	14.8842	10.6337	20.1149		-6.5	13.3874	3.86941	9.75177	-0.0881057	9.44444
	-6	95.8711	97.5381	92.9944	94.5766	97.0183		-6	49.1603	16.8242	17.6406	5.58539	23.1322		-6	19.1684	4.35308	8.59929	2.64317	16.3889
	-5.5	99.3024	99.2918	94.9681	96.3478	98.7385		-5.5	52.2137	31.38	24.366	7.5188	25.2874		-5.5	26.43	7.13422	9.75177	13.8326	14.3056
	-5	99.6868	99.4964	96.2827	96.8815	100		-5	51.6031	32.949	29.989	7.5188	23.2759		-5	25.5578	8.34341	10.461	20.1762	13
	Bonferroni's multiple comparisons test		Mean Diff,	95% CI of diff,	Significant?	Summary		Bonferroni's multiple comparisons test		Mean Diff,	95% CI of diff,	Significant?	Summary		Bonferroni's multiple comparisons test		Mean Diff,	95% CI of diff,	Significant?	Summary
	Row 1							Row 4							Row 7
	WT vs. WT + LNNA		0.9651	-15,70 to 17,63	No	ns		WT vs. WT + LNNA		10.18	-6,487 to 26,85	No	ns		WT vs. WT + LNNA		59.42	42,76 to 76,09	Yes	****
	WT vs. WT +LNNA+indo		1.785	-16,95 to 20,52	No	ns		WT vs. WT +LNNA+indo		14.29	-4,443 to 33,02	No	ns		WT vs. WT +LNNA+indo		74.28	55,55 to 93,01	Yes	****
	WT + LNNA vs. WT +LNNA+indo		0.8197	-18,30 to 19,94	No	ns		WT + LNNA vs. WT +LNNA+indo		4.109	-15,01 to 23,23	No	ns		WT + LNNA vs. WT +LNNA+indo		14.85	-4,264 to 33,97	No	ns
	Row 2							Row 5							Row 8
	WT vs. WT + LNNA		1.852	-14,81 to 18,52	No	ns		WT vs. WT + LNNA		39.02	22,35 to 55,69	Yes	****		WT vs. WT + LNNA		53.16	36,50 to 69,83	Yes	****
	WT vs. WT +LNNA+indo		3.48	-15,25 to 22,21	No	ns		WT vs. WT +LNNA+indo		43.46	24,73 to 62,19	Yes	****		WT vs. WT +LNNA+indo		72.77	54,04 to 91,50	Yes	****
	WT + LNNA vs. WT +LNNA+indo		1.627	-17,49 to 20,74	No	ns		WT + LNNA vs. WT +LNNA+indo		4.439	-14,68 to 23,56	No	ns		WT + LNNA vs. WT +LNNA+indo		19.61	0,4890 to 38,72	Yes	*
	Row 3							Row 6							Row 9
	WT vs. WT + LNNA		4.202	-12,46 to 20,87	No	ns		WT vs. WT + LNNA		55.47	38,80 to 72,14	Yes	****		WT vs. WT + LNNA		51.06	34,39 to 67,73	Yes	****
	WT vs. WT +LNNA+indo		6.68	-12,05 to 25,41	No	ns		WT vs. WT +LNNA+indo		64.13	45,40 to 82,86	Yes	****		WT vs. WT +LNNA+indo		72.33	53,59 to 91,06	Yes	****
	WT + LNNA vs. WT +LNNA+indo		2.478	-16,64 to 21,60	No	ns		WT + LNNA vs. WT +LNNA+indo		8.664	-10,45 to 27,78	No	ns		WT + LNNA vs. WT +LNNA+indo		21.27	2,150 to 40,38	Yes	*
	Figure 4 panel G (R264A-ERα mice)
	Acetylcholine (LogM)	% relaxation	R264A-ERα							Acetylcholine (LogM)	% relaxation	R264A-ERα	with L-NNA						Acetylcholine (LogM)	% relaxation	R264A-ERα	with L-NNA + indo
	-9	5.31759	12.2595	2.6607	2.25572	0.343283	4.21794	5.99174		-9	7.37327	6.10998	2.43902	-2.43363	5.94286	-1.08578	24.586		-9	1.52403	-2.38095	13.4426	1.78571	-6.58228	-0.566974	-5
	-8.5	9.26505	17.2874	2.35319	8.01922	3.29548	6.16865	5.99174		-8.5	12.4424	17.9226	2.00861	3.4292	12	5.04886	46.879		-8.5	4.10316	-0.529101	20.4918	2.85714	-11.8987	1.34656	-4.28571
	-8	17.3341	23.0207	2.86601	10.3459	6.71428	13.2435	9.71074		-8	26.2673	26.2729	11.0473	2.87611	15.3143	6.89468	54.7771		-8	13.9508	-0.925926	33.2787	10.5714	-6.32911	4.46492	1.60714
	-7.5	22.779	45.236	8.25432	17.3539	16.9681	14.0549	15.0826		-7.5	23.0415	34.8269	13.9168	5.97345	18.5143	6.89468	56.051		-7.5	17.1161	1.71958	31.9672	8.57143	7.59494	6.87456	3.21429
	-7	27.349	59.8829	13.3769	31.4759	75.0124	25.9879	19.4215		-7	27.6498	42.1589	16.9297	-1.88053	19.8857	3.04017	57.8344		-7	17.4678	0.661376	20.3279	11.4286	35.1899	6.44933	6.78571
	-6.5	33.8248	76.5467	30.9576	83.5111	94.9895	75.6131	39.4628		-6.5	32.2581	63.1365	16.7862	19.9115	21.4857	12.0521	61.0191		-6.5	22.3916	3.43915	10.6557	25	61.519	8.29199	12.1429
	-6	43.6903	97.7951	54.3363	94.1509	97.5838	94.4188	72.314		-6	36.4055	82.8921	17.934	57.3009	35.6571	23.7242	62.6752		-6	22.2743	5.95238	7.70492	39.5714	86.076	10.4181	28.0357
	-5.5	52.3085	99.2714	69.4133	96.6849	99.2888	97.7331	92.1488		-5.5	37.3272	91.446	19.2252	79.3142	55.5429	35.5592	72.2293		-5.5	21.4537	4.36508	7.37705	47.7143	91.3924	13.8909	22.1429
	-5	59.9002	98.8653	80.3552	97.2309	99.4666	97.5756	95.6612		-5	32.7189	93.89	16.7862	81.6372	62.0571	48.6971	72.2293		-5	16.6471	7.80423	8.68852	54.2857	92.9114	18.9228	22.1429
	Bonferroni's multiple comparisons test		Mean Diff,	95% CI of diff,	Significant?	Summary		Bonferroni's multiple comparisons test		Mean Diff,	95% CI of diff,	Significant?	Summary		Bonferroni's multiple comparisons test		Mean Diff,	95% CI of diff,	Significant?	Summary
	Row 1							Row 4							Row 7
	R264A-ERα vs. R264A-ERα +LNNA		-1.412	-26,27 to 23,45	No	ns		R264A-ERα vs. R264A-ERα +LNNA		-2.784	-27,64 to 22,07	No	ns		R264A-ERα vs. R264A-ERα +LNNA		33.96	9,099 to 58,82	Yes	**
	R264A-ERα vs. R264A-ERα +LNNA+indo		4.403	-20,45 to 29,26	No	ns		R264A-ERα vs. R264A-ERα +LNNA+indo		8.953	-15,90 to 33,81	No	ns		R264A-ERα vs. R264A-ERα +LNNA+indo		50.61	25,75 to 75,47	Yes	****
	R264A-ERα +LNNA vs. R264A-ERα +LNNA+indo		5.816	-19,04 to 30,67	No	ns		R264A-ERα +LNNA vs. R264A-ERα +LNNA+indo		11.74	-13,12 to 36,60	No	ns		R264A-ERα +LNNA vs. R264A-ERα +LNNA+indo		16.65	-8,207 to 41,51	No	ns
	Row 2							Row 5							Row 8
	R264A-ERα vs. R264A-ERα +LNNA		-6.764	-31,62 to 18,09	No	ns		R264A-ERα vs. R264A-ERα +LNNA		12.41	-12,45 to 37,27	No	ns		R264A-ERα vs. R264A-ERα +LNNA		30.89	6,028 to 55,74	Yes	**
	R264A-ERα vs. R264A-ERα +LNNA+indo		5.757	-19,10 to 30,61	No	ns		R264A-ERα vs. R264A-ERα +LNNA+indo		22.03	-2,830 to 46,89	No	ns		R264A-ERα vs. R264A-ERα +LNNA+indo		56.93	32,07 to 81,79	Yes	****
	R264A-ERα +LNNA vs. R264A-ERα +LNNA+indo		12.52	-12,34 to 37,38	No	ns		R264A-ERα +LNNA vs. R264A-ERα +LNNA+indo		9.615	-15,24 to 34,47	No	ns		R264A-ERα +LNNA vs. R264A-ERα +LNNA+indo		26.04	1,186 to 50,90	Yes	*
	Row 3							Row 6							Row 9
	R264A-ERα vs. R264A-ERα +LNNA		-8.602	-33,46 to 16,26	No	ns		R264A-ERα vs. R264A-ERα +LNNA		29.75	4,893 to 54,61	Yes	*		R264A-ERα vs. R264A-ERα +LNNA		31.58	6,719 to 56,43	Yes	**
	R264A-ERα vs. R264A-ERα +LNNA+indo		3.802	-21,06 to 28,66	No	ns		R264A-ERα vs. R264A-ERα +LNNA+indo		41.64	16,78 to 66,50	Yes	***		R264A-ERα vs. R264A-ERα +LNNA+indo		58.24	33,38 to 83,09	Yes	****
	R264A-ERα +LNNA vs. R264A-ERα +LNNA+indo		12.4	-12,45 to 37,26	No	ns		R264A-ERα +LNNA vs. R264A-ERα +LNNA+indo		11.89	-12,97 to 36,74	No	ns		R264A-ERα +LNNA vs. R264A-ERα +LNNA+indo		26.66	1,801 to 51,52	Yes	*
	Figure 5 panel H (AF2°-ERα mice)
	Acetylcholine (LogM)	% relaxation	AF2°-ERα						Acetylcholine (LogM)	% relaxation	AF2°-ERα	with L-NNA			Acetylcholine (LogM)	% relaxation	AF2°-ERα	with L-NNA + indo
	-9	6.32768	3.99501	2.44371	1.83133	-1.58483	0		-9	4.15094	1.41767	3.53635	8.88889		-9	23.7363	2.28188	0.96463	2.47026	5.00821
	-8.5	8.0226	6.61673	9.69254	6.56691	0.0254966	2.50868		-8.5	9.0566	7.19738	7.76031	13.1481		-8.5	25.0549	6.44295	3.53698	10.064	8.04598
	-8	15.8192	8.73908	21.4683	10.0523	2.97764	12.6138		-8	10.6604	10.578	9.72495	16.3889		-8	27.4725	9.26174	7.71704	12.4428	17.4056
	-7.5	25.3107	11.1111	50.6339	12.9224	25.2633	18.3733		-7.5	10.9434	15.4853	12.6719	16.6667		-7.5	49.4505	15.302	11.5756	9.42361	15.8456
	-7	37.5141	16.8539	72.9531	40.7224	90.8392	35.688		-7	14.2453	20.2835	13.7525	18.5185		-7	36.2637	21.3423	17.8992	18.7557	19.0476
	-6.5	95.1412	32.7091	94.6994	96.3849	97.0207	68.0514		-6.5	16.4151	26.8266	15.8153	23.1482		-6.5	25.2747	26.4429	50.6967	25.8006	26.4368
	-6	94.2373	61.4232	96.6487	98.3887	99.434	93.5596		-6	23.9623	30.0982	17.5835	28.7037		-6	27.4725	32.4832	89.3891	89.936	39.5731
	-5.5	97.4011	82.7715	97.0946	98.9961	98.9776	96.3248		-5.5	30.1887	34.3511	17.2888	35.1852		-5.5	24.3956	38.9262	93.0332	93.9616	59.9343
	-5	98.5311	92.5094	97.9612	99.6036	99.0304	97.1562		-5	38.8679	37.0774	20.7269	44.4444		-5	84.6154	43.6242	92.4973	92.3147	69.6223
	Bonferroni's multiple comparisons test		Mean Diff,	95% CI of diff,	Significant?	Summary		Bonferroni's multiple comparisons test		Mean Diff,	95% CI of diff,	Significant?	Summary		Bonferroni's multiple comparisons test		Mean Diff,	95% CI of diff,	Significant?	Summary
	Row 1							Row 4							Row 7
	AF2° (6) vs. AF2° +LNNA		-2.33	-25,14 to 20,48	No	ns		AF2° (6) vs. AF2° +LNNA		9.994	-12,82 to 32,81	No	ns		AF2° (6) vs. AF2° +LNNA		65.53	42,71 to 88,34	Yes	****
	AF2° (6) vs. AF2° +LNNA+indo		-4.723	-26,12 to 16,68	No	ns		AF2° (6) vs. AF2° +LNNA+indo		3.616	-17,78 to 25,02	No	ns		AF2° (6) vs. AF2° +LNNA+indo		34.84	13,44 to 56,25	Yes	***
	AF2° +LNNA vs. AF2° +LNNA+indo		-2.394	-26,10 to 21,31	No	ns		AF2° +LNNA vs. AF2° +LNNA+indo		-6.378	-30,09 to 17,33	No	ns		AF2° +LNNA vs. AF2° +LNNA+indo		-30.68	-54,39 to -6,975	Yes	**
	Row 2							Row 5							Row 8
	AF2° (6) vs. AF2° +LNNA		-3.718	-26,53 to 19,10	No	ns		AF2° (6) vs. AF2° +LNNA		32.4	9,581 to 55,21	Yes	**		AF2° (6) vs. AF2° +LNNA		66.01	43,19 to 88,82	Yes	****
	AF2° (6) vs. AF2° +LNNA+indo		-5.057	-26,46 to 16,34	No	ns		AF2° (6) vs. AF2° +LNNA+indo		26.43	5,032 to 47,83	Yes	**		AF2° (6) vs. AF2° +LNNA+indo		33.21	11,81 to 54,61	Yes	***
	AF2° +LNNA vs. AF2° +LNNA+indo		-1.338	-25,05 to 22,37	No	ns		AF2° +LNNA vs. AF2° +LNNA+indo		-5.962	-29,67 to 17,75	No	ns		AF2° +LNNA vs. AF2° +LNNA+indo		-32.8	-56,51 to -9,088	Yes	**
	Row 3							Row 6							Row 9
	AF2° (6) vs. AF2° +LNNA		0.107	-22,71 to 22,92	No	ns		AF2° (6) vs. AF2° +LNNA		60.12	37,30 to 82,93	Yes	****		AF2° (6) vs. AF2° +LNNA		62.19	39,37 to 85,00	Yes	****
	AF2° (6) vs. AF2° +LNNA+indo		-2.915	-24,32 to 18,49	No	ns		AF2° (6) vs. AF2° +LNNA+indo		49.74	28,34 to 71,14	Yes	****		AF2° (6) vs. AF2° +LNNA+indo		20.93	-0,4707 to 42,33	No	ns
	AF2° +LNNA vs. AF2° +LNNA+indo		-3.022	-26,73 to 20,69	No	ns		AF2° +LNNA vs. AF2° +LNNA+indo		-10.38	-34,09 to 13,33	No	ns		AF2° +LNNA vs. AF2° +LNNA+indo		-41.26	-64,96 to -17,55	Yes	***
