# Supplementary material for: Membrane estrogen receptor alpha (ERα) participates in flow-mediated dilation in a ligand-independent manner
Source: eLife journal article supplement (doi:10.7554/elife.68695), 2021-11-29
Supplement: supp [file elife-68695-supp-v1.zip › elife_poa_e68695_Figure_4_source_data_2.xlsx]

## Sheet: Feuil1
	Data and statistical analysis from experiments plotted in Figure 4 Supplement Figure 1 A to G
	Figure 4 supplement Figure 1, panel A-B
	FLOW	% dilation	Esr1+/+											FLOW	% dilation	Esr1-/-
	3	0	0	0	0	0	0	0	0	0	0	0		3	0	0	0	0	0	0	0	0
	6	16.026	9.211	4.706	0	-7.843	14.286	26.506	24.176	16.216	9.677	7.759		6	10.811	1.961	7.955	9.901	9.901	1.681	8.547	11.4035
	9	46.795	17.105	12.941	20.313	11.765	31.746	9.639	32.967	37.838	17.204	12.931		9	31.081	9.804	10.227	34.653	34.653	4.202	17.094	21.0526
	15	48.077	32.895	41.176	37.5	27.451	57.143	19.277	26.374	55.405	22.581	17.241		15	40.541	21.569	18.182	33.333	26.733	15.966	30.769	27.193
	21	55.769	46.053	51.765	56.25	41.176	65.079	33.735	49.451	94.595	50.538	27.586		21	60.811	41.176	30.682	25.203	42.574	23.529	37.607	38.5965
	30	61.538	53.947	56.471	59.375	56.863	71.429	42.169	58.242	98.649	66.667	36.207		30	78.378	44.118	34.091	35.772	28.713	23.529	44.444	46.4912
	50	65.385	31.579	61.176	54.688	78.431	68.254	42.169	53.846	94.595	54.839	33.621		50	87.838	37.255	37.5	34.146	24.752	26.891	41.88	48.2456
	FLOW	% dilation	Esr1+/+ + L-NNA											FLOW	% dilation	Esr1-/- + L-NNA
	3	0	0	0	0	0	0	0						3	0	0	0	0	0	0	0	0	0
	6	9.836	5.926	4.63	2.874	1.878	3.2967	0.581						6	6.294	3.846	5.797	14.189	3.906	10	1.058	2.20994	9.27835
	9	19.672	8.889	10.185	4.023	2.817	3.2967	3.488						9	11.189	11.538	7.246	22.297	8.594	8.889	1.587	3.31492	0
	15	22.951	12.593	18.519	6.322	6.573	3.2967	2.326						15	16.783	32.692	11.594	29.73	14.063	22.222	5.82	4.41989	1.03093
	21	27.869	31.852	24.074	23.563	15.962	8.24176	8.14						21	30.769	42.308	20.29	43.243	39.063	40	8.466	6.07735	12.3711
	30	26.23	42.222	25.926	37.356	23.005	18.6813	9.302						30	48.252	48.077	28.986	54.054	53.906	56.667	23.28	9.94475	19.5876
	50	26.23	48.889	25	37.931	23.474	13.7363	8.721						50	41.958	42.308	25.362	49.324	49.219	51.111	26.984	11.6022	10.309
	FLOW	% dilation	Esr1+/+ + L-NNA + indo											FLOW	% dilation	Esr1-/- + L-NNA + indo
	3	0	0	0	0	0								3	0	0	0	0	0
	6	9.565	7.767	0.613	2.5	9.62963								6	5.66	13.333	15.385	2.885	-2.04082
	9	11.304	14.563	0.613	4.375	16.2963								9	11.95	13.333	20.979	10.577	1.36054
	15	20	23.301	6.135	9.375	24.4444								15	16.981	24.444	20.979	16.346	12.2449
	21	18.261	36.893	6.748	10.625	25.1852								21	30.818	46.667	25.874	35.096	17.6871
	30	18.261	54.369	15.951	11.875	31.8518								30	36.478	46.667	32.867	39.904	22.449
	50	13.913	33.01	14.11	6.875	40								50	35.849	43.333	34.965	36.058	23.1292
	FLOW	% dilation	Esr1+/+ + L-NNA + indo + MSPPOH											FLOW	% dilation	Esr1-/- + L-NNA + indo + MSPPOH
	3	0	0	0	0									3	0	0	0	0	0
	6	4.202	3.96825	16.456	1.00503									6	1.653	16.102	2.344	8.38	1.47059
	9	8.403	5.55556	18.354	7.53769									9	6.612	0	11.719	18.436	1.47059
	15	8.403	15.873	22.785	13.5678									15	9.091	11.017	11.719	41.844	3.67647
	21	16.807	23.0159	29.114	15.0754									21	22.314	13.559	17.969	50.223	10.2941
	30	29.412	23.0159	33.544	19.598									30	28.099	19.492	25.781	52.458	15.4412
	50	15.966	23.0159	33.544	9.54774									50	27.273	7.627	25	47.43	15.4412
	ANOVA repeated mesurements
	Bonferroni's multiple comparisons test			Mean Diff,	95% CI of diff,	Significant?	Summary		Bonferroni's multiple comparisons test			Mean Diff,	95% CI of diff,	Significant?	Summary		Bonferroni's multiple comparisons test			Mean Diff,	95% CI of diff,	Significant?	Summary
	Row 1								Row 4								Row 7
	WT Bl6N +LNNA (6) vs. WT Bl6N +LNNA+INDO (4)			0	-22,96 to 22,96	No	ns		WT Bl6N +LNNA (6) vs. WT Bl6N +LNNA+INDO (4)			-0.4602	-23,42 to 22,50	No	ns		WT Bl6N +LNNA (6) vs. WT Bl6N +LNNA+INDO (4)			9.187	-13,77 to 32,14	No	ns
	WT Bl6N +LNNA (6) vs. Esr1-/- CTL (8)			0	-19,21 to 19,21	No	ns		WT Bl6N +LNNA (6) vs. Esr1-/- CTL (8)			-10.29	-29,50 to 8,915	No	ns		WT Bl6N +LNNA (6) vs. Esr1-/- CTL (8)			-14.14	-33,35 to 5,065	No	ns
	WT Bl6N +LNNA (6) vs. Esr1-/- (9) LNNA			0	-18,74 to 18,74	No	ns		WT Bl6N +LNNA (6) vs. Esr1-/- (9) LNNA			1.433	-17,31 to 20,18	No	ns		WT Bl6N +LNNA (6) vs. Esr1-/- (9) LNNA			-4.977	-23,72 to 13,77	No	ns
	WT Bl6N +LNNA (6) vs. Esr1-/- (5) LNNA+INDO			0	-21,54 to 21,54	No	ns		WT Bl6N +LNNA (6) vs. Esr1-/- (5) LNNA+INDO			-1.706	-23,24 to 19,83	No	ns		WT Bl6N +LNNA (6) vs. Esr1-/- (5) LNNA+INDO			-6.496	-28,03 to 15,04	No	ns
	WT Bl6N +LNNA (6) vs. Esr1-/- (5) MSPPOH+LNAME+INDO			0	-21,54 to 21,54	No	ns		WT Bl6N +LNNA (6) vs. Esr1-/- (5) MSPPOH+LNAME+INDO			1.024	-20,51 to 22,56	No	ns		WT Bl6N +LNNA (6) vs. Esr1-/- (5) MSPPOH+LNAME+INDO			3.617	-17,92 to 25,15	No	ns
	WT Bl6N +LNNA (6) vs. Esr1+/+ (4) LNAME+INDO+MSPPOH			0	-22,96 to 22,96	No	ns		WT Bl6N +LNNA (6) vs. Esr1+/+ (4) LNAME+INDO+MSPPOH			1.336	-21,62 to 24,29	No	ns		WT Bl6N +LNNA (6) vs. Esr1+/+ (4) LNAME+INDO+MSPPOH			7.653	-15,30 to 30,61	No	ns
	WT Bl6N +LNNA (6) vs. Esr1 +/+			0	-18,37 to 18,37	No	ns		WT Bl6N +LNNA (6) vs. Esr1 +/+			-20.29	-38,66 to -1,929	Yes	*		WT Bl6N +LNNA (6) vs. Esr1 +/+			-32.32	-50,69 to -13,96	Yes	****
	WT Bl6N +LNNA+INDO (4) vs. Esr1-/- CTL (8)			0	-21,78 to 21,78	No	ns		WT Bl6N +LNNA+INDO (4) vs. Esr1-/- CTL (8)			-9.832	-31,61 to 11,95	No	ns		WT Bl6N +LNNA+INDO (4) vs. Esr1-/- CTL (8)			-23.33	-45,11 to -1,550	Yes	*
	WT Bl6N +LNNA+INDO (4) vs. Esr1-/- (9) LNNA			0	-21,37 to 21,37	No	ns		WT Bl6N +LNNA+INDO (4) vs. Esr1-/- (9) LNNA			1.893	-19,48 to 23,27	No	ns		WT Bl6N +LNNA+INDO (4) vs. Esr1-/- (9) LNNA			-14.16	-35,54 to 7,208	No	ns
	WT Bl6N +LNNA+INDO (4) vs. Esr1-/- (5) LNNA+INDO			0	-23,86 to 23,86	No	ns		WT Bl6N +LNNA+INDO (4) vs. Esr1-/- (5) LNNA+INDO			-1.245	-25,10 to 22,61	No	ns		WT Bl6N +LNNA+INDO (4) vs. Esr1-/- (5) LNNA+INDO			-15.68	-39,54 to 8,176	No	ns
	WT Bl6N +LNNA+INDO (4) vs. Esr1-/- (5) MSPPOH+LNAME+INDO			0	-23,86 to 23,86	No	ns		WT Bl6N +LNNA+INDO (4) vs. Esr1-/- (5) MSPPOH+LNAME+INDO			1.484	-22,37 to 25,34	No	ns		WT Bl6N +LNNA+INDO (4) vs. Esr1-/- (5) MSPPOH+LNAME+INDO			-5.569	-29,43 to 18,29	No	ns
	WT Bl6N +LNNA+INDO (4) vs. Esr1+/+ (4) LNAME+INDO+MSPPOH			0	-25,15 to 25,15	No	ns		WT Bl6N +LNNA+INDO (4) vs. Esr1+/+ (4) LNAME+INDO+MSPPOH			1.796	-23,35 to 26,94	No	ns		WT Bl6N +LNNA+INDO (4) vs. Esr1+/+ (4) LNAME+INDO+MSPPOH			-1.534	-26,68 to 23,61	No	ns
	WT Bl6N +LNNA+INDO (4) vs. Esr1 +/+			0	-21,04 to 21,04	No	ns		WT Bl6N +LNNA+INDO (4) vs. Esr1 +/+			-19.83	-40,87 to 1,206	No	ns		WT Bl6N +LNNA+INDO (4) vs. Esr1 +/+			-41.51	-62,55 to -20,47	Yes	****
	Esr1-/- CTL (8) vs. Esr1-/- (9) LNNA			0	-17,28 to 17,28	No	ns		Esr1-/- CTL (8) vs. Esr1-/- (9) LNNA			11.73	-5,556 to 29,01	No	ns		Esr1-/- CTL (8) vs. Esr1-/- (9) LNNA			9.165	-8,116 to 26,45	No	ns
	Esr1-/- CTL (8) vs. Esr1-/- (5) LNNA+INDO			0	-20,28 to 20,28	No	ns		Esr1-/- CTL (8) vs. Esr1-/- (5) LNNA+INDO			8.587	-11,69 to 28,86	No	ns		Esr1-/- CTL (8) vs. Esr1-/- (5) LNNA+INDO			7.647	-12,63 to 27,92	No	ns
	Esr1-/- CTL (8) vs. Esr1-/- (5) MSPPOH+LNAME+INDO			0	-20,28 to 20,28	No	ns		Esr1-/- CTL (8) vs. Esr1-/- (5) MSPPOH+LNAME+INDO			11.32	-8,959 to 31,59	No	ns		Esr1-/- CTL (8) vs. Esr1-/- (5) MSPPOH+LNAME+INDO			17.76	-2,516 to 38,03	No	ns
	Esr1-/- CTL (8) vs. Esr1+/+ (4) LNAME+INDO+MSPPOH			0	-21,78 to 21,78	No	ns		Esr1-/- CTL (8) vs. Esr1+/+ (4) LNAME+INDO+MSPPOH			11.63	-10,15 to 33,41	No	ns		Esr1-/- CTL (8) vs. Esr1+/+ (4) LNAME+INDO+MSPPOH			21.8	0,01607 to 43,57	Yes	*
	Esr1-/- CTL (8) vs. Esr1 +/+			0	-16,87 to 16,87	No	ns		Esr1-/- CTL (8) vs. Esr1 +/+			-10	-26,87 to 6,868	No	ns		Esr1-/- CTL (8) vs. Esr1 +/+			-18.18	-35,05 to -1,313	Yes	*
	Esr1-/- (9) LNNA vs. Esr1-/- (5) LNNA+INDO			0	-19,84 to 19,84	No	ns		Esr1-/- (9) LNNA vs. Esr1-/- (5) LNNA+INDO			-3.139	-22,98 to 16,70	No	ns		Esr1-/- (9) LNNA vs. Esr1-/- (5) LNNA+INDO			-1.519	-21,36 to 18,32	No	ns
	Esr1-/- (9) LNNA vs. Esr1-/- (5) MSPPOH+LNAME+INDO			0	-19,84 to 19,84	No	ns		Esr1-/- (9) LNNA vs. Esr1-/- (5) MSPPOH+LNAME+INDO			-0.4093	-20,25 to 19,43	No	ns		Esr1-/- (9) LNNA vs. Esr1-/- (5) MSPPOH+LNAME+INDO			8.594	-11,24 to 28,43	No	ns
	Esr1-/- (9) LNNA vs. Esr1+/+ (4) LNAME+INDO+MSPPOH			0	-21,37 to 21,37	No	ns		Esr1-/- (9) LNNA vs. Esr1+/+ (4) LNAME+INDO+MSPPOH			-0.09701	-21,47 to 21,27	No	ns		Esr1-/- (9) LNNA vs. Esr1+/+ (4) LNAME+INDO+MSPPOH			12.63	-8,742 to 34,00	No	ns
	Esr1-/- (9) LNNA vs. Esr1 +/+			0	-16,34 to 16,34	No	ns		Esr1-/- (9) LNNA vs. Esr1 +/+			-21.73	-38,07 to -5,387	Yes	**		Esr1-/- (9) LNNA vs. Esr1 +/+			-27.35	-43,69 to -11,01	Yes	****
	Esr1-/- (5) LNNA+INDO vs. Esr1-/- (5) MSPPOH+LNAME+INDO			0	-22,49 to 22,49	No	ns		Esr1-/- (5) LNNA+INDO vs. Esr1-/- (5) MSPPOH+LNAME+INDO			2.729	-19,76 to 25,22	No	ns		Esr1-/- (5) LNNA+INDO vs. Esr1-/- (5) MSPPOH+LNAME+INDO			10.11	-12,38 to 32,61	No	ns
	Esr1-/- (5) LNNA+INDO vs. Esr1+/+ (4) LNAME+INDO+MSPPOH			0	-23,86 to 23,86	No	ns		Esr1-/- (5) LNNA+INDO vs. Esr1+/+ (4) LNAME+INDO+MSPPOH			3.042	-20,82 to 26,90	No	ns		Esr1-/- (5) LNNA+INDO vs. Esr1+/+ (4) LNAME+INDO+MSPPOH			14.15	-9,709 to 38,01	No	ns
	Esr1-/- (5) LNNA+INDO vs. Esr1 +/+			0	-19,48 to 19,48	No	ns		Esr1-/- (5) LNNA+INDO vs. Esr1 +/+			-18.59	-38,07 to 0,8908	No	ns		Esr1-/- (5) LNNA+INDO vs. Esr1 +/+			-25.83	-45,31 to -6,350	Yes	**
	Esr1-/- (5) MSPPOH+LNAME+INDO vs. Esr1+/+ (4) LNAME+INDO+MSPPOH			0	-23,86 to 23,86	No	ns		Esr1-/- (5) MSPPOH+LNAME+INDO vs. Esr1+/+ (4) LNAME+INDO+MSPPOH			0.3123	-23,55 to 24,17	No	ns		Esr1-/- (5) MSPPOH+LNAME+INDO vs. Esr1+/+ (4) LNAME+INDO+MSPPOH			4.036	-19,82 to 27,89	No	ns
	Esr1-/- (5) MSPPOH+LNAME+INDO vs. Esr1 +/+			0	-19,48 to 19,48	No	ns		Esr1-/- (5) MSPPOH+LNAME+INDO vs. Esr1 +/+			-21.32	-40,80 to -1,839	Yes	*		Esr1-/- (5) MSPPOH+LNAME+INDO vs. Esr1 +/+			-35.94	-55,42 to -16,46	Yes	****
	Esr1+/+ (4) LNAME+INDO+MSPPOH vs. Esr1 +/+			0	-21,04 to 21,04	No	ns		Esr1+/+ (4) LNAME+INDO+MSPPOH vs. Esr1 +/+			-21.63	-42,67 to -0,5902	Yes	*		Esr1+/+ (4) LNAME+INDO+MSPPOH vs. Esr1 +/+			-39.98	-61,02 to -18,94	Yes	****
	Row 2								Row 5
	WT Bl6N +LNNA (6) vs. WT Bl6N +LNNA+INDO (4)			-1.222	-24,18 to 21,73	No	ns		WT Bl6N +LNNA (6) vs. WT Bl6N +LNNA+INDO (4)			8.297	-14,66 to 31,25	No	ns
	WT Bl6N +LNNA (6) vs. Esr1-/- CTL (8)			-1.961	-21,17 to 17,25	No	ns		WT Bl6N +LNNA (6) vs. Esr1-/- CTL (8)			-13.31	-32,52 to 5,893	No	ns
	WT Bl6N +LNNA (6) vs. Esr1-/- (9) LNNA			-0.3908	-19,14 to 18,35	No	ns		WT Bl6N +LNNA (6) vs. Esr1-/- (9) LNNA			-1.878	-20,62 to 16,87	No	ns
	WT Bl6N +LNNA (6) vs. Esr1-/- (5) LNNA+INDO			-1.236	-22,77 to 20,30	No	ns		WT Bl6N +LNNA (6) vs. Esr1-/- (5) LNNA+INDO			-7.021	-28,56 to 14,51	No	ns
	WT Bl6N +LNNA (6) vs. Esr1-/- (5) MSPPOH+LNAME+INDO			-0.181	-21,72 to 21,35	No	ns		WT Bl6N +LNNA (6) vs. Esr1-/- (5) MSPPOH+LNAME+INDO			1.336	-20,20 to 22,87	No	ns
	WT Bl6N +LNNA (6) vs. Esr1+/+ (4) LNAME+INDO+MSPPOH			-0.5989	-23,56 to 22,36	No	ns		WT Bl6N +LNNA (6) vs. Esr1+/+ (4) LNAME+INDO+MSPPOH			3.205	-19,75 to 26,16	No	ns
	WT Bl6N +LNNA (6) vs. Esr1 +/+			-5.487	-23,85 to 12,88	No	ns		WT Bl6N +LNNA (6) vs. Esr1 +/+			-30.23	-48,60 to -11,87	Yes	****
	WT Bl6N +LNNA+INDO (4) vs. Esr1-/- CTL (8)			-0.7388	-22,52 to 21,04	No	ns		WT Bl6N +LNNA+INDO (4) vs. Esr1-/- CTL (8)			-21.61	-43,39 to 0,1679	No	ns
	WT Bl6N +LNNA+INDO (4) vs. Esr1-/- (9) LNNA			0.8316	-20,54 to 22,20	No	ns		WT Bl6N +LNNA+INDO (4) vs. Esr1-/- (9) LNNA			-10.17	-31,55 to 11,20	No	ns
	WT Bl6N +LNNA+INDO (4) vs. Esr1-/- (5) LNNA+INDO			-0.01319	-23,87 to 23,84	No	ns		WT Bl6N +LNNA+INDO (4) vs. Esr1-/- (5) LNNA+INDO			-15.32	-39,17 to 8,541	No	ns
	WT Bl6N +LNNA+INDO (4) vs. Esr1-/- (5) MSPPOH+LNAME+INDO			1.041	-22,82 to 24,90	No	ns		WT Bl6N +LNNA+INDO (4) vs. Esr1-/- (5) MSPPOH+LNAME+INDO			-6.961	-30,82 to 16,90	No	ns
	WT Bl6N +LNNA+INDO (4) vs. Esr1+/+ (4) LNAME+INDO+MSPPOH			0.6234	-24,52 to 25,77	No	ns		WT Bl6N +LNNA+INDO (4) vs. Esr1+/+ (4) LNAME+INDO+MSPPOH			-5.092	-30,24 to 20,06	No	ns
	WT Bl6N +LNNA+INDO (4) vs. Esr1 +/+			-4.265	-25,31 to 16,78	No	ns		WT Bl6N +LNNA+INDO (4) vs. Esr1 +/+			-38.53	-59,57 to -17,49	Yes	****
	Esr1-/- CTL (8) vs. Esr1-/- (9) LNNA			1.57	-15,71 to 18,85	No	ns		Esr1-/- CTL (8) vs. Esr1-/- (9) LNNA			11.44	-5,845 to 28,72	No	ns
	Esr1-/- CTL (8) vs. Esr1-/- (5) LNNA+INDO			0.7256	-19,55 to 21,00	No	ns		Esr1-/- CTL (8) vs. Esr1-/- (5) LNNA+INDO			6.294	-13,98 to 26,57	No	ns
	Esr1-/- CTL (8) vs. Esr1-/- (5) MSPPOH+LNAME+INDO			1.78	-18,49 to 22,06	No	ns		Esr1-/- CTL (8) vs. Esr1-/- (5) MSPPOH+LNAME+INDO			14.65	-5,625 to 34,93	No	ns
	Esr1-/- CTL (8) vs. Esr1+/+ (4) LNAME+INDO+MSPPOH			1.362	-20,42 to 23,14	No	ns		Esr1-/- CTL (8) vs. Esr1+/+ (4) LNAME+INDO+MSPPOH			16.52	-5,260 to 38,30	No	ns
	Esr1-/- CTL (8) vs. Esr1 +/+			-3.526	-20,40 to 13,34	No	ns		Esr1-/- CTL (8) vs. Esr1 +/+			-16.92	-33,79 to -0,04886	Yes	*
	Esr1-/- (9) LNNA vs. Esr1-/- (5) LNNA+INDO			-0.8447	-20,68 to 18,99	No	ns		Esr1-/- (9) LNNA vs. Esr1-/- (5) LNNA+INDO			-5.142	-24,98 to 14,69	No	ns
	Esr1-/- (9) LNNA vs. Esr1-/- (5) MSPPOH+LNAME+INDO			0.2098	-19,63 to 20,05	No	ns		Esr1-/- (9) LNNA vs. Esr1-/- (5) MSPPOH+LNAME+INDO			3.214	-16,62 to 23,05	No	ns
	Esr1-/- (9) LNNA vs. Esr1+/+ (4) LNAME+INDO+MSPPOH			-0.2081	-21,58 to 21,16	No	ns		Esr1-/- (9) LNNA vs. Esr1+/+ (4) LNAME+INDO+MSPPOH			5.083	-16,29 to 26,45	No	ns
	Esr1-/- (9) LNNA vs. Esr1 +/+			-5.096	-21,44 to 11,24	No	ns		Esr1-/- (9) LNNA vs. Esr1 +/+			-28.36	-44,70 to -12,01	Yes	****
	Esr1-/- (5) LNNA+INDO vs. Esr1-/- (5) MSPPOH+LNAME+INDO			1.055	-21,44 to 23,55	No	ns		Esr1-/- (5) LNNA+INDO vs. Esr1-/- (5) MSPPOH+LNAME+INDO			8.357	-14,14 to 30,85	No	ns
	Esr1-/- (5) LNNA+INDO vs. Esr1+/+ (4) LNAME+INDO+MSPPOH			0.6366	-23,22 to 24,49	No	ns		Esr1-/- (5) LNNA+INDO vs. Esr1+/+ (4) LNAME+INDO+MSPPOH			10.23	-13,63 to 34,08	No	ns
	Esr1-/- (5) LNNA+INDO vs. Esr1 +/+			-4.252	-23,73 to 15,23	No	ns		Esr1-/- (5) LNNA+INDO vs. Esr1 +/+			-23.21	-42,69 to -3,733	Yes	**
	Esr1-/- (5) MSPPOH+LNAME+INDO vs. Esr1+/+ (4) LNAME+INDO+MSPPOH			-0.4179	-24,28 to 23,44	No	ns		Esr1-/- (5) MSPPOH+LNAME+INDO vs. Esr1+/+ (4) LNAME+INDO+MSPPOH			1.869	-21,99 to 25,73	No	ns
	Esr1-/- (5) MSPPOH+LNAME+INDO vs. Esr1 +/+			-5.306	-24,79 to 14,17	No	ns		Esr1-/- (5) MSPPOH+LNAME+INDO vs. Esr1 +/+			-31.57	-51,05 to -12,09	Yes	****
	Esr1+/+ (4) LNAME+INDO+MSPPOH vs. Esr1 +/+			-4.888	-25,93 to 16,15	No	ns		Esr1+/+ (4) LNAME+INDO+MSPPOH vs. Esr1 +/+			-33.44	-54,48 to -12,40	Yes	****
	Row 3								Row 6
	WT Bl6N +LNNA vs. WT Bl6N +LNNA+INDO (4)			1.033	-21,92 to 23,99	No	ns		WT Bl6N +LNNA (6) vs. WT Bl6N +LNNA+INDO (4)			8.393	-14,56 to 31,35	No	ns
	WT Bl6N +LNNA vs. Esr1-/- CTL (8)			-7.292	-26,50 to 11,92	No	ns		WT Bl6N +LNNA (6) vs. Esr1-/- CTL (8)			-11.5	-30,71 to 7,709	No	ns
	WT Bl6N +LNNA (6) vs. Esr1-/- (9) LNNA			4.95	-13,79 to 23,69	No	ns		WT Bl6N +LNNA (6) vs. Esr1-/- (9) LNNA			-6.442	-25,19 to 12,30	No	ns
	WT Bl6N +LNNA (6) vs. Esr1-/- (5) LNNA+INDO			1.414	-20,12 to 22,95	No	ns		WT Bl6N +LNNA (6) vs. Esr1-/- (5) LNNA+INDO			-5.23	-26,77 to 16,31	No	ns
	WT Bl6N +LNNA (6) vs. Esr1-/- (5) MSPPOH+LNAME+INDO			5.407	-16,13 to 26,94	No	ns		WT Bl6N +LNNA (6) vs. Esr1-/- (5) MSPPOH+LNAME+INDO			2.189	-19,35 to 23,72	No	ns
	WT Bl6N +LNNA (6) vs. Esr1+/+ (4) LNAME+INDO+MSPPOH			3.092	-19,87 to 26,05	No	ns		WT Bl6N +LNNA (6) vs. Esr1+/+ (4) LNAME+INDO+MSPPOH			4.051	-18,91 to 27,01	No	ns
	WT Bl6N +LNNA (6) vs. Esr1 +/+			-10.78	-29,14 to 7,589	No	ns		WT Bl6N +LNNA (6) vs. Esr1 +/+			-32.09	-50,46 to -13,73	Yes	****
	WT Bl6N +LNNA+INDO (4) vs. Esr1-/- CTL (8)			-8.325	-30,10 to 13,45	No	ns		WT Bl6N +LNNA+INDO (4) vs. Esr1-/- CTL (8)			-19.89	-41,67 to 1,887	No	ns
	WT Bl6N +LNNA+INDO (4) vs. Esr1-/- (9) LNNA			3.917	-17,46 to 25,29	No	ns		WT Bl6N +LNNA+INDO (4) vs. Esr1-/- (9) LNNA			-14.84	-36,21 to 6,536	No	ns
	WT Bl6N +LNNA+INDO (4) vs. Esr1-/- (5) LNNA+INDO			0.3808	-23,48 to 24,24	No	ns		WT Bl6N +LNNA+INDO (4) vs. Esr1-/- (5) LNNA+INDO			-13.62	-37,48 to 10,24	No	ns
	WT Bl6N +LNNA+INDO (4) vs. Esr1-/- (5) MSPPOH+LNAME+INDO			4.373	-19,48 to 28,23	No	ns		WT Bl6N +LNNA+INDO (4) vs. Esr1-/- (5) MSPPOH+LNAME+INDO			-6.204	-30,06 to 17,65	No	ns
	WT Bl6N +LNNA+INDO (4) vs. Esr1+/+ (4) LNAME+INDO+MSPPOH			2.058	-23,09 to 27,21	No	ns		WT Bl6N +LNNA+INDO (4) vs. Esr1+/+ (4) LNAME+INDO+MSPPOH			-4.342	-29,49 to 20,81	No	ns
	WT Bl6N +LNNA+INDO (4) vs. Esr1 +/+			-11.81	-32,85 to 9,230	No	ns		WT Bl6N +LNNA+INDO (4) vs. Esr1 +/+			-40.48	-61,52 to -19,44	Yes	****
	Esr1-/- CTL (8) vs. Esr1-/- (9) LNNA			12.24	-5,040 to 29,52	No	ns		Esr1-/- CTL (8) vs. Esr1-/- (9) LNNA			5.056	-12,23 to 22,34	No	ns
	Esr1-/- CTL (8) vs. Esr1-/- (5) LNNA+INDO			8.706	-11,57 to 28,98	No	ns		Esr1-/- CTL (8) vs. Esr1-/- (5) LNNA+INDO			6.269	-14,01 to 26,54	No	ns
	Esr1-/- CTL (8) vs. Esr1-/- (5) MSPPOH+LNAME+INDO			12.7	-7,577 to 32,97	No	ns		Esr1-/- CTL (8) vs. Esr1-/- (5) MSPPOH+LNAME+INDO			13.69	-6,587 to 33,96	No	ns
	Esr1-/- CTL (8) vs. Esr1+/+ (4) LNAME+INDO+MSPPOH			10.38	-11,40 to 32,16	No	ns		Esr1-/- CTL (8) vs. Esr1+/+ (4) LNAME+INDO+MSPPOH			15.55	-6,229 to 37,33	No	ns
	Esr1-/- CTL (8) vs. Esr1 +/+			-3.485	-20,36 to 13,38	No	ns		Esr1-/- CTL (8) vs. Esr1 +/+			-20.59	-37,46 to -3,723	Yes	**
	Esr1-/- (9) LNNA vs. Esr1-/- (5) LNNA+INDO			-3.536	-23,37 to 16,30	No	ns		Esr1-/- (9) LNNA vs. Esr1-/- (5) LNNA+INDO			1.213	-18,62 to 21,05	No	ns
	Esr1-/- (9) LNNA vs. Esr1-/- (5) MSPPOH+LNAME+INDO			0.4565	-19,38 to 20,29	No	ns		Esr1-/- (9) LNNA vs. Esr1-/- (5) MSPPOH+LNAME+INDO			8.632	-11,21 to 28,47	No	ns
	Esr1-/- (9) LNNA vs. Esr1+/+ (4) LNAME+INDO+MSPPOH			-1.859	-23,23 to 19,51	No	ns		Esr1-/- (9) LNNA vs. Esr1+/+ (4) LNAME+INDO+MSPPOH			10.49	-10,88 to 31,87	No	ns
	Esr1-/- (9) LNNA vs. Esr1 +/+			-15.73	-32,07 to 0,6136	No	ns		Esr1-/- (9) LNNA vs. Esr1 +/+			-25.65	-41,99 to -9,308	Yes	****
	Esr1-/- (5) LNNA+INDO vs. Esr1-/- (5) MSPPOH+LNAME+INDO			3.992	-18,50 to 26,49	No	ns		Esr1-/- (5) LNNA+INDO vs. Esr1-/- (5) MSPPOH+LNAME+INDO			7.419	-15,07 to 29,91	No	ns
	Esr1-/- (5) LNNA+INDO vs. Esr1+/+ (4) LNAME+INDO+MSPPOH			1.677	-22,18 to 25,54	No	ns		Esr1-/- (5) LNNA+INDO vs. Esr1+/+ (4) LNAME+INDO+MSPPOH			9.281	-14,58 to 33,14	No	ns
	Esr1-/- (5) LNNA+INDO vs. Esr1 +/+			-12.19	-31,67 to 7,288	No	ns		Esr1-/- (5) LNNA+INDO vs. Esr1 +/+			-26.86	-46,34 to -7,382	Yes	***
	Esr1-/- (5) MSPPOH+LNAME+INDO vs. Esr1+/+ (4) LNAME+INDO+MSPPOH			-2.315	-26,17 to 21,54	No	ns		Esr1-/- (5) MSPPOH+LNAME+INDO vs. Esr1+/+ (4) LNAME+INDO+MSPPOH			1.862	-22,00 to 25,72	No	ns
	Esr1-/- (5) MSPPOH+LNAME+INDO vs. Esr1 +/+			-16.18	-35,66 to 3,296	No	ns		Esr1-/- (5) MSPPOH+LNAME+INDO vs. Esr1 +/+			-34.28	-53,76 to -14,80	Yes	****
	Esr1+/+ (4) LNAME+INDO+MSPPOH vs. Esr1 +/+			-13.87	-34,91 to 7,172	No	ns		ERα+/+ (4) LNAME+INDO+MSPPOH vs. Esr1 +/+			-36.14	-57,18 to -15,10	Yes	****
	Figure 4 supplement Figure 1, panel C-D
	Flow rate	% dilation		WT								Flow rate	% dilation		C451A-ERα
	3	0	0	0	0	0	0					3	0	0	0	0	0	0	0	0	0	0	0	0	0	0
	6	1.25	5.05051	0.278351	0.34615	0.21622	1.36364					6	23.81	0	21.429	16.6667	23.478	3.252	9.174	7.778	6.202	5.042	21.2121	4.87805	5.88235	2.88462
	9	28.75	31.3131	10.6186	2.11539	10	12.7273					9	44.444	0	35.714	4.44444	28.696	8.943	11.927	12.222	11.628	10.924	37.8788	7.31707	6.72269	3.84615
	15	43.75	37.3737	38.4536	12.6923	20.8108	26.3636					15	47.619	0	35.714	20	42.609	7.317	13.761	6.667	20.155	23.529	45.4545	8.94309	11.7647	4.80769
	21	66.25	43.4344	54.9485	48.0769	37.973	37.7273					21	50.794	9.677	65.714	43.3333	45.217	9.756	13.761	4.444	35.659	31.933	75.7576	19.5122	24.3697	13.4615
	30	76.25	45.4545	66.2886	59.6154	42.7838	43.4091					30	49.206	19.355	72.857	54.4444	47.826	12.195	17.431	5.556	44.186	42.017	89.3939	29.2683	38.6555	28.8462
	50	76.25	38.3838	67.3196	56.7308	45.1351	45.4091					50	52.381	29.032	84.286	54.4444	38.261	11.382	19.266	18.889	37.984	44.538	78.7879	28.4553	37.8151	30.7692
	Flow rate	% dilation		WT	with LNNA							Flow rate	% dilation		C451A-ERα	with LNNA
	3	0	0	0	0	0	0	0	0	0		3	0	0	0	0	0	0
	6	4.286	-3.846	9.836	5.926	4.63	2.874	1.878	3.2967	0.581		6	8.85	12.844	1.176	6.28272	2.548	11.561
	9	-1.429	-3.846	19.672	8.889	10.185	4.023	2.817	3.2967	3.488		9	12.389	14.679	2.353	15.1832	4.459	21.387
	15	1.429	-2.885	22.951	12.593	18.519	6.322	6.573	3.2967	2.326		15	20.354	11.927	1.765	28.7958	7.643	30.058
	21	4.286	2.404	27.869	31.852	24.074	23.563	15.962	8.24176	8.14		21	31.858	24.771	7.059	44.5026	10.191	36.416
	30	15.714	-1.442	26.23	42.222	25.926	37.356	23.005	18.6813	9.302		30	41.593	29.358	11.765	48.6911	12.102	34.682
	50	21.429	0	26.23	48.889	25	37.931	23.474	13.7363	8.721		50	38.938	32.11	12.941	49.2147	14.65	32.948
	Flow rate	% dilation		WT	with LNNA and indo							Flow rate	% dilation	C451A-ERα	with LNNA and indo
	3	0	0	0	0							3	0	0	0	0
	6	13.58	10.169	1.676	2.7							6	4.878	5.224	2.762	8.383
	9	20.988	20.339	0.559	6.197							9	4.268	13.433	14.917	8.982
	15	35.802	23.729	2.235	6.048							15	7.317	17.164	16.575	16.168
	21	28.395	22.599	7.821	4.83							21	10.976	27.612	17.68	14.97
	30	37.037	31.638	11.173	8.354							30	15.854	30.597	20.994	17.365
	50	25.926	36.158	2.793	11.062							50	17.683	32.836	21.547	14.371
	Flow rate	% dilation		WT	with LNNA, indo & MSPPOH							Flow rate	% dilation	C451A-ERα	with LNNA, indo & MSPPOH
	3	0	0	0	0							3	0	0	0
	6	13.131	-3.125	13.131	-3.125							6	7.018	4	6.098
	9	29.293	-5.208	19.293	-5.208							9	13.158	7.333	12.195
	15	24.242	-3.125	24.242	-3.125							15	7.895	10	12.195
	21	30.505	5.208	40.505	5.208							21	10.526	15.333	21.951
	30	30.606	5.208	50	5.208							30	11.404	16	39.024
	50	21.414	0	41.414	0							50	14.035	14.667	32.927
	Bonferroni's multiple comparisons test			Mean Diff,	95% CI of diff,	Significant?	Summary		Bonferroni's multiple comparisons test			Mean Diff,	95% CI of diff,	Significant?	Summary		Bonferroni's multiple comparisons test			Mean Diff,	95% CI of diff,	Significant?	Summary
	Row 1								Row 4
	WT Bl6N +LNNA vs. C451A-/- +LNNA			0	-20,68 to 20,68	No	ns		WT Bl6N +LNNA vs. C451A-/- +LNNA			-0.2639	-20,95 to 20,42	No	ns		Row 7
	WT Bl6N +LNNA vs. WT Bl6N +LNNA+INDO			0	-23,12 to 23,12	No	ns		WT Bl6N +LNNA vs. WT Bl6N +LNNA+INDO			-0.4602	-23,58 to 22,66	No	ns		WT Bl6N +LNNA vs. C451A-/- +LNNA			-1.962	-22,65 to 18,72	No	ns
	WT Bl6N +LNNA vs. C451A-/- +LNNA+INDO			0	-23,12 to 23,12	No	ns		WT Bl6N +LNNA vs. C451A-/- +LNNA+INDO			2.187	-20,94 to 25,31	No	ns		WT Bl6N +LNNA vs. WT Bl6N +LNNA+INDO			9.187	-13,94 to 32,31	No	ns
	WT Bl6N +LNNA vs. C451A+/+ +LNNA+INDO+MSPPOH			0	-23,12 to 23,12	No	ns		WT Bl6N +LNNA vs. C451A+/+ +LNNA+INDO+MSPPOH			5.935	-17,19 to 29,06	No	ns		WT Bl6N +LNNA vs. C451A-/- +LNNA+INDO			6.562	-16,56 to 29,69	No	ns
	WT Bl6N +LNNA vs. C451A-/- +LNNA+INDO+MSPPOH			0	-25,33 to 25,33	No	ns		WT Bl6N +LNNA vs. C451A-/- +LNNA+INDO+MSPPOH			6.463	-18,87 to 31,79	No	ns		WT Bl6N +LNNA vs. C451A+/+ +LNNA+INDO+MSPPOH			12.46	-10,66 to 35,59	No	ns
	WT Bl6N +LNNA vs. WT Bl6N			0	-20,68 to 20,68	No	ns		WT Bl6N +LNNA vs. WT Bl6N			-13.64	-34,33 to 7,038	No	ns		WT Bl6N +LNNA vs. C451A-/- +LNNA+INDO+MSPPOH			7.628	-17,70 to 32,96	No	ns
	C451A-/- +LNNA vs. WT Bl6N +LNNA+INDO			0	-23,12 to 23,12	No	ns		C451A-/- +LNNA vs. WT Bl6N +LNNA+INDO			-0.1964	-23,32 to 22,93	No	ns		WT Bl6N +LNNA vs. WT Bl6N			-16.08	-36,76 to 4,606	No	ns
	C451A-/- +LNNA vs. C451A-/- +LNNA+INDO			0	-23,12 to 23,12	No	ns		C451A-/- +LNNA vs. C451A-/- +LNNA+INDO			2.451	-20,67 to 25,58	No	ns		C451A-/- +LNNA vs. WT Bl6N +LNNA+INDO			11.15	-11,98 to 34,27	No	ns
	C451A-/- +LNNA vs. C451A+/+ +LNNA+INDO+MSPPOH			0	-23,12 to 23,12	No	ns		C451A-/- +LNNA vs. C451A+/+ +LNNA+INDO+MSPPOH			6.199	-16,93 to 29,32	No	ns		C451A-/- +LNNA vs. C451A-/- +LNNA+INDO			8.524	-14,60 to 31,65	No	ns
	C451A-/- +LNNA vs. C451A-/- +LNNA+INDO+MSPPOH			0	-25,33 to 25,33	No	ns		C451A-/- +LNNA vs. C451A-/- +LNNA+INDO+MSPPOH			6.727	-18,60 to 32,06	No	ns		C451A-/- +LNNA vs. C451A+/+ +LNNA+INDO+MSPPOH			14.43	-8,698 to 37,55	No	ns
	C451A-/- +LNNA vs. WT Bl6N			0	-20,68 to 20,68	No	ns		C451A-/- +LNNA vs. WT Bl6N			-13.38	-34,06 to 7,302	No	ns		C451A-/- +LNNA vs. C451A-/- +LNNA+INDO+MSPPOH			9.591	-15,74 to 34,92	No	ns
	WT Bl6N +LNNA+INDO vs. C451A-/- +LNNA+INDO			0	-25,33 to 25,33	No	ns		WT Bl6N +LNNA+INDO vs. C451A-/- +LNNA+INDO			2.648	-22,68 to 27,98	No	ns		C451A-/- +LNNA vs. WT Bl6N			-14.11	-34,80 to 6,568	No	ns
	WT Bl6N +LNNA+INDO vs. C451A+/+ +LNNA+INDO+MSPPOH			0	-25,33 to 25,33	No	ns		WT Bl6N +LNNA+INDO vs. C451A+/+ +LNNA+INDO+MSPPOH			6.395	-18,94 to 31,73	No	ns		WT Bl6N +LNNA+INDO vs. C451A-/- +LNNA+INDO			-2.625	-27,96 to 22,71	No	ns
	WT Bl6N +LNNA+INDO vs. C451A-/- +LNNA+INDO+MSPPOH			0	-27,36 to 27,36	No	ns		WT Bl6N +LNNA+INDO vs. C451A-/- +LNNA+INDO+MSPPOH			6.924	-20,44 to 34,28	No	ns		WT Bl6N +LNNA+INDO vs. C451A+/+ +LNNA+INDO+MSPPOH			3.278	-22,05 to 28,61	No	ns
	WT Bl6N +LNNA+INDO vs. WT Bl6N			0	-23,12 to 23,12	No	ns		WT Bl6N +LNNA+INDO vs. WT Bl6N			-13.18	-36,31 to 9,940	No	ns		WT Bl6N +LNNA+INDO vs. C451A-/- +LNNA+INDO+MSPPOH			-1.558	-28,92 to 25,80	No	ns
	C451A-/- +LNNA+INDO vs. C451A+/+ +LNNA+INDO+MSPPOH			0	-25,33 to 25,33	No	ns		C451A-/- +LNNA+INDO vs. C451A+/+ +LNNA+INDO+MSPPOH			3.748	-21,58 to 29,08	No	ns		WT Bl6N +LNNA+INDO vs. WT Bl6N			-25.26	-48,39 to -2,139	Yes	*
	C451A-/- +LNNA+INDO vs. C451A-/- +LNNA+INDO+MSPPOH			0	-27,36 to 27,36	No	ns		C451A-/- +LNNA+INDO vs. C451A-/- +LNNA+INDO+MSPPOH			4.276	-23,09 to 31,64	No	ns		C451A-/- +LNNA+INDO vs. C451A+/+ +LNNA+INDO+MSPPOH			5.902	-19,43 to 31,23	No	ns
	C451A-/- +LNNA+INDO vs. WT Bl6N			0	-23,12 to 23,12	No	ns		C451A-/- +LNNA+INDO vs. WT Bl6N			-15.83	-38,96 to 7,292	No	ns		C451A-/- +LNNA+INDO vs. C451A-/- +LNNA+INDO+MSPPOH			1.066	-26,29 to 28,43	No	ns
	C451A+/+ +LNNA+INDO+MSPPOH vs. C451A-/- +LNNA+INDO+MSPPOH			0	-27,36 to 27,36	No	ns		C451A+/+ +LNNA+INDO+MSPPOH vs. C451A-/- +LNNA+INDO+MSPPOH			0.5285	-26,83 to 27,89	No	ns		C451A-/- +LNNA+INDO vs. WT Bl6N			-22.64	-45,76 to 0,4850	No	ns
	C451A+/+ +LNNA+INDO+MSPPOH vs. WT Bl6N			0	-23,12 to 23,12	No	ns		C451A+/+ +LNNA+INDO+MSPPOH vs. WT Bl6N			-19.58	-42,70 to 3,545	No	ns		C451A+/+ +LNNA+INDO+MSPPOH vs. C451A-/- +LNNA+INDO+MSPPOH			-4.836	-32,20 to 22,53	No	ns
	C451A-/- +LNNA+INDO+MSPPOH vs. WT Bl6N			0	-25,33 to 25,33	No	ns		C451A-/- +LNNA+INDO+MSPPOH vs. WT Bl6N			-20.11	-45,44 to 5,223	No	ns		C451A+/+ +LNNA+INDO+MSPPOH vs. WT Bl6N			-28.54	-51,67 to -5,417	Yes	**
																	C451A-/- +LNNA+INDO+MSPPOH vs. WT Bl6N			-23.71	-49,04 to 1,626	No	ns
	Row 2								Row 5
	WT Bl6N +LNNA vs. C451A-/- +LNNA			-1.401	-22,08 to 19,28	No	ns		WT Bl6N +LNNA vs. C451A-/- +LNNA			-1.592	-22,27 to 19,09	No	ns
	WT Bl6N +LNNA vs. WT Bl6N +LNNA+INDO			-1.222	-24,35 to 21,90	No	ns		WT Bl6N +LNNA vs. WT Bl6N +LNNA+INDO			8.297	-14,83 to 31,42	No	ns
	WT Bl6N +LNNA vs. C451A-/- +LNNA+INDO			0.4972	-22,63 to 23,62	No	ns		WT Bl6N +LNNA vs. C451A-/- +LNNA+INDO			6.398	-16,73 to 29,52	No	ns
	WT Bl6N +LNNA vs. C451A+/+ +LNNA+INDO+MSPPOH			0.8059	-22,32 to 23,93	No	ns		WT Bl6N +LNNA vs. C451A+/+ +LNNA+INDO+MSPPOH			3.851	-19,27 to 26,98	No	ns
	WT Bl6N +LNNA vs. C451A-/- +LNNA+INDO+MSPPOH			0.1036	-25,23 to 25,44	No	ns		WT Bl6N +LNNA vs. C451A-/- +LNNA+INDO+MSPPOH			8.271	-17,06 to 33,60	No	ns
	WT Bl6N +LNNA vs. WT Bl6N			-9.42	-30,10 to 11,26	No	ns		WT Bl6N +LNNA vs. WT Bl6N			-19.72	-40,40 to 0,9679	No	ns
	C451A-/- +LNNA vs. WT Bl6N +LNNA+INDO			0.179	-22,95 to 23,30	No	ns		C451A-/- +LNNA vs. WT Bl6N +LNNA+INDO			9.888	-13,24 to 33,01	No	ns
	C451A-/- +LNNA vs. C451A-/- +LNNA+INDO			1.899	-21,23 to 25,02	No	ns		C451A-/- +LNNA vs. C451A-/- +LNNA+INDO			7.99	-15,13 to 31,11	No	ns
	C451A-/- +LNNA vs. C451A+/+ +LNNA+INDO+MSPPOH			2.207	-20,92 to 25,33	No	ns		C451A-/- +LNNA vs. C451A+/+ +LNNA+INDO+MSPPOH			5.443	-17,68 to 28,57	No	ns
	C451A-/- +LNNA vs. C451A-/- +LNNA+INDO+MSPPOH			1.505	-23,83 to 26,84	No	ns		C451A-/- +LNNA vs. C451A-/- +LNNA+INDO+MSPPOH			9.863	-15,47 to 35,19	No	ns
	C451A-/- +LNNA vs. WT Bl6N			-8.019	-28,70 to 12,66	No	ns		C451A-/- +LNNA vs. WT Bl6N			-18.12	-38,81 to 2,560	No	ns
	WT Bl6N +LNNA+INDO vs. C451A-/- +LNNA+INDO			1.72	-23,61 to 27,05	No	ns		WT Bl6N +LNNA+INDO vs. C451A-/- +LNNA+INDO			-1.898	-27,23 to 23,43	No	ns
	WT Bl6N +LNNA+INDO vs. C451A+/+ +LNNA+INDO+MSPPOH			2.028	-23,30 to 27,36	No	ns		WT Bl6N +LNNA+INDO vs. C451A+/+ +LNNA+INDO+MSPPOH			-4.445	-29,78 to 20,89	No	ns
	WT Bl6N +LNNA+INDO vs. C451A-/- +LNNA+INDO+MSPPOH			1.326	-26,04 to 28,69	No	ns		WT Bl6N +LNNA+INDO vs. C451A-/- +LNNA+INDO+MSPPOH			-0.02542	-27,39 to 27,34	No	ns
	WT Bl6N +LNNA+INDO vs. WT Bl6N			-8.198	-31,32 to 14,93	No	ns		WT Bl6N +LNNA+INDO vs. WT Bl6N			-28.01	-51,14 to -4,887	Yes	**
	C451A-/- +LNNA+INDO vs. C451A+/+ +LNNA+INDO+MSPPOH			0.3088	-25,02 to 25,64	No	ns		C451A-/- +LNNA+INDO vs. C451A+/+ +LNNA+INDO+MSPPOH			-2.547	-27,88 to 22,78	No	ns
	C451A-/- +LNNA+INDO vs. C451A-/- +LNNA+INDO+MSPPOH			-0.3936	-27,75 to 26,97	No	ns		C451A-/- +LNNA+INDO vs. C451A-/- +LNNA+INDO+MSPPOH			1.873	-25,49 to 29,23	No	ns
	C451A-/- +LNNA+INDO vs. WT Bl6N			-9.917	-33,04 to 13,21	No	ns		C451A-/- +LNNA+INDO vs. WT Bl6N			-26.11	-49,24 to -2,989	Yes	*
	C451A+/+ +LNNA+INDO+MSPPOH vs. C451A-/- +LNNA+INDO+MSPPOH			-0.7023	-28,06 to 26,66	No	ns		C451A+/+ +LNNA+INDO+MSPPOH vs. C451A-/- +LNNA+INDO+MSPPOH			4.42	-22,94 to 31,78	No	ns
	C451A+/+ +LNNA+INDO+MSPPOH vs. WT Bl6N			-10.23	-33,35 to 12,90	No	ns		C451A+/+ +LNNA+INDO+MSPPOH vs. WT Bl6N			-23.57	-46,69 to -0,4420	Yes	*
	C451A-/- +LNNA+INDO+MSPPOH vs. WT Bl6N			-9.524	-34,86 to 15,81	No	ns		C451A-/- +LNNA+INDO+MSPPOH vs. WT Bl6N			-27.99	-53,32 to -2,655	Yes	*
	Row 3								Row 6
	WT Bl6N +LNNA vs. C451A-/- +LNNA			1.312	-19,37 to 22,00	No	ns		WT Bl6N +LNNA vs. C451A-/- +LNNA			0.7449	-19,94 to 21,43	No	ns
	WT Bl6N +LNNA vs. WT Bl6N +LNNA+INDO			1.033	-22,09 to 24,16	No	ns		WT Bl6N +LNNA vs. WT Bl6N +LNNA+INDO			8.393	-14,73 to 31,52	No	ns
	WT Bl6N +LNNA vs. C451A-/- +LNNA+INDO			2.654	-20,47 to 25,78	No	ns		WT Bl6N +LNNA vs. C451A-/- +LNNA+INDO			9.241	-13,88 to 32,37	No	ns
	WT Bl6N +LNNA vs. C451A+/+ +LNNA+INDO+MSPPOH			3.512	-19,61 to 26,64	No	ns		WT Bl6N +LNNA vs. C451A+/+ +LNNA+INDO+MSPPOH			7.688	-15,44 to 30,81	No	ns
	WT Bl6N +LNNA vs. C451A-/- +LNNA+INDO+MSPPOH			2.159	-23,17 to 27,49	No	ns		WT Bl6N +LNNA vs. C451A-/- +LNNA+INDO+MSPPOH			8.301	-17,03 to 33,63	No	ns
	WT Bl6N +LNNA vs. WT Bl6N			-10.2	-30,88 to 10,49	No	ns		WT Bl6N +LNNA vs. WT Bl6N			-28.26	-48,95 to -7,580	Yes	***
	C451A-/- +LNNA vs. WT Bl6N +LNNA+INDO			-0.279	-23,40 to 22,85	No	ns		C451A-/- +LNNA vs. WT Bl6N +LNNA+INDO			7.648	-15,48 to 30,77	No	ns
	C451A-/- +LNNA vs. C451A-/- +LNNA+INDO			1.342	-21,78 to 24,47	No	ns		C451A-/- +LNNA vs. C451A-/- +LNNA+INDO			8.496	-14,63 to 31,62	No	ns
	C451A-/- +LNNA vs. C451A+/+ +LNNA+INDO+MSPPOH			2.199	-20,93 to 25,32	No	ns		C451A-/- +LNNA vs. C451A+/+ +LNNA+INDO+MSPPOH			6.943	-16,18 to 30,07	No	ns
	C451A-/- +LNNA vs. C451A-/- +LNNA+INDO+MSPPOH			0.8464	-24,49 to 26,18	No	ns		C451A-/- +LNNA vs. C451A-/- +LNNA+INDO+MSPPOH			7.556	-17,78 to 32,89	No	ns
	C451A-/- +LNNA vs. WT Bl6N			-11.51	-32,19 to 9,174	No	ns		C451A-/- +LNNA vs. WT Bl6N			-29.01	-49,69 to -8,325	Yes	***
	WT Bl6N +LNNA+INDO vs. C451A-/- +LNNA+INDO			1.621	-23,71 to 26,95	No	ns		WT Bl6N +LNNA+INDO vs. C451A-/- +LNNA+INDO			0.848	-24,48 to 26,18	No	ns
	WT Bl6N +LNNA+INDO vs. C451A+/+ +LNNA+INDO+MSPPOH			2.478	-22,85 to 27,81	No	ns		WT Bl6N +LNNA+INDO vs. C451A+/+ +LNNA+INDO+MSPPOH			-0.705	-26,04 to 24,63	No	ns
	WT Bl6N +LNNA+INDO vs. C451A-/- +LNNA+INDO+MSPPOH			1.125	-26,24 to 28,49	No	ns		WT Bl6N +LNNA+INDO vs. C451A-/- +LNNA+INDO+MSPPOH			-0.09217	-27,45 to 27,27	No	ns
	WT Bl6N +LNNA+INDO vs. WT Bl6N			-11.23	-34,35 to 11,89	No	ns		WT Bl6N +LNNA+INDO vs. WT Bl6N			-36.66	-59,78 to -13,53	Yes	****
	C451A-/- +LNNA+INDO vs. C451A+/+ +LNNA+INDO+MSPPOH			0.8575	-24,47 to 26,19	No	ns		C451A-/- +LNNA+INDO vs. C451A+/+ +LNNA+INDO+MSPPOH			-1.553	-26,88 to 23,78	No	ns
	C451A-/- +LNNA+INDO vs. C451A-/- +LNNA+INDO+MSPPOH			-0.4953	-27,86 to 26,87	No	ns		C451A-/- +LNNA+INDO vs. C451A-/- +LNNA+INDO+MSPPOH			-0.9402	-28,30 to 26,42	No	ns
	C451A-/- +LNNA+INDO vs. WT Bl6N			-12.85	-35,98 to 10,27	No	ns		C451A-/- +LNNA+INDO vs. WT Bl6N			-37.5	-60,63 to -14,38	Yes	****
	C451A+/+ +LNNA+INDO+MSPPOH vs. C451A-/- +LNNA+INDO+MSPPOH			-1.353	-28,71 to 26,01	No	ns		C451A+/+ +LNNA+INDO+MSPPOH vs. C451A-/- +LNNA+INDO+MSPPOH			0.6128	-26,75 to 27,97	No	ns
	C451A+/+ +LNNA+INDO+MSPPOH vs. WT Bl6N			-13.71	-36,83 to 9,416	No	ns		C451A+/+ +LNNA+INDO+MSPPOH vs. WT Bl6N			-35.95	-59,08 to -12,83	Yes	****
	C451A-/- +LNNA+INDO+MSPPOH vs. WT Bl6N			-12.36	-37,69 to 12,98	No	ns		C451A-/- +LNNA+INDO+MSPPOH vs. WT Bl6N			-36.56	-61,90 to -11,23	Yes	***
	Figure 4 supplement Figure 1, panel E-F
	FLOW	% dilation	WT									Flow rate	% dilation		AF2-ERα
	3	0	0	0	0	0	0	0	0			3	0	0	0	0	0	0	0	0
	6	14.286	9.96	12	18.8235	0.934579	12.676	13.861	7.579			6	9.091	5.333	2.752	15	12.7907	11.494	22.059	0
	9	27.143	10.284	10.667	29.4118	4.6729	33.803	17.822	8.484			9	18.182	9.333	6.422	28.75	22.093	18.391	29.412	3.077
	15	40	25.043	25.333	38.8235	10.2804	42.254	28.713	24.819			15	24.242	14.667	11.009	41.25	34.8837	18.966	44.118	33.846
	21	55.714	49.228	44	52.9412	17.757	53.521	45.545	35.96			21	68.182	21.333	14.679	50	55.8139	25.287	64.706	41.538
	30	62.857	66.653	64	63.5294	34.5794	61.972	73.267	39.204			30	71.212	30.667	14.679	76.25	69.7674	40.805	82.353	76.923
	50	55.714	57.703	56	61.1765	35.514	47.887	70.297	38.117			50	51.515	32	18.349	66.25	55.8139	45.977	83.824	67.692
	FLOW	% dilation	WT + L-NNA									Flow rate	% dilation		AF2-ERα	with LNNA
	3	0	0	0	0	0	0	0	0	0		3	0	0	0	0	0	0
	6	4.286	-3.846	9.836	5.926	4.63	2.874	1.878	3.2967	0.581		6	8.85	12.844	1.176	6.28272	2.548	11.561
	9	-1.429	-3.846	19.672	8.889	10.185	4.023	2.817	3.2967	3.488		9	12.389	14.679	2.353	15.1832	4.459	21.387
	15	1.429	-2.885	22.951	12.593	18.519	6.322	6.573	3.2967	2.326		15	20.354	11.927	1.765	28.7958	7.643	30.058
	21	4.286	2.404	27.869	31.852	24.074	23.563	15.962	8.24176	8.14		21	31.858	24.771	7.059	44.5026	10.191	36.416
	30	15.714	-1.442	26.23	42.222	25.926	37.356	23.005	18.6813	9.302		30	41.593	29.358	11.765	48.6911	12.102	34.682
	50	21.429	0	26.23	48.889	25	37.931	23.474	13.7363	8.721		50	38.938	32.11	12.941	49.2147	14.65	32.948
	FLOW	% dilation	WT + L-NNA + indo									Flow rate	% dilation	AF2-ERα	with LNNA and indo
	3	0	0	0	0	0						3	0	0	0	0	0	0	0	0
	6	9.565	7.767	0.613	2.5	9.62963						6	0	0.649	7.534	3.185	5.426	7.339	0.99	7.563
	9	11.304	14.563	0.613	4.375	16.2963						9	-1.515	1.948	10.959	7.643	12.403	17.431	5.941	5.042
	15	20	23.301	6.135	9.375	24.4444						15	3.03	1.299	13.014	10.828	11.628	24.771	16.832	2.521
	21	18.261	36.893	6.748	10.625	25.1852						21	7.576	1.299	13.699	15.924	20.155	32.11	32.673	6.723
	30	18.261	54.369	15.951	11.875	31.8518						30	7.576	0	15.753	21.019	24.031	33.028	48.515	14.286
	50	13.913	33.01	14.11	6.875	40						50	10.606	0	19.863	21.019	26.357	26.606	46.535	5.042
	FLOW	% dilation	WT + L-NNA + indo + MSPPOH									Flow rate	% dilation	AF2-ERα	with LNNA, indo & MSPPOH
	3	0	0	0	0							3	0	0	0	0	0
	6	4.202	3.96825	16.456	1.00503							6	5.20231	5	9.589	5.45231	4
	9	8.403	5.55556	18.354	7.53769							9	8.67052	6	21.918	9.67052	8
	15	8.403	15.873	22.785	13.5678							15	9.24855	10	34.247	11.2486	12
	21	16.807	23.0159	29.114	15.0754							21	4.62428	27	39.726	14.6243	15
	30	29.412	23.0159	33.544	19.598							30	6.35838	36	50.685	16.3584	13
	50	15.966	23.0159	33.544	9.54774							50	10.4046	34	52.055	13.4046	12
	ANOVA repeated mesurements
	Bonferroni's multiple comparisons test			Mean Diff,	95% CI of diff,	Significant?	Summary		Bonferroni's multiple comparisons test			Mean Diff,	95% CI of diff,	Significant?	Summary		Bonferroni's multiple comparisons test			Mean Diff,	95% CI of diff,	Significant?	Summary
	Row 1								Row 4								Row 7
	WT +LNNA vs. WT+ LNNA+LNAME			0	-28,00 to 28,00	No	ns		WT +LNNA vs. WT+ LNNA+LNAME			-6.718	-34,72 to 21,28	No	ns		WT +LNNA vs. WT+ LNNA+LNAME			4.148	-23,85 to 32,15	No	ns
	WT +LNNA vs. WT +LNNA+INDO			0	-21,52 to 21,52	No	ns		WT +LNNA vs. WT +LNNA+INDO			-9.051	-30,57 to 12,47	No	ns		WT +LNNA vs. WT +LNNA+INDO			3.839	-17,69 to 25,36	No	ns
	WT +LNNA vs. WT + LNAME+INDO+MSPPOH			0	-21,52 to 21,52	No	ns		WT +LNNA vs. WT + LNAME+INDO+MSPPOH			-7.254	-28,78 to 14,27	No	ns		WT +LNNA vs. WT + LNAME+INDO+MSPPOH			2.305	-19,22 to 23,83	No	ns
	WT +LNNA vs. AF2° +LNAME+INDO			0	-17,40 to 17,40	No	ns		WT +LNNA vs. AF2° +LNAME+INDO			-2.588	-19,99 to 14,82	No	ns		WT +LNNA vs. AF2° +LNAME+INDO			3.32	-14,08 to 20,72	No	ns
	WT +LNNA vs. AF2° +LNNA+INDO+MSPPOH			0	-19,98 to 19,98	No	ns		WT +LNNA vs. AF2° +LNNA+INDO+MSPPOH			-7.446	-27,42 to 12,53	No	ns		WT +LNNA vs. AF2° +LNNA+INDO+MSPPOH			-1.549	-21,53 to 18,43	No	ns
	WT +LNNA vs. WT + LNNA+LNAME			0	-17,40 to 17,40	No	ns		WT +LNNA vs. WT + LNNA+LNAME			-21.51	-38,91 to -4,101	Yes	**		WT +LNNA vs. WT + LNNA+LNAME			-29.98	-47,38 to -12,57	Yes	****
	WT +LNNA vs. AF2°			0	-17,40 to 17,40	No	ns		WT +LNNA vs. AF2°			-19.97	-37,37 to -2,565	Yes	**		WT +LNNA vs. AF2°			-29.85	-47,26 to -12,45	Yes	****
	WT + LNNA+LNAME vs. WT +LNNA+INDO			0	-31,02 to 31,02	No	ns		WT + LNNA+LNAME vs. WT +LNNA+INDO			-2.333	-33,35 to 28,69	No	ns		WT + LNNA+LNAME vs. WT +LNNA+INDO			-0.3091	-31,33 to 30,71	No	ns
	WT + LNNA+LNAME vs. WT + LNAME+INDO+MSPPOH			0	-31,02 to 31,02	No	ns		WT + LNNA+LNAME vs. WT + LNAME+INDO+MSPPOH			-0.5367	-31,56 to 30,48	No	ns		WT + LNNA+LNAME vs. WT + LNAME+INDO+MSPPOH			-1.843	-32,86 to 29,18	No	ns
	WT + LNNA+LNAME vs. AF2° +LNAME+INDO			0	-28,32 to 28,32	No	ns		WT + LNNA+LNAME vs. AF2° +LNAME+INDO			4.13	-24,19 to 32,45	No	ns		WT + LNNA+LNAME vs. AF2° +LNAME+INDO			-0.8278	-29,14 to 27,49	No	ns
	WT + LNNA+LNAME vs. AF2° +LNNA+INDO+MSPPOH			0	-29,97 to 29,97	No	ns		WT + LNNA+LNAME vs. AF2° +LNNA+INDO+MSPPOH			-0.7283	-30,70 to 29,24	No	ns		WT + LNNA+LNAME vs. AF2° +LNNA+INDO+MSPPOH			-5.697	-35,66 to 24,27	No	ns
	WT + LNNA+LNAME vs. WT +LNNA+INDO			0	-28,32 to 28,32	No	ns		WT + LNNA+LNAME vs. WT +LNNA+INDO			-14.79	-43,10 to 13,53	No	ns		WT + LNNA+LNAME vs. WT +LNNA+INDO			-34.13	-62,44 to -5,808	Yes	**
	WT + LNNA+LNAME vs. AF2°			0	-28,32 to 28,32	No	ns		WT + LNNA+LNAME vs. AF2°			-13.25	-41,57 to 15,06	No	ns		WT + LNNA+LNAME vs. AF2°			-34	-62,32 to -5,685	Yes	**
	WT +LNNA+INDO vs. WT + LNAME+INDO+MSPPOH			0	-25,33 to 25,33	No	ns		WT +LNNA+INDO vs. WT + LNAME+INDO+MSPPOH			1.796	-23,53 to 27,12	No	ns		WT +LNNA+INDO vs. WT + LNAME+INDO+MSPPOH			-1.534	-26,86 to 23,79	No	ns
	WT +LNNA+INDO vs. AF2° +LNAME+INDO			0	-21,93 to 21,93	No	ns		WT +LNNA+INDO vs. AF2° +LNAME+INDO			6.463	-15,47 to 28,40	No	ns		WT +LNNA+INDO vs. AF2° +LNAME+INDO			-0.5187	-22,45 to 21,42	No	ns
	WT +LNNA+INDO vs. AF2° +LNNA+INDO+MSPPOH			0	-24,03 to 24,03	No	ns		WT +LNNA+INDO vs. AF2° +LNNA+INDO+MSPPOH			1.605	-22,42 to 25,63	No	ns		WT +LNNA+INDO vs. AF2° +LNNA+INDO+MSPPOH			-5.388	-29,42 to 18,64	No	ns
	WT +LNNA+INDO vs. WT			0	-21,93 to 21,93	No	ns		WT +LNNA+INDO vs. WT			-12.45	-34,39 to 9,479	No	ns		WT +LNNA+INDO vs. WT			-33.82	-55,75 to -11,88	Yes	****
	WT +LNNA+INDO vs. AF2°			0	-21,93 to 21,93	No	ns		WT +LNNA+INDO vs. AF2°			-10.92	-32,85 to 11,01	No	ns		WT +LNNA+INDO vs. AF2°			-33.69	-55,63 to -11,76	Yes	****
	WT+ LNAME+INDO+MSPPOH vs. AF2° +LNAME+INDO			0	-21,93 to 21,93	No	ns		WT+ LNAME+INDO+MSPPOH vs. AF2° +LNAME+INDO			4.667	-17,27 to 26,60	No	ns		WT+ LNAME+INDO+MSPPOH vs. AF2° +LNAME+INDO			1.015	-20,92 to 22,95	No	ns
	WT+ LNAME+INDO+MSPPOH vs. AF2° +LNNA+INDO+MSPPOH			0	-24,03 to 24,03	No	ns		WT+ LNAME+INDO+MSPPOH vs. AF2° +LNNA+INDO+MSPPOH			-0.1916	-24,22 to 23,84	No	ns		WT+ LNAME+INDO+MSPPOH vs. AF2° +LNNA+INDO+MSPPOH			-3.854	-27,88 to 20,17	No	ns
	WT + LNAME+INDO+MSPPOH vs. WT			0	-21,93 to 21,93	No	ns		WT + LNAME+INDO+MSPPOH vs. WT			-14.25	-36,19 to 7,683	No	ns		WT + LNAME+INDO+MSPPOH vs. WT			-32.28	-54,22 to -10,35	Yes	***
	WT+ LNAME+INDO+MSPPOH vs. AF2° +LNAME+INDO			0	-21,93 to 21,93	No	ns		WT+ LNAME+INDO+MSPPOH vs. AF2° +LNAME+INDO			-12.72	-34,65 to 9,219	No	ns		WT+ LNAME+INDO+MSPPOH vs. AF2° +LNAME+INDO			-32.16	-54,09 to -10,23	Yes	***
	AF2° +LNAME+INDO vs. AF2° +LNNA+INDO+MSPPOH			0	-20,42 to 20,42	No	ns		AF2° +LNAME+INDO vs. AF2° +LNNA+INDO+MSPPOH			-4.858	-25,28 to 15,56	No	ns		AF2° +LNAME+INDO vs. AF2° +LNNA+INDO+MSPPOH			-4.869	-25,29 to 15,55	No	ns
	AF2° +LNAME+INDO vs. WT			0	-17,91 to 17,91	No	ns		AF2° +LNAME+INDO vs. WT			-18.92	-36,83 to -1,009	Yes	*		AF2° +LNAME+INDO vs. WT			-33.3	-51,21 to -15,39	Yes	****
	AF2° +LNAME+INDO vs. AF2°			0	-17,91 to 17,91	No	ns		AF2° +LNAME+INDO vs. AF2°			-17.38	-35,29 to 0,5268	No	ns		AF2° +LNAME+INDO vs. AF2°			-33.17	-51,08 to -15,26	Yes	****
	AF2° +LNNA+INDO+MSPPOH vs. WT			0	-20,42 to 20,42	No	ns		AF2° +LNNA+INDO+MSPPOH vs. WT			-14.06	-34,48 to 6,360	No	ns		AF2° +LNNA+INDO+MSPPOH vs. WT			-28.43	-48,85 to -8,009	Yes	***
	AF2° +LNNA+INDO+MSPPOH vs. AF2			0	-20,42 to 20,42	No	ns		AF2° +LNNA+INDO+MSPPOH vs. AF2			-12.52	-32,94 to 7,896	No	ns		AF2° +LNNA+INDO+MSPPOH vs. AF2			-28.3	-48,72 to -7,885	Yes	***
	WT vs. AF2			0	-17,91 to 17,91	No	ns		WT vs. AF2			1.536	-16,37 to 19,44	No	ns		WT vs. AF2			0.1234	-17,79 to 18,03	No	ns
	Row 2								Row 5
	WT +LNNA vs. WT+ LNNA+LNAME			-4.774	-32,77 to 23,23	No	ns		WT +LNNA vs. WT+ LNNA+LNAME			-6.406	-34,41 to 21,59	No	ns
	WT +LNNA vs. WT +LNNA+INDO			-3.758	-25,28 to 17,77	No	ns		WT +LNNA vs. WT +LNNA+INDO			0.3545	-21,17 to 21,88	No	ns
	WT +LNNA vs. WT + LNAME+INDO+MSPPOH			-3.134	-24,66 to 18,39	No	ns		WT +LNNA vs. WT + LNAME+INDO+MSPPOH			-4.737	-26,26 to 16,79	No	ns
	WT +LNNA vs. AF2° +LNAME+INDO			-0.8122	-18,22 to 16,59	No	ns		WT +LNNA vs. AF2° +LNAME+INDO			-0.004125	-17,41 to 17,40	No	ns
	WT +LNNA vs. AF2° +LNNA+INDO+MSPPOH			-2.575	-22,55 to 17,40	No	ns		WT +LNNA vs. AF2° +LNNA+INDO+MSPPOH			-3.929	-23,91 to 16,05	No	ns
	WT +LNNA vs. WT + LNNA+LNAME			-7.991	-25,40 to 9,413	No	ns		WT +LNNA vs. WT + LNNA+LNAME			-28.07	-45,47 to -10,66	Yes	****
	WT +LNNA vs. AF2°			-6.541	-23,95 to 10,86	No	ns		WT +LNNA vs. AF2°			-26.43	-43,83 to -9,022	Yes	****
	WT + LNNA+LNAME vs. WT +LNNA+INDO			1.016	-30,00 to 32,04	No	ns		WT + LNNA+LNAME vs. WT +LNNA+INDO			6.76	-24,26 to 37,78	No	ns
	WT + LNNA+LNAME vs. WT + LNAME+INDO+MSPPOH			1.64	-29,38 to 32,66	No	ns		WT + LNNA+LNAME vs. WT + LNAME+INDO+MSPPOH			1.668	-29,35 to 32,69	No	ns
	WT + LNNA+LNAME vs. AF2° +LNAME+INDO			3.962	-24,35 to 32,28	No	ns		WT + LNNA+LNAME vs. AF2° +LNAME+INDO			6.402	-21,92 to 34,72	No	ns
	WT + LNNA+LNAME vs. AF2° +LNNA+INDO+MSPPOH			2.199	-27,77 to 32,17	No	ns		WT + LNNA+LNAME vs. AF2° +LNNA+INDO+MSPPOH			2.477	-27,49 to 32,44	No	ns
	WT + LNNA+LNAME vs. WT +LNNA+INDO			-3.217	-31,53 to 25,10	No	ns		WT + LNNA+LNAME vs. WT +LNNA+INDO			-21.66	-49,98 to 6,655	No	ns
	WT + LNNA+LNAME vs. AF2°			-1.767	-30,08 to 26,55	No	ns		WT + LNNA+LNAME vs. AF2°			-20.02	-48,34 to 8,296	No	ns
	WT +LNNA+INDO vs. WT + LNAME+INDO+MSPPOH			0.6234	-24,70 to 25,95	No	ns		WT +LNNA+INDO vs. WT + LNAME+INDO+MSPPOH			-5.092	-30,42 to 20,24	No	ns
	WT +LNNA+INDO vs. AF2° +LNAME+INDO			2.946	-18,99 to 24,88	No	ns		WT +LNNA+INDO vs. AF2° +LNAME+INDO			-0.3586	-22,29 to 21,58	No	ns
	WT +LNNA+INDO vs. AF2° +LNNA+INDO+MSPPOH			1.183	-22,85 to 25,21	No	ns		WT +LNNA+INDO vs. AF2° +LNNA+INDO+MSPPOH			-4.284	-28,31 to 19,74	No	ns
	WT +LNNA+INDO vs. WT			-4.234	-26,17 to 17,70	No	ns		WT +LNNA+INDO vs. WT			-28.42	-50,36 to -6,488	Yes	**
	WT +LNNA+INDO vs. AF2°			-2.784	-24,72 to 19,15	No	ns		WT +LNNA+INDO vs. AF2°			-26.78	-48,72 to -4,847	Yes	**
	WT+ LNAME+INDO+MSPPOH vs. AF2° +LNAME+INDO			2.322	-19,61 to 24,26	No	ns		WT+ LNAME+INDO+MSPPOH vs. AF2° +LNAME+INDO			4.733	-17,20 to 26,67	No	ns
	WT+ LNAME+INDO+MSPPOH vs. AF2° +LNNA+INDO+MSPPOH			0.5591	-23,47 to 24,59	No	ns		WT+ LNAME+INDO+MSPPOH vs. AF2° +LNNA+INDO+MSPPOH			0.8082	-23,22 to 24,84	No	ns
	WT + LNAME+INDO+MSPPOH vs. WT			-4.857	-26,79 to 17,08	No	ns		WT + LNAME+INDO+MSPPOH vs. WT			-23.33	-45,26 to -1,396	Yes	*
	WT+ LNAME+INDO+MSPPOH vs. AF2° +LNAME+INDO			-3.407	-25,34 to 18,53	No	ns		WT+ LNAME+INDO+MSPPOH vs. AF2° +LNAME+INDO			-21.69	-43,62 to 0,2449	No	ns
	AF2° +LNAME+INDO vs. AF2° +LNNA+INDO+MSPPOH			-1.763	-22,18 to 18,66	No	ns		AF2° +LNAME+INDO vs. AF2° +LNNA+INDO+MSPPOH			-3.925	-24,34 to 16,49	No	ns
	AF2° +LNAME+INDO vs. WT			-7.179	-25,09 to 10,73	No	ns		AF2° +LNAME+INDO vs. WT			-28.06	-45,97 to -10,15	Yes	****
	AF2° +LNAME+INDO vs. AF2°			-5.729	-23,64 to 12,18	No	ns		AF2° +LNAME+INDO vs. AF2°			-26.42	-44,33 to -8,513	Yes	***
	AF2° +LNNA+INDO+MSPPOH vs. WT			-5.416	-25,84 to 15,00	No	ns		AF2° +LNNA+INDO+MSPPOH vs. WT			-24.14	-44,56 to -3,719	Yes	**
	AF2° +LNNA+INDO+MSPPOH vs. AF2			-3.966	-24,39 to 16,45	No	ns		AF2° +LNNA+INDO+MSPPOH vs. AF2			-22.5	-42,92 to -2,078	Yes	*
	WT vs. AF2			1.45	-16,46 to 19,36	No	ns		WT vs. AF2			1.641	-16,27 to 19,55	No	ns
	Row 3								Row 6
	WT +LNNA vs. WT+ LNNA+LNAME			-7.569	-35,57 to 20,43	No	ns		WT +LNNA vs. WT+ LNNA+LNAME			-6.381	-34,38 to 21,62	No	ns
	WT +LNNA vs. WT +LNNA+INDO			-6.788	-28,31 to 14,74	No	ns		WT +LNNA vs. WT +LNNA+INDO			-0.1622	-21,69 to 21,36	No	ns
	WT +LNNA vs. WT + LNAME+INDO+MSPPOH			-4.73	-26,25 to 16,79	No	ns		WT +LNNA vs. WT + LNAME+INDO+MSPPOH			-4.504	-26,03 to 17,02	No	ns
	WT +LNNA vs. AF2° +LNAME+INDO			-2.249	-19,65 to 15,16	No	ns		WT +LNNA vs. AF2° +LNAME+INDO			1.362	-16,04 to 18,77	No	ns
	WT +LNNA vs. AF2° +LNNA+INDO+MSPPOH			-5.619	-25,60 to 14,36	No	ns		WT +LNNA vs. AF2° +LNNA+INDO+MSPPOH			-2.592	-22,57 to 17,39	No	ns
	WT +LNNA vs. WT + LNNA+LNAME			-12.55	-29,96 to 4,852	No	ns		WT +LNNA vs. WT + LNNA+LNAME			-36.37	-53,77 to -18,96	Yes	****
	WT +LNNA vs. AF2°			-11.72	-29,13 to 5,680	No	ns		WT +LNNA vs. AF2°			-35.94	-53,35 to -18,54	Yes	****
	WT + LNNA+LNAME vs. WT +LNNA+INDO			0.7811	-30,24 to 31,80	No	ns		WT + LNNA+LNAME vs. WT +LNNA+INDO			6.218	-24,80 to 37,24	No	ns
	WT + LNNA+LNAME vs. WT + LNAME+INDO+MSPPOH			2.839	-28,18 to 33,86	No	ns		WT + LNNA+LNAME vs. WT + LNAME+INDO+MSPPOH			1.876	-29,14 to 32,90	No	ns
	WT + LNNA+LNAME vs. AF2° +LNAME+INDO			5.32	-23,00 to 33,64	No	ns		WT + LNNA+LNAME vs. AF2° +LNAME+INDO			7.743	-20,57 to 36,06	No	ns
	WT + LNNA+LNAME vs. AF2° +LNNA+INDO+MSPPOH			1.95	-28,02 to 31,92	No	ns		WT + LNNA+LNAME vs. AF2° +LNNA+INDO+MSPPOH			3.789	-26,18 to 33,76	No	ns
	WT + LNNA+LNAME vs. WT +LNNA+INDO			-4.984	-33,30 to 23,33	No	ns		WT + LNNA+LNAME vs. WT +LNNA+INDO			-29.99	-58,31 to -1,672	Yes	*
	WT + LNNA+LNAME vs. AF2°			-4.156	-32,47 to 24,16	No	ns		WT + LNNA+LNAME vs. AF2°			-29.56	-57,88 to -1,246	Yes	*
	WT +LNNA+INDO vs. WT + LNAME+INDO+MSPPOH			2.058	-23,27 to 27,39	No	ns		WT +LNNA+INDO vs. WT + LNAME+INDO+MSPPOH			-4.342	-29,67 to 20,99	No	ns
	WT +LNNA+INDO vs. AF2° +LNAME+INDO			4.539	-17,39 to 26,47	No	ns		WT +LNNA+INDO vs. AF2° +LNAME+INDO			1.525	-20,41 to 23,46	No	ns
	WT +LNNA+INDO vs. AF2° +LNNA+INDO+MSPPOH			1.169	-22,86 to 25,20	No	ns		WT +LNNA+INDO vs. AF2° +LNNA+INDO+MSPPOH			-2.43	-26,46 to 21,60	No	ns
	WT +LNNA+INDO vs. WT			-5.765	-27,70 to 16,17	No	ns		WT +LNNA+INDO vs. WT			-36.21	-58,14 to -14,27	Yes	****
	WT +LNNA+INDO vs. AF2°			-4.937	-26,87 to 17,00	No	ns		WT +LNNA+INDO vs. AF2°			-35.78	-57,72 to -13,85	Yes	****
	WT+ LNAME+INDO+MSPPOH vs. AF2° +LNAME+INDO			2.481	-19,45 to 24,42	No	ns		WT+ LNAME+INDO+MSPPOH vs. AF2° +LNAME+INDO			5.866	-16,07 to 27,80	No	ns
	WT+ LNAME+INDO+MSPPOH vs. AF2° +LNNA+INDO+MSPPOH			-0.8892	-24,92 to 23,14	No	ns		WT+ LNAME+INDO+MSPPOH vs. AF2° +LNNA+INDO+MSPPOH			1.912	-22,12 to 25,94	No	ns
	WT + LNAME+INDO+MSPPOH vs. WT			-7.823	-29,76 to 14,11	No	ns		WT + LNAME+INDO+MSPPOH vs. WT			-31.87	-53,80 to -9,931	Yes	***
	WT+ LNAME+INDO+MSPPOH vs. AF2° +LNAME+INDO			-6.995	-28,93 to 14,94	No	ns		WT+ LNAME+INDO+MSPPOH vs. AF2° +LNAME+INDO			-31.44	-53,37 to -9,505	Yes	***
	AF2° +LNAME+INDO vs. AF2° +LNNA+INDO+MSPPOH			-3.37	-23,79 to 17,05	No	ns		AF2° +LNAME+INDO vs. AF2° +LNNA+INDO+MSPPOH			-3.954	-24,37 to 16,47	No	ns
	AF2° +LNAME+INDO vs. WT			-10.3	-28,21 to 7,605	No	ns		AF2° +LNAME+INDO vs. WT			-37.73	-55,64 to -19,82	Yes	****
	AF2° +LNAME+INDO vs. AF2°			-9.476	-27,39 to 8,433	No	ns		AF2° +LNAME+INDO vs. AF2°			-37.31	-55,22 to -19,40	Yes	****
	AF2° +LNNA+INDO+MSPPOH vs. WT			-6.934	-27,35 to 13,49	No	ns		AF2° +LNNA+INDO+MSPPOH vs. WT			-33.78	-54,20 to -13,36	Yes	****
	AF2° +LNNA+INDO+MSPPOH vs. AF2			-6.106	-26,53 to 14,31	No	ns		AF2° +LNNA+INDO+MSPPOH vs. AF2			-33.35	-53,77 to -12,93	Yes	****
	WT vs. AF2			0.8285	-17,08 to 18,74	No	ns		WT vs. AF2			0.4257	-17,48 to 18,33	No	ns
