# Supplementary material for: Membrane estrogen receptor alpha (ERα) participates in flow-mediated dilation in a ligand-independent manner
Source: eLife journal article supplement (doi:10.7554/elife.68695), 2021-11-29
Supplement: supp [file elife-68695-supp-v1.zip › elife_poa_e68695_Figure_5_source_data_1.pdf]

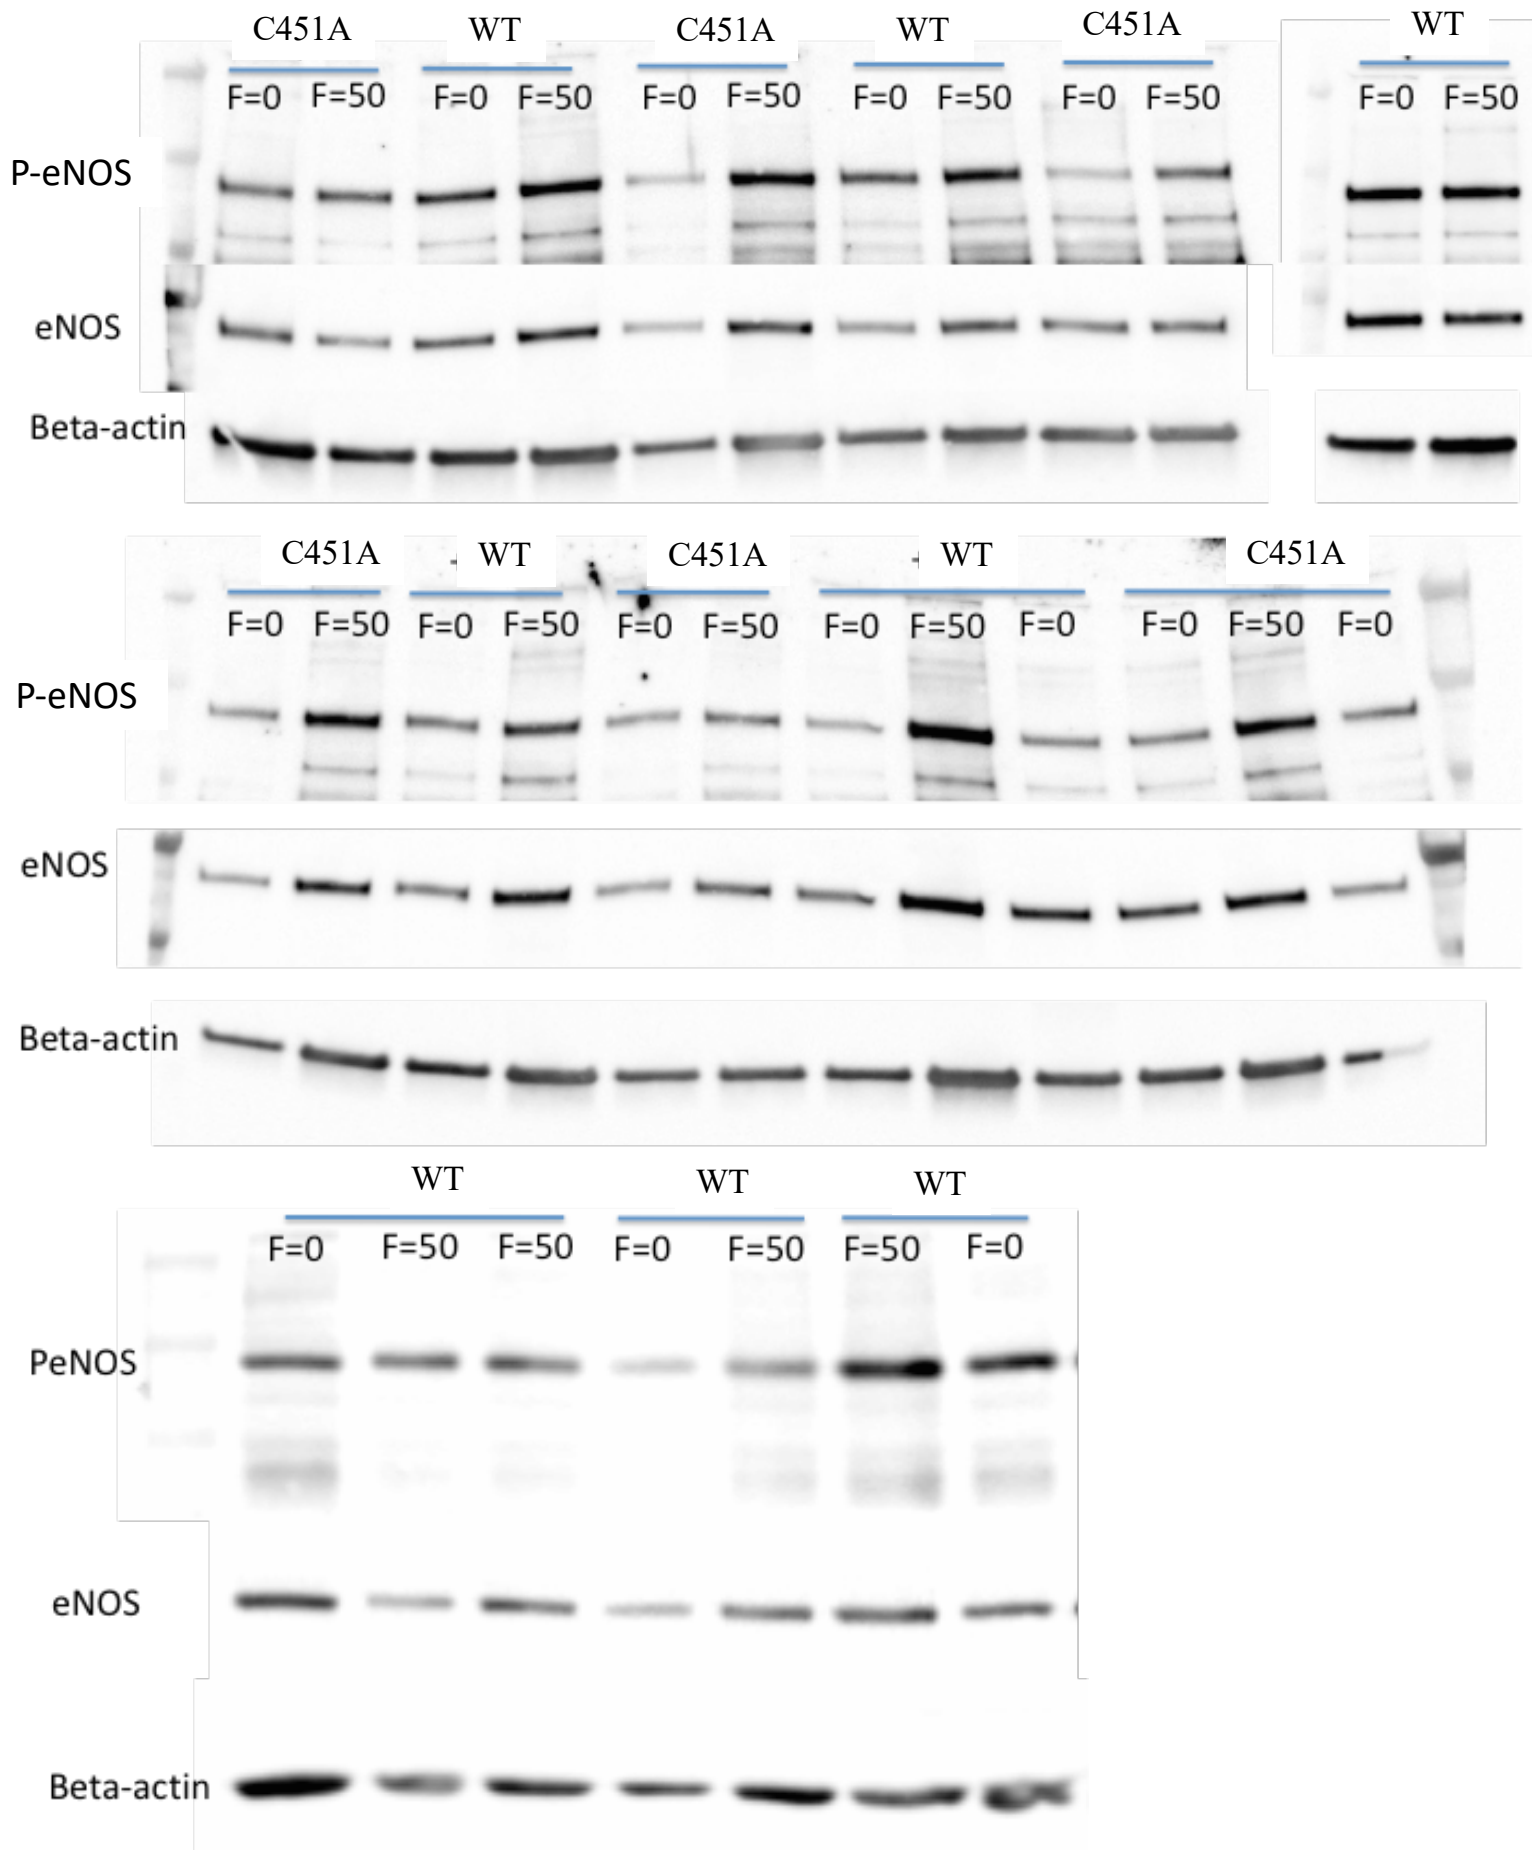

**Figure 5: source data 2:** Full blots for eNOS, P-eNOS, and beta-actin measured in mesenteric arteries that had been submitted to flow (50  $\mu$ L/min, F=50) or not (F=0). The arteries were isolated from C451A-ER $\alpha$  (C451A) male mice and their littermate controls (WT).

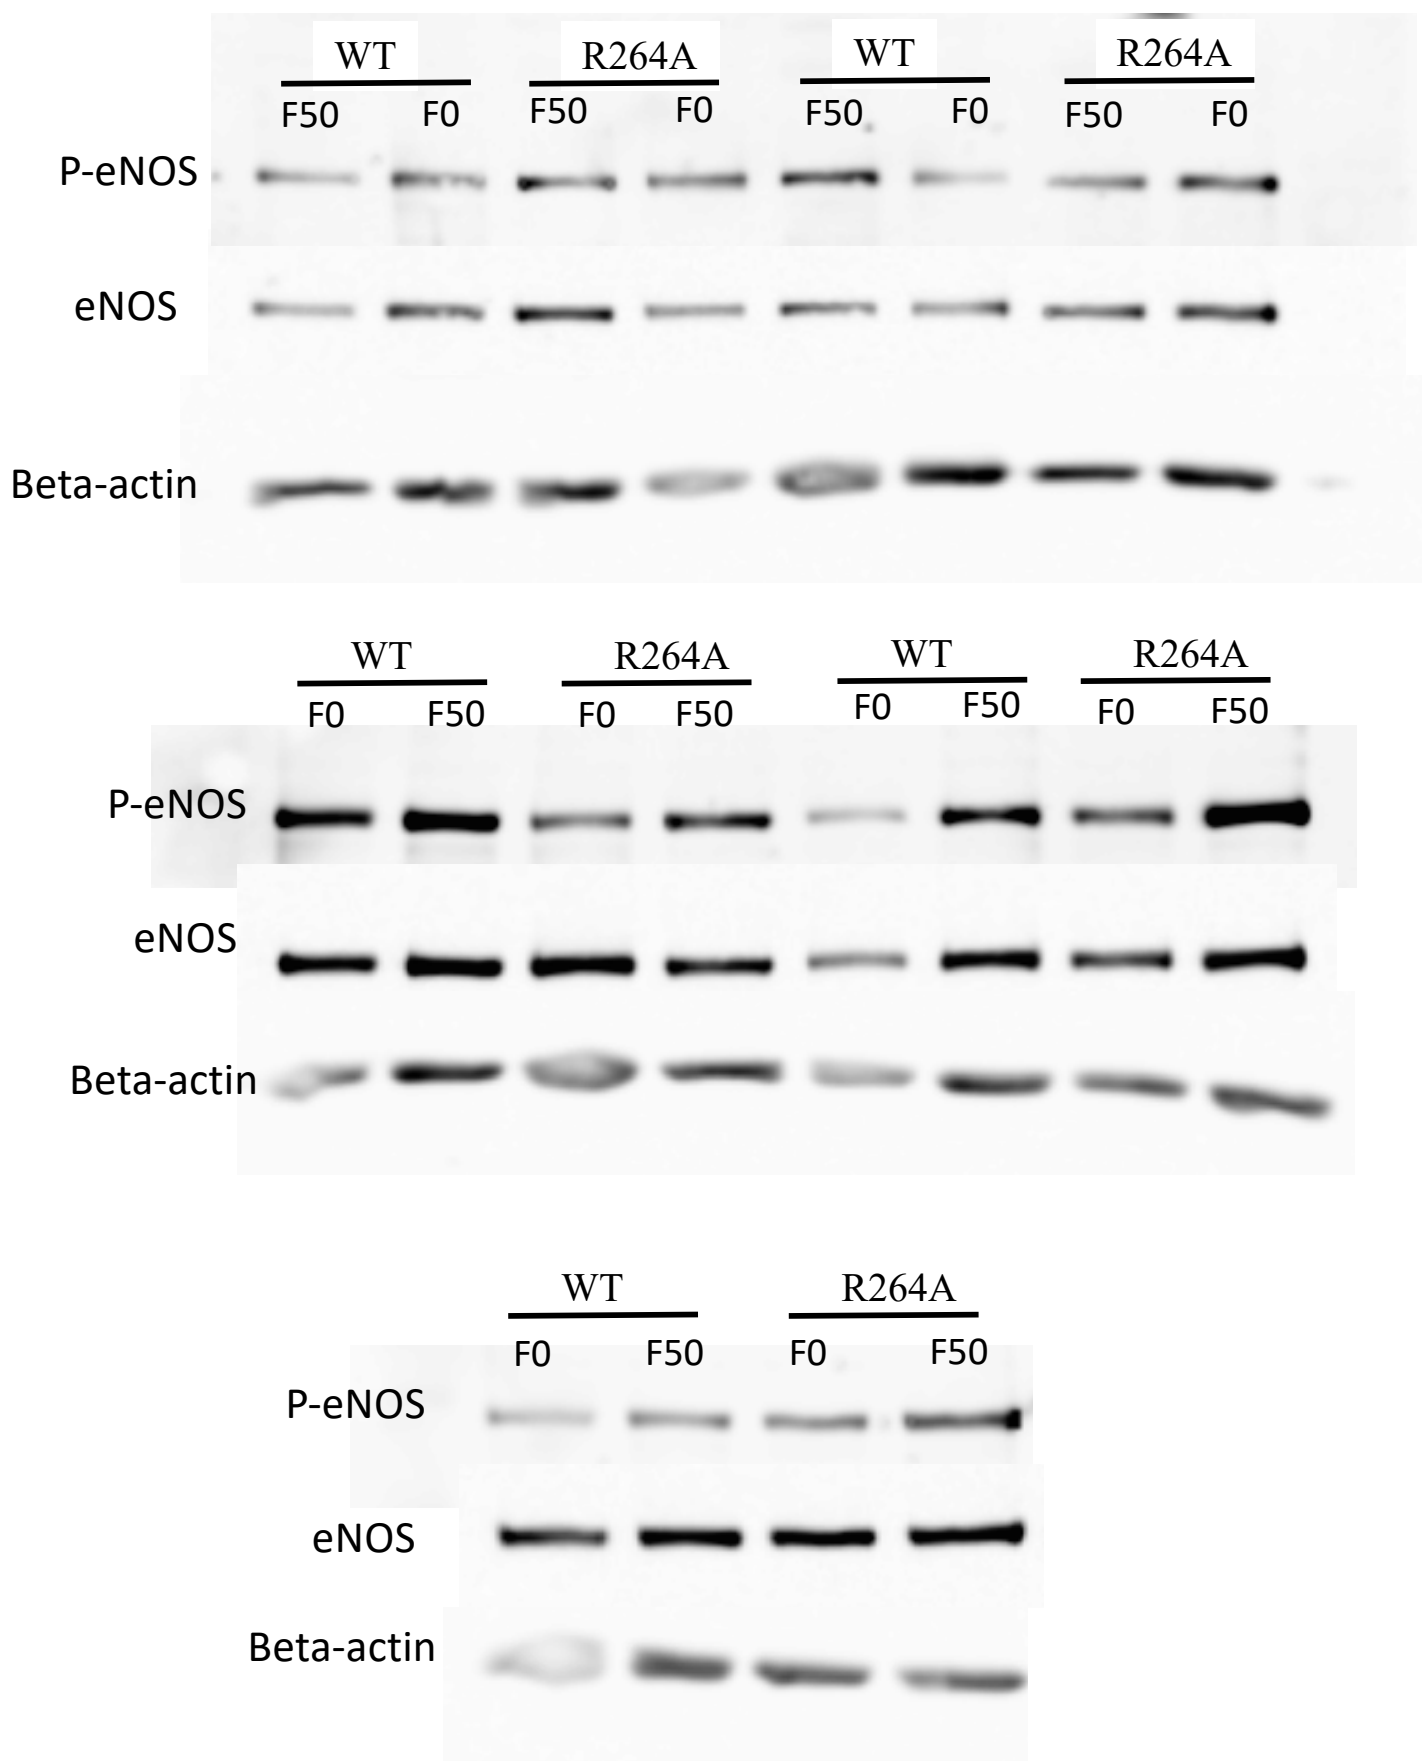

**Figure 5: source data 2:** Full blots for eNOS, P-eNOS, and beta-actin measured in mesenteric arteries that had been submitted to flow (50  $\mu$ L/min, F=50) or not (F=0). The arteries were isolated from R264A-ER $\alpha$  (R264A) male mice and their littermate controls (WT).

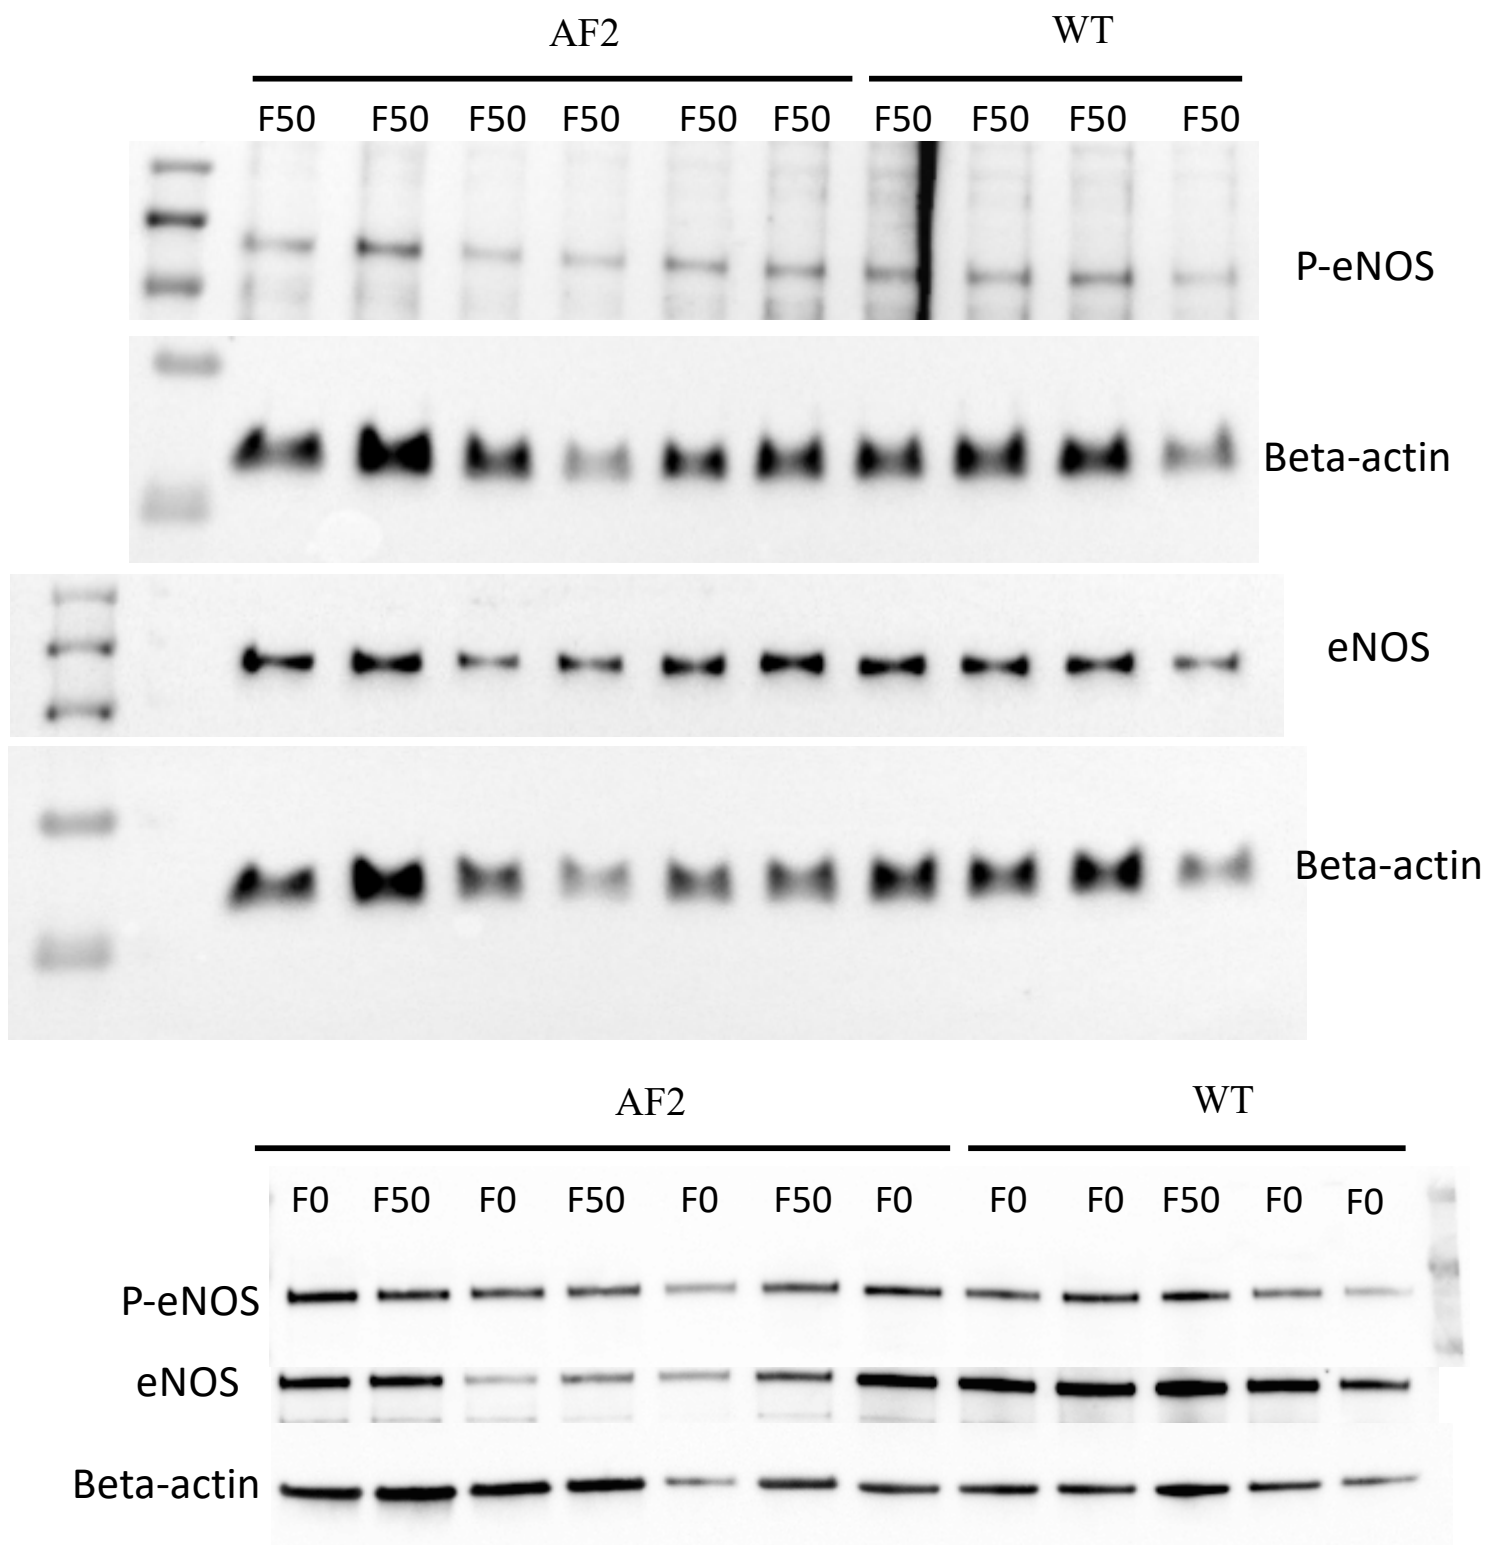

**Figure 5: source data 2 :** Full blots for eNOS, P-eNOS, and beta-actin measured in mesenteric arteries that had been submitted to flow (50  $\mu$ L/min, F=50) or not (F=0). The arteries were isolated from AF2-ER $\alpha$  (AF2) male mice and their littermate controls (WT).

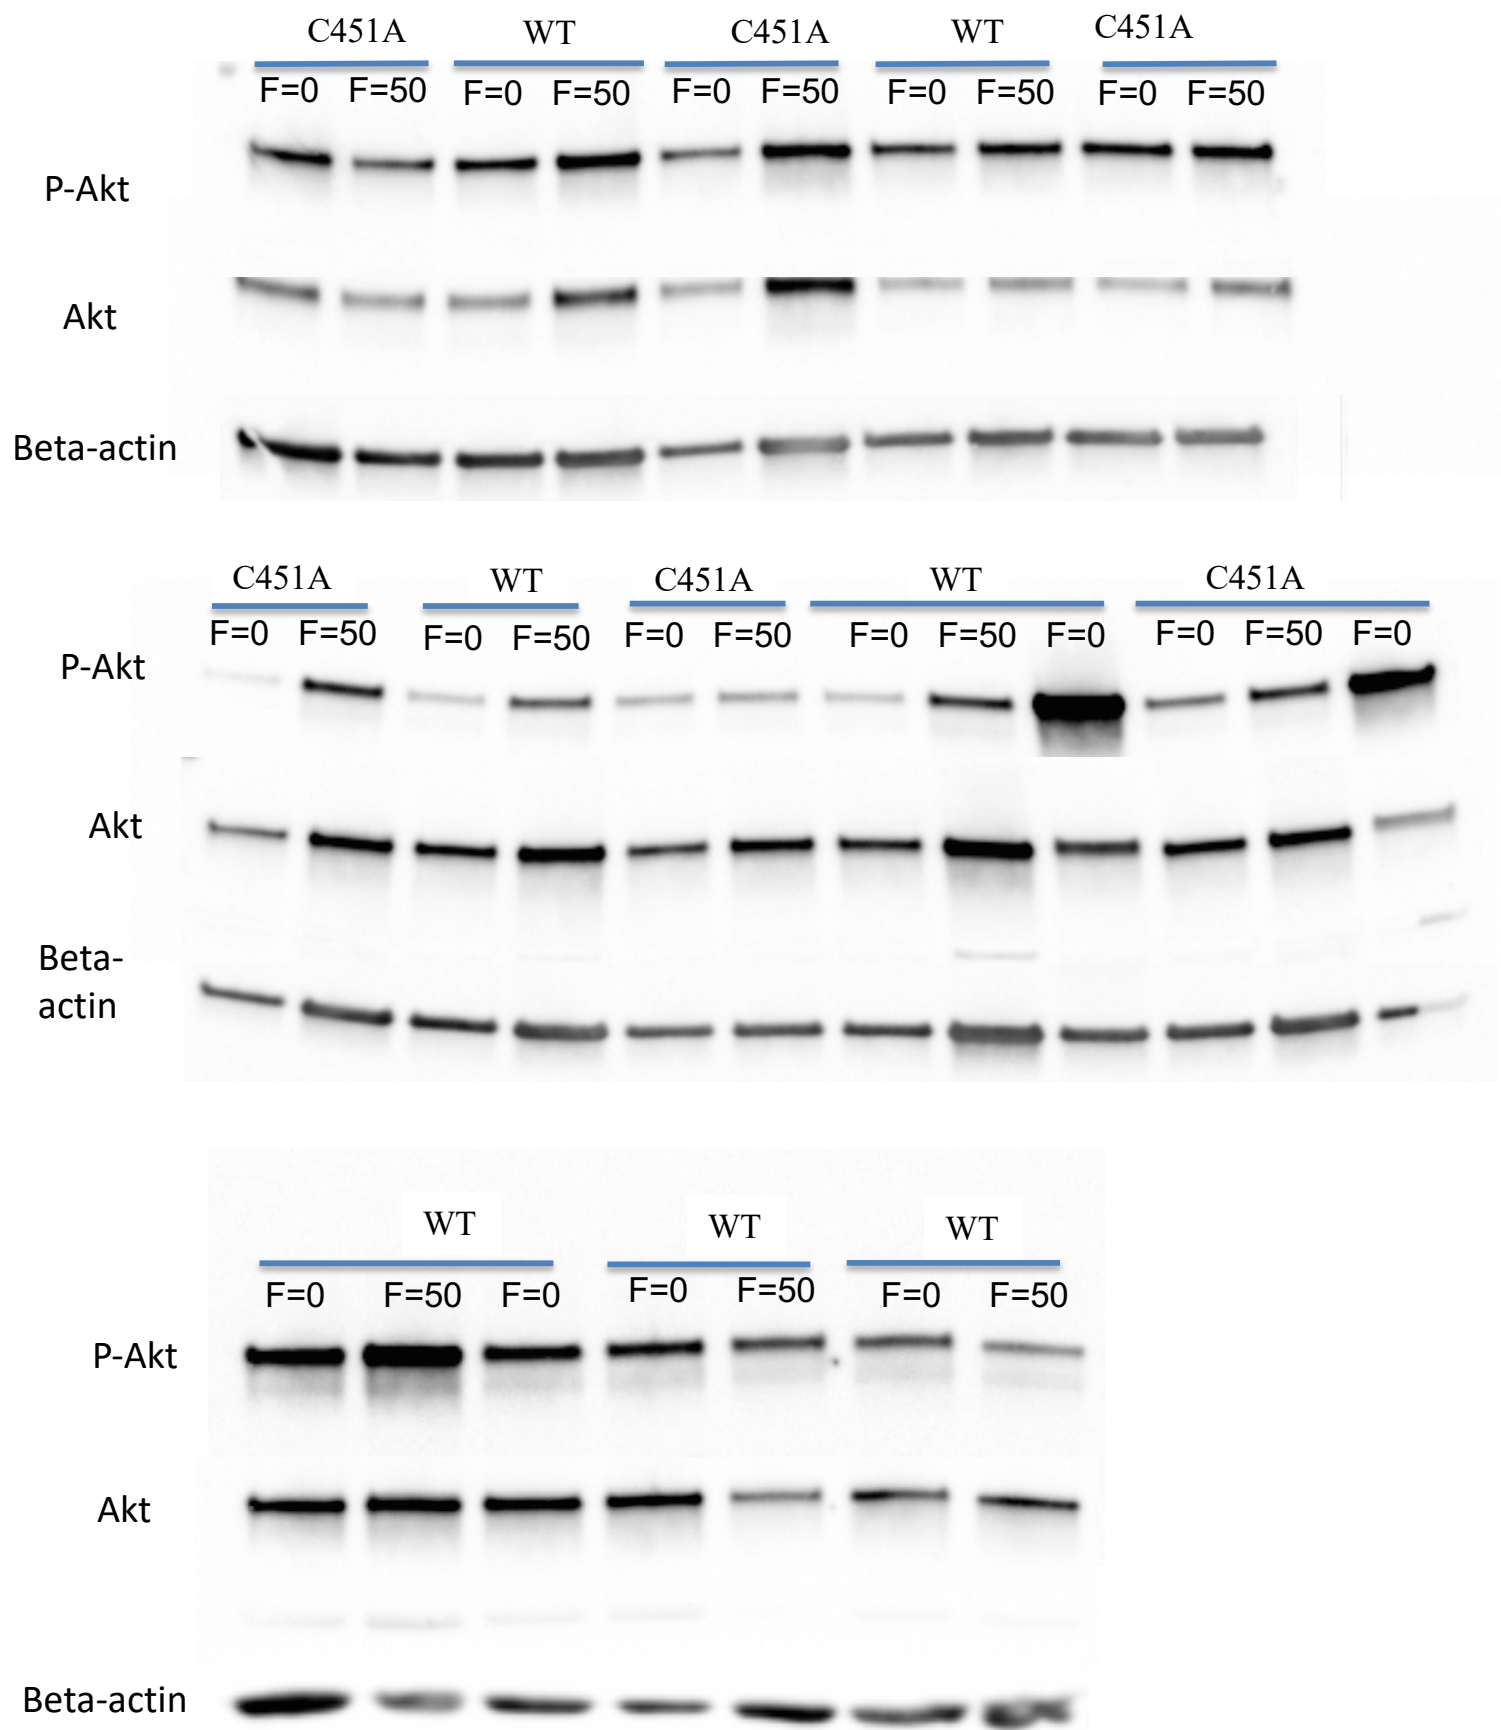

**Figure 5: source data 2 :** Full blots for Akt, P-Akt, and beta-actin measured in mesenteric arteries that had been submitted to flow (50  $\mu$ L/min, F=50) or not (F=0). The arteries were isolated from C451A-ER $\alpha$  (C451A) male mice and their littermate controls (WT). Beta-actin similar to eNOS and p-eNOS.

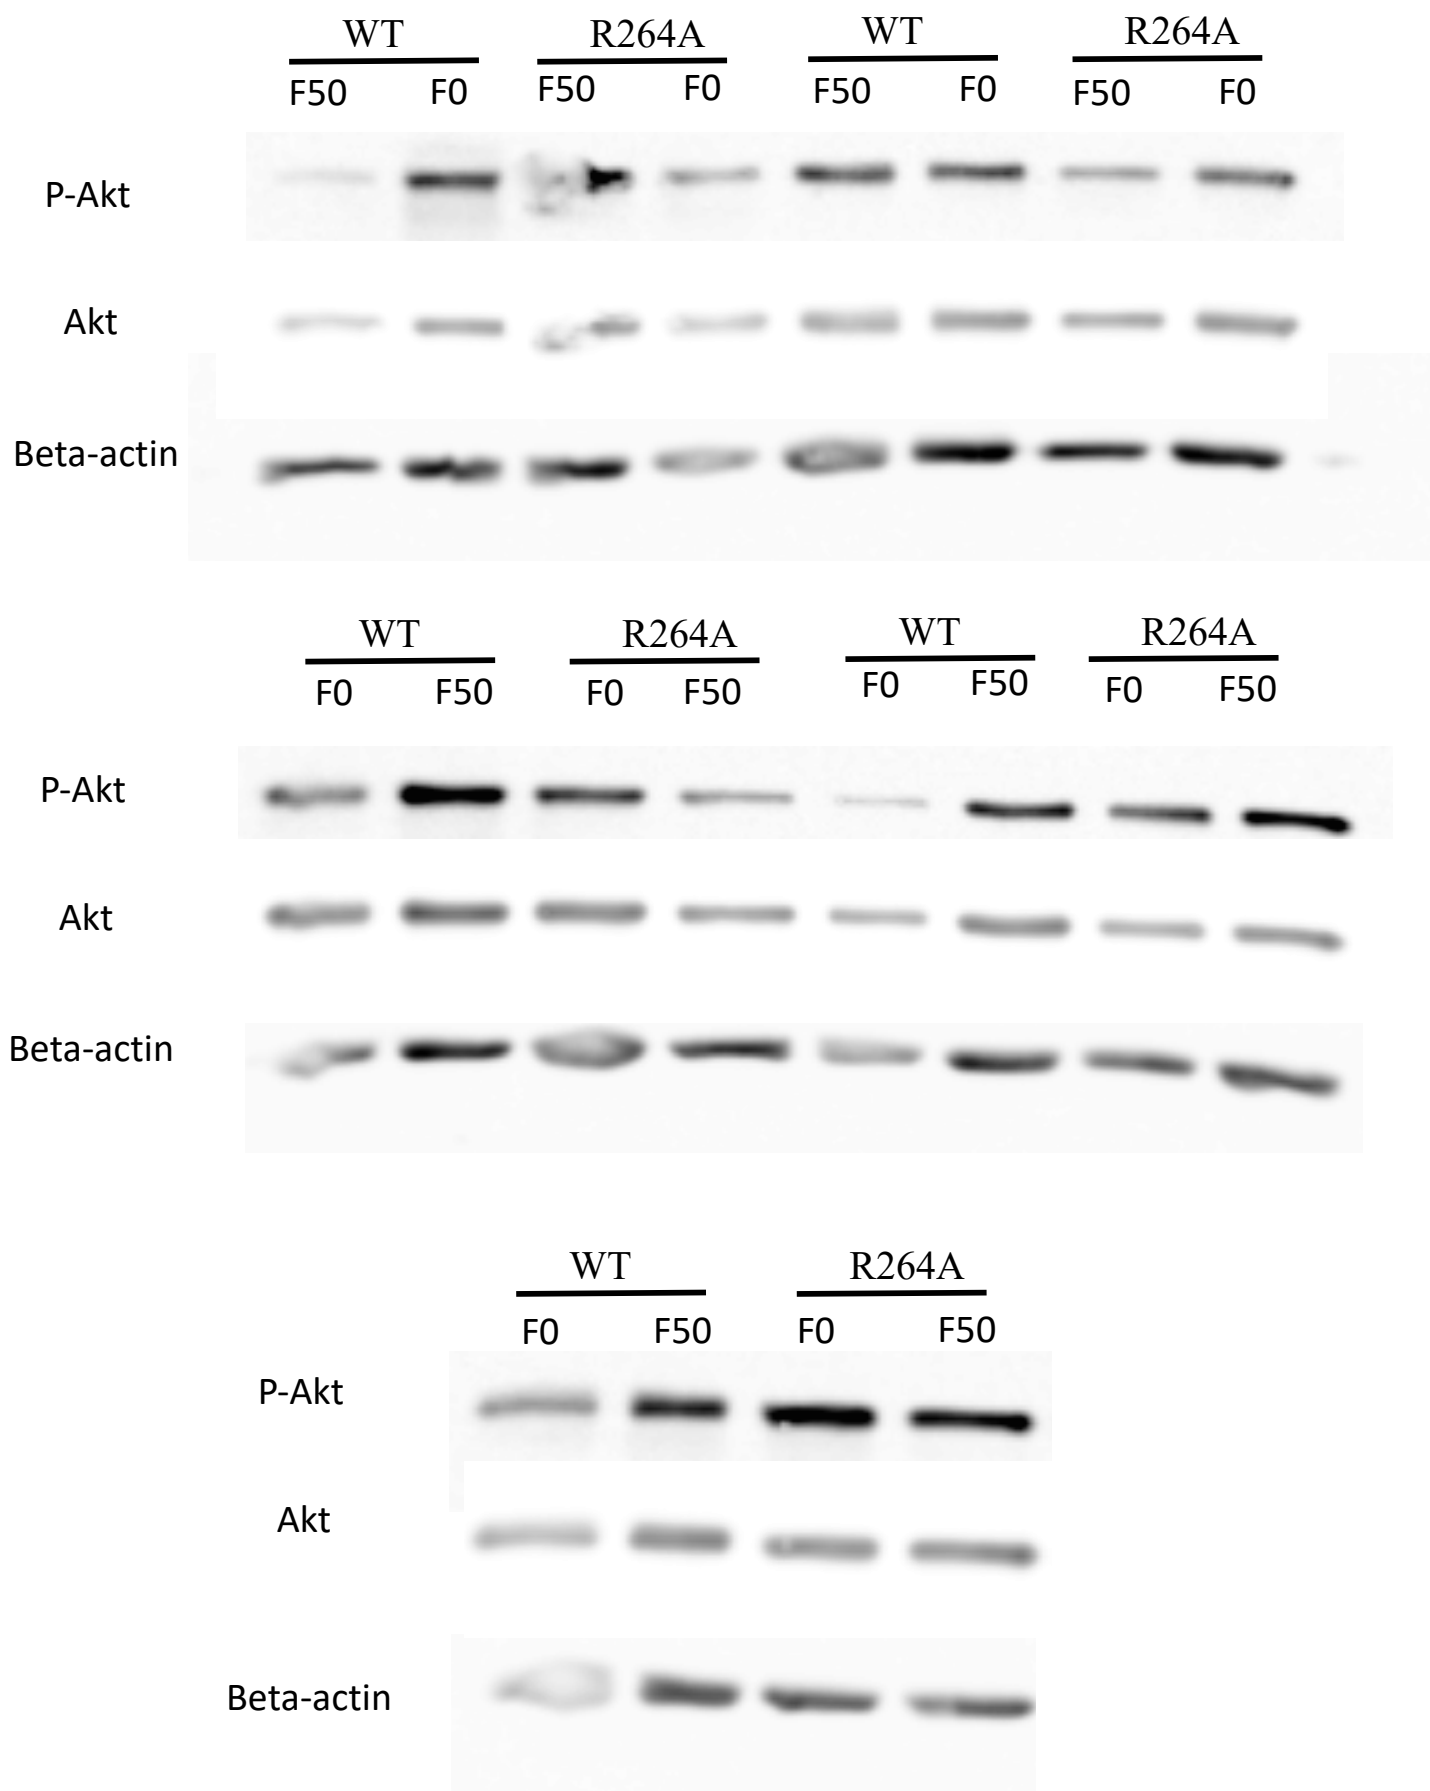

**Figure 5: source data 2 :** Full blots for Akt, P-Akt, and beta-actin measured in mesenteric arteries that had been submitted to flow (50  $\mu$ L/min, F=50) or not (F=0). The arteries were isolated from R264A-ER $\alpha$  (R264A) male mice and their littermate controls (WT). Beta-actin similar to eNOS and p-eNOS.

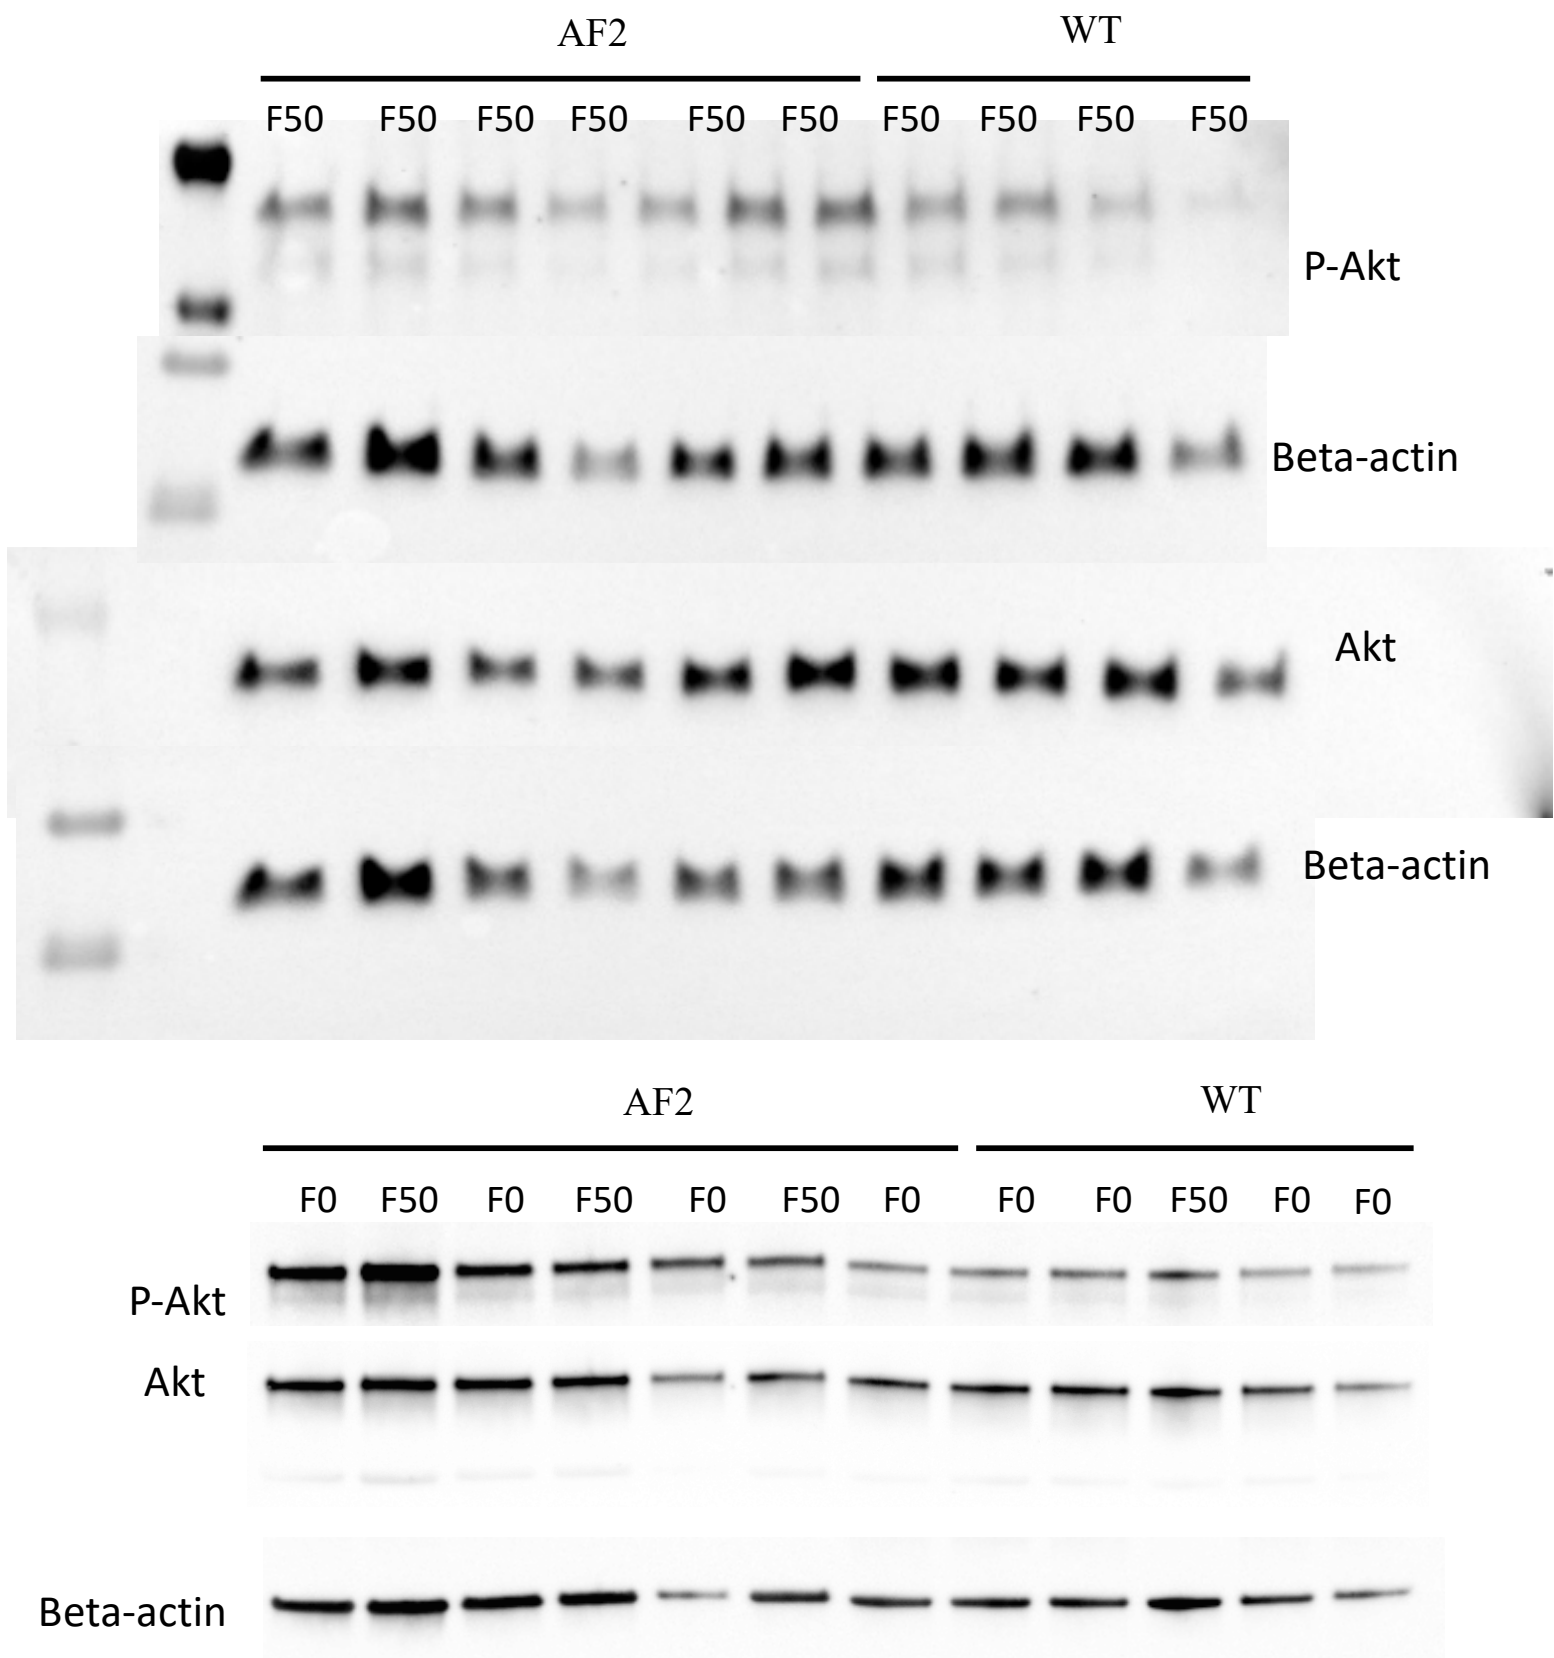

**Figure 5: source data 2 :** Full blots for Akt, P-Akt, and beta-actin measured in mesenteric arteries that had been submitted to flow (50  $\mu$ L/min, F=50) or not (F=0). The arteries were isolated from AF2-ER $\alpha$  (AF2) male mice and their littermate controls (WT). Beta-actin similar to eNOS and p-eNOS.
