# Supplementary material for: Membrane estrogen receptor alpha (ERα) participates in flow-mediated dilation in a ligand-independent manner
Source: eLife journal article supplement (doi:10.7554/elife.68695), 2021-11-29
Supplement: supp [file elife-68695-supp-v1.zip › elife_poa_e68695_Figure_5_source_data_1.xlsx]

## Sheet: Feuil1
	Data and statistical analysis from experiments plotted in Figure 5A to I
	Figure 5 A						Figure 5 B				Figure 5 C
	Flow -	flow -	Flow +	flow +							Flow -	flow -	Flow +	flow +
	WT	C451A-ERα	WT	C451A-ERα			WT	C451A-ERα			WT	C451A-ERα	WT	C451A-ERα
	0.92	0.8	1.1	1.02			0.323	0.395			0.221	0.28	0.52	0.436
	0.62	0.76	2.09	1.48			0.33	0.641			0.259	0.116	0.301	0.159
	0.44	0.44	2.11	0.88			0.406	0.673			0.119	0.192	0.497	0.12309
	1.12	0.98	2.12	1.18			0.63	0.672			0.153	0.071	0.383	0.1565
	1.07	0.83	1.82	0.67			0.583	0.654			0.26	0.26	0.42	0.214
	0.456	0.56	1.51	1.08			0.726	0.895			0.19	0.383		0.313
	0.45		1.4				0.99
	0.83		0.77
	0.42		2.09
	Kruskal-Wallis							Mann-Withney			Kruskal-Wallis
	Dunn's multiple comparisons test	Mean rank diff,	Significant?	Summary	Adjusted P Value			Column B	C451A		Dunn's multiple comparisons test	Mean rank diff,	Significant?	Summary	Adjusted P Value
	WT-F0 vs. C451A F0	0.05556	No	ns	>0,9999			vs.	vs,		WT-F0 vs. C451A F0	-1.083	No	ns	>0,9999
	WT-F0 vs. WT F50	-14.67	Yes	**	0.0045			Column A	WT		WT-F0 vs. WT F50	-11.15	Yes	*	0.0374
	WT-F0 vs. C451A F50	-7.778	No	ns	0.5614						WT-F0 vs. C451A F50	-2.083	No	ns	>0,9999
	C451A F0 vs. WT F50	-14.72	Yes	**	0.009			Mann Whitney test			C451A F0 vs. WT F50	-10.07	No	ns	0.0852
	C451A F0 vs. C451A F50	-7.833	No	ns	0.7389			P value	0.366		C451A F0 vs. C451A F50	-1	No	ns	>0,9999
	WT F50 vs. C451A F50	6.889	No	ns	0.8249			Exact or approximate P value?	Exact		WT F50 vs. C451A F50	9.067	No	ns	0.1631
								P value summary	ns
	Test details	Mean rank 1	Mean rank 2	Mean rank diff,	n1			Significantly different (P < 0.05)?	No		Test details	Mean rank 1	Mean rank 2	Mean rank diff,	n1
	WT-F0 vs. C451A F0	9.556	9.5	0.05556	9			One- or two-tailed P value?	Two-tailed		WT-F0 vs. C451A F0	8.75	9.833	-1.083	6
	WT-F0 vs. WT F50	9.556	24.22	-14.67	9			Sum of ranks in column A,B	42 , 49		WT-F0 vs. WT F50	8.75	19.9	-11.15	6
	WT-F0 vs. C451A F50	9.556	17.33	-7.778	9			Mann-Whitney U	14		WT-F0 vs. C451A F50	8.75	10.83	-2.083	6
	C451A F0 vs. WT F50	9.5	24.22	-14.72	6						C451A F0 vs. WT F50	9.833	19.9	-10.07	6
	C451A F0 vs. C451A F50	9.5	17.33	-7.833	6			Difference between medians			C451A F0 vs. C451A F50	9.833	10.83	-1	6
	WT F50 vs. C451A F50	24.22	17.33	6.889	9			Median of column A	0,5830, n=7		WT F50 vs. C451A F50	19.9	10.83	9.067	5
								Median of column B	0,6630, n=6
								Difference: Actual	0.08
								Difference: Hodges-Lehmann	0.0715
	Figure 5 D						Figure 5 E				Figure 5 F
	Flow -	flow +	Flow -	flow +							Flow -	flow +	Flow -	flow +
	WT	R264A-ERα	WT	R264A-ERα			WT	C451A-ERα			WT	R264A-ERα	WT	R264A-ERα
	0.856	1.985	1.241	2.015			0.154	0.107			0.2085	0.689	0.124	0.24
	1.865	2.996	1.841	2.11			0.186	0.17			0.248	0.758	0.214	0.324
	1.8861	3.122	1.897	2.015			0.117	0.127			0.3154	0.629	0.324	0.394
	1.954	3.451	1.992	2.453			0.156	0.203			0.401	0.881	0.4016	0.421
	2.089	3.784	2.456	3.391							0.421012	0.987	0.624	0.841
	Kruskal-Wallis							Mann-Withney			Kruskal-Wallis
	Dunn's multiple comparisons test	Mean rank diff,	Significant?	Summary	Adjusted P Value			Column E	R264A		Dunn's multiple comparisons test	Mean rank diff,	Significant?	Summary	Adjusted P Value
	WT-F0 vs. WT F50	-10.2	Yes	*	0.015			vs.	vs,		WT-F0 vs. WT F50	-10.2	Yes	*	0.0177
	WT-F0 vs. R264A F0	-1.2	No	ns	>0,9999			Column D	WT		WT-F0 vs. R264A F0	-0.1	No	ns	>0,9999
	WT-F0 vs. R264A F50	-7.4	No	ns	0.2872						WT-F0 vs. R264A F50	-2.9	No	ns	>0,9999
	WT F50 vs. R264A F0	9	No	ns	0.0967			Mann Whitney test			WT F50 vs. R264A F0	10.1	Yes	*	0.0416
	WT F50 vs. R264A F50	2.8	No	ns	>0,9999			P value	>0,9999		WT F50 vs. R264A F50	7.3	No	ns	0.3058
	R264A F0 vs. R264A F50	-6.2	No	ns	0.5843			Exact or approximate P value?	Exact		R264A F0 vs. R264A F50	-2.8	No	ns	>0,9999
								P value summary	ns
	Test details	Mean rank 1	Mean rank 2	Mean rank diff,	n1			Significantly different (P < 0.05)?	No		Test details	Mean rank 1	Mean rank 2	Mean rank diff,	n1
	WT-F0 vs. WT F50	5.8	16	-10.2	5			One- or two-tailed P value?	Two-tailed		WT-F0 vs. WT F50	7.2	17.4	-10.2	5
	WT-F0 vs. R264A F0	5.8	7	-1.2	5			Sum of ranks in column D,E	18 , 18		WT-F0 vs. R264A F0	7.2	7.3	-0.1	5
	WT-F0 vs. R264A F50	5.8	13.2	-7.4	5			Mann-Whitney U	8		WT-F0 vs. R264A F50	7.2	10.1	-2.9	5
	WT F50 vs. R264A F0	16	7	9	5						WT F50 vs. R264A F0	17.4	7.3	10.1	5
	WT F50 vs. R264A F50	16	13.2	2.8	5			Difference between medians			WT F50 vs. R264A F50	17.4	10.1	7.3	5
	R264A F0 vs. R264A F50	7	13.2	-6.2	5			Median of column D	0,1550, n=4		R264A F0 vs. R264A F50	7.3	10.1	-2.8	5
								Median of column E	0,1485, n=4
								Difference: Actual	-0.0065
								Difference: Hodges-Lehmann	-6.939e-18
	Figure 5 G						Figure 5 H				Figure 5 I
	Flow -	flow +	Flow -	flow +							Flow -	flow +	Flow -	flow +
	WT	AF2-ERα	WT	AF2-ERα			WT	C451A-ERα			WT	AF2-ERα	WT	AF2-ERα
	0.453922	0.684055	0.362549	0.875559			0.483867	0.495457			0.61	2.40006	0.75	2.3276
	0.60124	0.900439	0.620156	1.01704			0.470346	0.41566			0.88	1.41588	0.54	1.80907
	0.501963	1.39503	0.553322	1.03709			0.388299	0.279405			1.15	1.39536	1.12	1.90619
	0.246882	1.16807	0.456322	0.987776			0.472461	0.699416			0.76	1.20553	1.013	1.56709
			0.601655	0.811224				0.653959					0.97	0.943451
				0.650527				0.696298					0.89	1.64241
				0.756214
				1.1237
				1.05692
	Kruskal-Wallis							Mann-Withney			Kruskal-Wallis
	Dunn's multiple comparisons test	Mean rank diff,	Significant?	Summary	Adjusted P Value			Column B	AF2		Dunn's multiple comparisons test	Mean rank diff,	Significant?	Summary	Adjusted P Value
	WT F0 vs. WT F50	-13.25	Yes	*	0.0234			vs.	vs,		WT F0 vs. WT F50	-9.25	No	ns	0.1143
	WT F0 vs. AF2 F0	-1.8	No	ns	>0,9999			Column A	WT		WT F0 vs. AF2 F0	-0.6667	No	ns	>0,9999
	WT F0 vs. AF2 F50	-11.44	Yes	*	0.0202						WT F0 vs. AF2 F50	-9.833	No	ns	0.0601
	WT F50 vs. AF2 F0	11.45	No	ns	0.0515			Mann Whitney test			WT F50 vs. AF2 F0	8.583	No	ns	0.1476
	WT F50 vs. AF2 F50	1.806	No	ns	>0,9999			P value	0.3524		WT F50 vs. AF2 F50	-0.5833	No	ns	>0,9999
	AF2 F0 vs. AF2 F50	-9.644	Yes	*	0.0465			Exact or approximate P value?	Exact		AF2 F0 vs. AF2 F50	-9.167	Yes	*	0.0152
								P value summary	ns
	Test details	Mean rank 1	Mean rank 2	Mean rank diff,	n1			Significantly different (P < 0.05)?	No		Test details	Mean rank 1	Mean rank 2	Mean rank diff,	n1
	WT F0 vs. WT F50	4	17.25	-13.25	4			One- or two-tailed P value?	Two-tailed		WT F0 vs. WT F50	5.5	14.75	-9.25	4
	WT F0 vs. AF2 F0	4	5.8	-1.8	4			Sum of ranks in column A,B	17 , 38		WT F0 vs. AF2 F0	5.5	6.167	-0.6667	4
	WT F0 vs. AF2 F50	4	15.44	-11.44	4			Mann-Whitney U	7		WT F0 vs. AF2 F50	5.5	15.33	-9.833	4
	WT F50 vs. AF2 F0	17.25	5.8	11.45	4						WT F50 vs. AF2 F0	14.75	6.167	8.583	4
	WT F50 vs. AF2 F50	17.25	15.44	1.806	4			Difference between medians			WT F50 vs. AF2 F50	14.75	15.33	-0.5833	4
	AF2 F0 vs. AF2 F50	5.8	15.44	-9.644	5			Median of column A	0,4714, n=4		AF2 F0 vs. AF2 F50	6.167	15.33	-9.167	6
								Median of column B	0,5747, n=6
								Difference: Actual	0.1033
								Difference: Hodges-Lehmann	0.1386
