# Supplementary material for: Membrane estrogen receptor alpha (ERα) participates in flow-mediated dilation in a ligand-independent manner
Source: eLife journal article supplement (doi:10.7554/elife.68695), 2021-11-29
Supplement: supp [file elife-68695-supp-v1.zip › elife_poa_e68695_Figure_6_source_data_1.xlsx]

## Sheet: Feuil1
	Data and statistical analysis from experiments plotted in Figure 6B to F
	Figure 6 B
	FLOW	% increase in pressure			WT mice						FLOW	% increase in pressure			C451A-Era mice
	0.2	0	0	0	0	0	0	0	0		0.2	0	0	0	0	0
	0.3	6.93	2.7	3.7	4.97	0	3.97	9.43	4.37		0.3	3.09	3.03	3.91	3.11	18.77
	0.4	0.52	3.74	7.22	10.16	1.46	6.62	10.76	8.46		0.4	7.89	5.15	8.7	5.03	20.69
	0.5	1.66	8.05	9.82	15.37	6.44	9.58	11.38	12.73		0.5	14.18	7.23	14.36	13.74	24.61
	0.6	4.18	9.14	12.55	19.68	11.49	11.01	12.89	15.56		0.6	22.48	19.36	19	24.95	28.48
	0.7	11.47	9.84	13.61	25.47	17.16	14.15	19.31	19.12		0.7	27.59	22.01	24.9	37.53	31.95
	0.8	11.67	10.18	15.31	28.1	22.25	16.14	24.91	21.49		0.8	32.16	23.05	29.02	52.23	35.13
	0.9	19.05	10.56	15.93	29.69	27.24	18.88	31.22	23.86		0.9	34.83	25.14	33.71	63.78	39.52
	1	24.05	11.6	17.33	30.37	31.59	21.41	35.58	25.78		1	42.87	28.02	38.3	72.06	43.65
	Two-way RM ANOVA	Matching: Stacked
	Assume sphericity?	No
	Alpha	0.05
	Source of Variation	% of total variation	P value	P value summary	Significant?
	Flow x Column Factor	4.376	0.0008	***	Yes
	Flow	52.98	<0,0001	****	Yes
	Column Factor	18.16	0.0308	*	Yes
	Subject	18.44	<0,0001	****	Yes
	ANOVA table	SS	DF	MS	F (DFn, DFd)
	Flow x Column Factor	1255	8	156.8	F (8, 96) = 5,657
	Flow	15190	8	1899	F (1,450, 17,40) = 68,49
	Column Factor	5206	1	5206	F (1, 12) = 11,82
	Subject	5287	12	440.6	F (12, 96) = 15,89
	Residual	2661	96	27.72
	Difference between column means
	Mean of WT	12.65
	Mean of C451A-ERα	25.64
	Difference between means	-12.99
	SE of difference	3.779
	95% CI of difference	-21,22 to -4,756
	Number of missing values	0
	Figure 6 C				Figure 6 D					Figure 6 E					Figure 6 F
	WT	C451A-ERa			WT	C451A-ERa			WT	C451A-ERa				WT	C451A-ERa
	79.25	36.82			8.5271	2.25008			0.5652	0.5559				1.37	1.43
	66.98	66.83			2.71927	2.98006			0.5706	0.5477				1.28	1.43
	58.84	43.27			3.64406	1.81278			0.587	0.5501				1.32	1.31
	43.33	54.98			5.05396	3.38797			0.6155	0.5337				1.28	1.59
	33.76	69.21			6.26725	1.46611			0.5624	0.5321				1.21	1.41
		95
	Mann Withney test				Mann Withney test				Mann Withney test					Mann Withney test
	Column B	C451A			Column B	C451A -WT			Column B	WT				Column B	WT
	vs.	vs,			vs.	vs,			vs.	vs,				vs.	vs,
	Column A	WT			Column A	C451A -ERα			Column A	C451A				Column A	C451A
	Mann Whitney test				Mann Whitney test				Mann Whitney test					Mann Whitney test
	P value	0.9307			P value	0.0317			P value	0.0079				P value	0.0317
	Exact or approximate P value?	Exact			Exact or approximate P value?	Exact			Exact or approximate P value?	Exact				Exact or approximate P value?	Exact
	P value summary	ns			P value summary	*			P value summary	**				P value summary	*
	Significantly different (P < 0.05)?	No			Significantly different (P < 0.05)?	Yes			Significantly different (P < 0.05)?	Yes				Significantly different (P < 0.05)?	Yes
	One- or two-tailed P value?	Two-tailed			One- or two-tailed P value?	Two-tailed			One- or two-tailed P value?	Two-tailed				One- or two-tailed P value?	Two-tailed
	Sum of ranks in column A,B	29 , 37			Sum of ranks in column A,B	38 , 17			Sum of ranks in column A,B	15 , 40				Sum of ranks in column A,B	38 , 17
	Mann-Whitney U	14			Mann-Whitney U	2			Mann-Whitney U	0				Mann-Whitney U	2
	Difference between medians				Difference between medians				Difference between medians					Difference between medians
	Median of column A	58,84, n=5			Median of column A	5,054, n=5			Median of column A	0,5477, n=5				Median of column A	1,430, n=5
	Median of column B	60,91, n=6			Median of column B	2,250, n=5			Median of column B	0,5869, n=5				Median of column B	1,280, n=5
	Difference: Actual	2.065			Difference: Actual	-2.804			Difference: Actual	0.03917				Difference: Actual	-0.15
	Difference: Hodges-Lehmann	2.645			Difference: Hodges-Lehmann	-2.804			Difference: Hodges-Lehmann	0.04555				Difference: Hodges-Lehmann	-0.13
