# Supplementary material for: Membrane estrogen receptor alpha (ERα) participates in flow-mediated dilation in a ligand-independent manner
Source: eLife journal article supplement (doi:10.7554/elife.68695), 2021-11-29
Supplement: supp [file elife-68695-supp-v1.zip › elife_poa_e68695_Figure_7_figure_supplement_1.pdf]

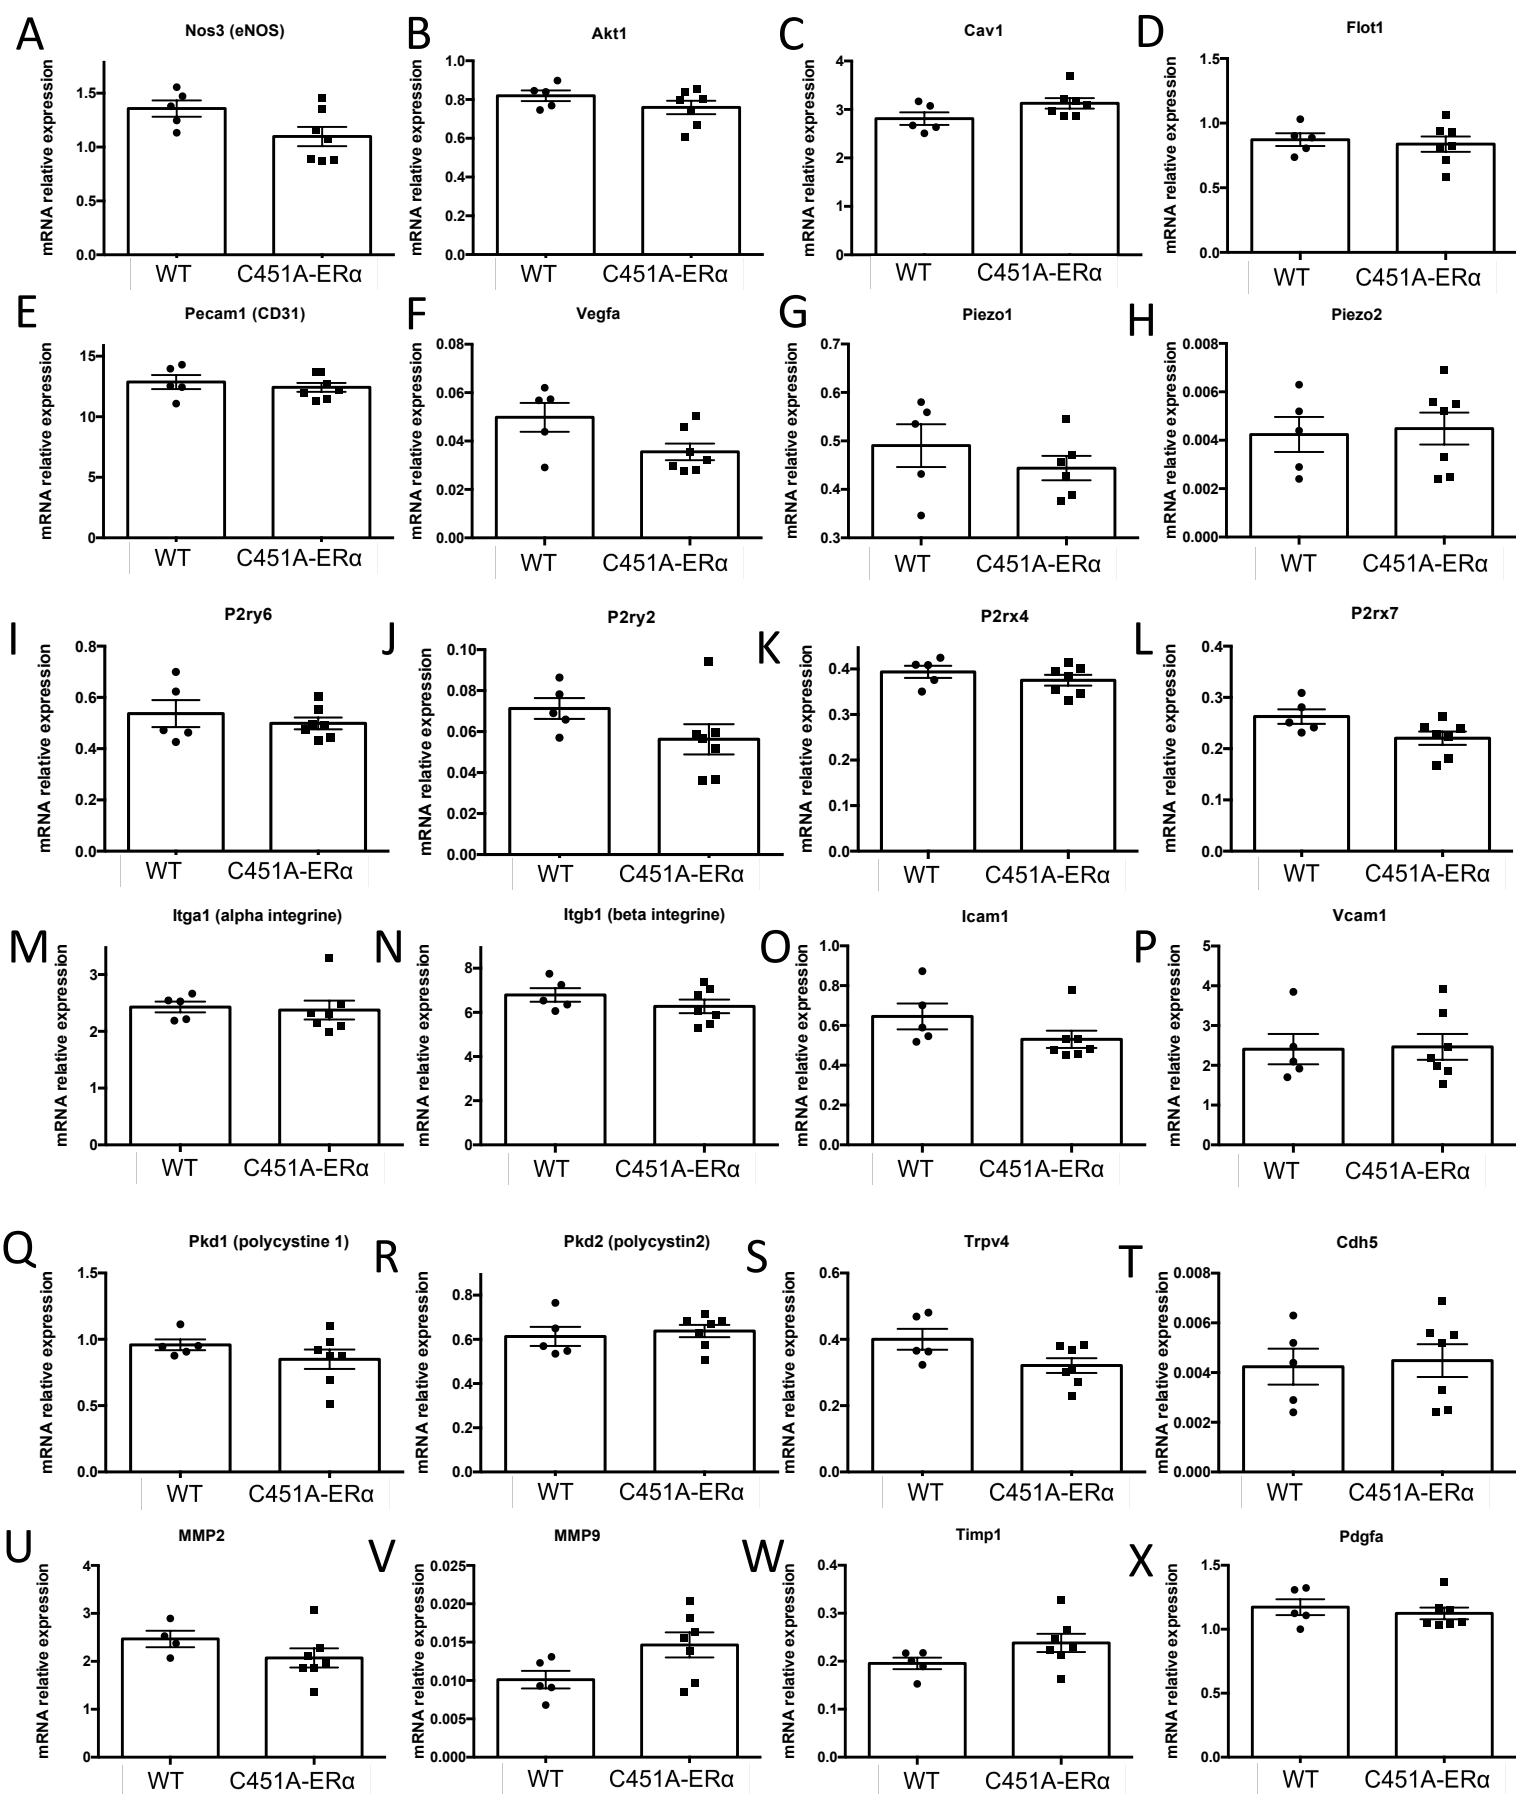

**Figure 7: figure supplement 1: Gene expression profile in the mesenteric isolated from mice lacking membrane-ER $\alpha$**

RT-qPCR gene expression analysis of mesenteric resistance arteries isolated from male C451A-ER $\alpha$  and WT mice. Means  $\pm$  SEM are shown (n=5 WT and 7 C451A-ER $\alpha$  mice per group).

NS, two-tailed Mann-Whitney test, C451A-ER $\alpha$  versus WT mice.
