# Supplementary material for: Membrane estrogen receptor alpha (ERα) participates in flow-mediated dilation in a ligand-independent manner
Source: eLife journal article supplement (doi:10.7554/elife.68695), 2021-11-29
Supplement: supp [file elife-68695-supp-v1.zip › elife_poa_e68695_Figure_7_source_data_1.xlsx]

## Sheet: Feuil1
	Data and statistical analysis from experiments plotted in Figure 7A to L
	Figure 7 panel A
	FLOW	% dilation	WT + SOD-catalase			FLOW	% dilation	WT
	3	0	0	0		3	0	0	0	0	0	0	0	0
	6	8.13008	21.9178	3.57143		6	7.2	10.3279	39.6396	14.4444	7.56302	19.4444	2.08333	25
	9	12.1951	42.4657	15		9	35.2	35.2459	70.2703	37.7778	17.6471	33.3333	22.9167	37.5
	15	35.4472	56.1644	22.8571		15	44	49.1803	84.6847	58.8889	27.7311	52.7778	52.0833	51.25
	21	69.1057	61.6438	37.1429		21	56.8	46.7213	105.405	72.2222	37.8151	62.5	58.3333	62.5
	30	70.6504	61.6438	44.2857		30	57.6	45.082	79.2793	83.3333	36.9748	75	52.0833	55
	50	73.1707	47.9452	65.7143		50	53.6	31.1475	69.3694	74.4444	33.6135	62.5	46.6667	50
	Two-way RM ANOVA	Matching: Stacked
	Assume sphericity?	No
	Alpha	0.05
	Source of Variation	% of total variation	P value	P value summary	Significant?
	Time x Column Factor	1.671	0.1807	ns	No
	Time	57.58	<0,0001	****	Yes
	Column Factor	0.5626	0.5887	ns	No
	Subject	16.11	<0,0001	****	Yes
	ANOVA table	SS	DF	MS	F (DFn, DFd)	P value
	Time x Column Factor	880.3	6	146.7	F (6, 54) = 1,547	P=0,1807
	Time	30335	6	5056	F (6, 54) = 53,31	P<0,0001
	Column Factor	296.4	1	296.4	F (1, 9) = 0,3143	P=0,5887
	Subject	8488	9	943.1	F (9, 54) = 9,945	P<0,0001
	Residual	5121	54	94.83
	Difference between column means
	Mean of c451a++	40.07
	Mean of SOD-PEG + catalase c451a++	35.67
	Difference between means	4.406
	SE of difference	7.858
	95% CI of difference	-13,37 to 22,18
	Number of missing values	0
	Figure 7 panel B
	FLOW	% dilation	C451A-ERα + SOD-catalase				FLOW	% dilation			C451A-ERα
	3	0	0	0	0		3	0	0	0	0	0	0	0	0	0
	6	7.40741	4.0404	7.36196	10		6	4.54545	3.52941	16.8421	11.5044	0.090909	4.15929	1.91781	0.246377	6.08696
	9	12.5926	16.101	33.865	25.6757		9	15.2525	12.6891	28.4211	15.9292	20.2597	15.6637	4.24657	11.5942	11.7391
	15	26.7407	31.3131	50.7976	51.0811		15	22.8283	19.3277	53.6842	26.5487	41.5584	32.4779	10.137	18.8406	28.6957
	21	34.4444	59.1919	71.411	56.7568		21	40.9091	15.9664	53.6842	38.0531	58.4416	36.9027	36.9863	20.2899	45.2174
	30	43.3333	61.2121	88.957	62.4324		30	45.9596	12.605	42.6316	31.8584	63.6364	46.9027	36.9863	20.2899	46.087
	50	44.8148	67.1717	80.9816	53.5135		50	48.9899	8.40336	32.6316	25.6637	57.1429	44.2478	30.137	11.5942	46.9565
	Two-way RM ANOVA	Matching: Stacked
	Assume sphericity?	No
	Alpha	0.05
	Source of Variation	% of total variation	P value	P value summary	Significant?
	Time x Column Factor	4.459	0.0009	***	Yes
	Time	66.14	<0,0001	****	Yes
	Column Factor	7.272	0.0321	*	Yes
	Subject	13.3	<0,0001	****	Yes
	ANOVA table	SS	DF	MS	F (DFn, DFd)	P value
	Time x Column Factor	1988	6	331.3	F (6, 66) = 4,349	P=0,0009
	Time	29485	6	4914	F (1,850, 20,35) = 64,51	P<0,0001
	Column Factor	3242	1	3242	F (1, 11) = 6,013	P=0,0321
	Subject	5930	11	539.1	F (11, 66) = 7,077	P<0,0001
	Residual	5028	66	76.18
	Difference between column means
	Mean of c451a --	22.83
	Mean of SOD-PEG + catalase c451a--	35.76
	Difference between means	-12.93
	SE of difference	5.274
	95% CI of difference	-24,54 to -1,325
	Number of missing values	0
	Figure 7 panel C
	FLOW	% dilation	WT + catalase						FLOW	% dilation			WT
	3	0	0	0	0	0	0		3	0	0	0	0	0	0	0	0
	6	15.1079	32.1127	10.8696	13.3858	14.2857	30.4878		6	7.2	10.3279	39.6396	14.4444	7.56302	19.4444	2.08333	25
	9	36.6906	59.7183	30.4348	23.6221	25.3968	40.2439		9	35.2	35.2459	70.2703	37.7778	17.6471	33.3333	22.9167	37.5
	15	38.1295	81.1268	28.2609	33.0709	34.9206	50		15	44	49.1803	84.6847	58.8889	27.7311	52.7778	52.0833	51.25
	21	37.4101	81.2676	39.1304	42.5197	42.8571	75.6098		21	56.8	46.7213	105.405	72.2222	37.8151	62.5	58.3333	62.5
	30	40.2878	93.9437	33.6957	51.9685	42.8571	82.9268		30	57.6	45.082	79.2793	83.3333	36.9748	75	52.0833	55
	50	31.6547	92.6761	44.5652	53.5433	50	75.6098		50	53.6	31.1475	69.3694	74.4444	33.6135	62.5	46.6667	50
	Two-way RM ANOVA	Matching: Stacked
	Assume sphericity?	No
	Alpha	0.05
	Source of Variation	% of total variation	P value	P value summary	Significant?
	Time x Column Factor	0.9881	0.2926	ns	No
	Time	63.95	<0,0001	****	Yes
	Column Factor	0.1081	0.817	ns	No
	Subject	23.17	<0,0001	****	Yes
	ANOVA table	SS	DF	MS	F (DFn, DFd)	P value
	Time x Column Factor	658.5	6	109.7	F (6, 72) = 1,248	P=0,2926
	Time	42617	6	7103	F (2,325, 27,90) = 80,75	P<0,0001
	Column Factor	72	1	72	F (1, 12) = 0,05596	P=0,8170
	Subject	15439	12	1287	F (12, 72) = 14,63	P<0,0001
	Residual	6333	72	87.96
	Difference between column means
	Mean of c451a++	40.07
	Mean of catalase c451a ++	38.34
	Difference between means	1.732
	SE of difference	7.322
	95% CI of difference	-14,22 to 17,68
	Number of missing values	0
	Figure 7 panel D
	FLOW	% dilation	C451A-ERα + catalase				FLOW	% dilation			C451A-ERα
	3	0	0	0	0		3	0	0	0	0	0	0	0	0	0
	6	7.40741	4.0404	7.36196	10		6	4.54545	3.52941	16.8421	11.5044	0.090909	4.15929	1.91781	0.246377	6.08696
	9	12.5926	16.101	33.865	25.6757		9	15.2525	12.6891	28.4211	15.9292	20.2597	15.6637	4.24657	11.5942	11.7391
	15	26.7407	31.3131	50.7976	51.0811		15	22.8283	19.3277	53.6842	26.5487	41.5584	32.4779	10.137	18.8406	28.6957
	21	34.4444	59.1919	71.411	56.7568		21	40.9091	15.9664	53.6842	38.0531	58.4416	36.9027	36.9863	20.2899	45.2174
	30	43.3333	61.2121	88.957	62.4324		30	45.9596	12.605	42.6316	31.8584	63.6364	46.9027	36.9863	20.2899	46.087
	50	44.8148	67.1717	80.9816	53.5135		50	48.9899	8.40336	32.6316	25.6637	57.1429	44.2478	30.137	11.5942	46.9565
	Two-way RM ANOVA	Matching: Stacked
	Assume sphericity?	Yes
	Alpha	0.05
	Source of Variation	% of total variation	P value	P value summary	Significant?
	Time x Column Factor	4.354	0.0036	**	Yes
	Time	45.21	<0,0001	****	Yes
	Column Factor	8.291	0.0311	*	Yes
	Subject	18.46	<0,0001	****	Yes
	ANOVA table	SS	DF	MS	F (DFn, DFd)	P value
	Time x Column Factor	1246	6	207.7	F (6, 78) = 3,557	P=0,0036
	Time	12943	6	2157	F (6, 78) = 36,94	P<0,0001
	Column Factor	2373	1	2373	F (1, 13) = 5,838	P=0,0311
	Subject	5285	13	406.5	F (13, 78) = 6,961	P<0,0001
	Residual	4555	78	58.4
	Difference between column means
	Mean of c451a --	22.83
	Mean of catalase c451a--	13.12
	Difference between means	9.705
	SE of difference	4.016
	95% CI of difference	1,028 to 18,38
	Number of missing values	0
	Figure 7 panel E
	FLOW	% dilation	WT + Mito-tempo			FLOW	% dilation			WT
	3	0	0	0		3	0	0	0	0	0	0	0	0
	6	14.2857	18.0556	11.7647		6	7.2	10.3279	39.6396	14.4444	7.56302	19.4444	2.08333	25
	9	24.4898	75	14.7059		9	35.2	35.2459	70.2703	37.7778	17.6471	33.3333	22.9167	37.5
	15	24.4898	87.5	23.5294		15	44	49.1803	84.6847	58.8889	27.7311	52.7778	52.0833	51.25
	21	36.7347	93.0556	28.4314		21	56.8	46.7213	105.405	72.2222	37.8151	62.5	58.3333	62.5
	30	38.3674	91.6667	40.1961		30	57.6	45.082	79.2793	83.3333	36.9748	75	52.0833	55
	50	34.0816	90.2778	24.5098		50	53.6	31.1475	69.3694	74.4444	33.6135	62.5	46.6667	50
	Two-way RM ANOVA	Matching: Stacked
	Assume sphericity?	No
	Alpha	0.05
	Source of Variation	% of total variation	P value	P value summary	Significant?
	Time x Column Factor	0.3902	0.9257	ns	No
	Time	45.62	<0,0001	****	Yes
	Column Factor	0.2924	0.7641	ns	No
	Subject	27.5	<0,0001	****	Yes
	ANOVA table	SS	DF	MS	F (DFn, DFd)	P value
	Time x Column Factor	229.2	6	38.21	F (6, 54) = 0,3163	P=0,9257
	Time	26801	6	4467	F (1,925, 17,32) = 36,98	P<0,0001
	Column Factor	171.8	1	171.8	F (1, 9) = 0,09570	P=0,7641
	Subject	16155	9	1795	F (9, 54) = 14,86	P<0,0001
	Residual	6523	54	120.8
	Difference between column means
	Mean of c451a++	40.07
	Mean of mitotempo c451a++	36.72
	Difference between means	3.354
	SE of difference	10.84
	95% CI of difference	-21,17 to 27,88
	Number of missing values	0
	Figure 7 panel F
	FLOW	% dilation	C451A-ERα + Mito-tempo					FLOW	% dilation			C451A-ERα
	3	0	0	0	0	0		3	0	0	0	0	0	0	0	0	0
	6	23.2353	23.9437	7	0	14.8515		6	4.54545	3.52941	16.8421	11.5044	0.090909	4.15929	1.91781	0.246377	6.08696
	9	43.8235	28.169	17	15.5556	19.802		9	15.2525	12.6891	28.4211	15.9292	20.2597	15.6637	4.24657	11.5942	11.7391
	15	73.5294	43.662	39	25.9259	22.7723		15	22.8283	19.3277	53.6842	26.5487	41.5584	32.4779	10.137	18.8406	28.6957
	21	67.6471	47.8873	69	40.7407	39.604		21	40.9091	15.9664	53.6842	38.0531	58.4416	36.9027	36.9863	20.2899	45.2174
	30	71.4706	50.9859	69	53.3333	38.6139		30	45.9596	12.605	42.6316	31.8584	63.6364	46.9027	36.9863	20.2899	46.087
	50	71.7647	53.8028	67	51.1111	31.6832		50	48.9899	8.40336	32.6316	25.6637	57.1429	44.2478	30.137	11.5942	46.9565
	Two-way RM ANOVA	Matching: Stacked
	Assume sphericity?	Yes
	Alpha	0.05
	Source of Variation	% of total variation	P value	P value summary	Significant?
	Time x Column Factor	2.07	0.0875	ns	No
	Time	62.91	<0,0001	****	Yes
	Column Factor	7.321	0.0354	*	Yes
	Subject	15.64	<0,0001	****	Yes
	ANOVA table	SS	DF	MS	F (DFn, DFd)	P value
	Time x Column Factor	929.3	6	154.9	F (6, 72) = 1,930	P=0,0875
	Time	28245	6	4707	F (6, 72) = 58,65	P<0,0001
	Column Factor	3287	1	3287	F (1, 12) = 5,617	P=0,0354
	Subject	7022	12	585.2	F (12, 72) = 7,290	P<0,0001
	Residual	5779	72	80.26
	Difference between column means
	Mean of c451a --	22.83
	Mean of mitotempo c451a--	34.91
	Difference between means	-12.09
	SE of difference	5.1
	95% CI of difference	-23,20 to -0,9754
	Number of missing values	0
