# Supplementary material for: Membrane estrogen receptor alpha (ERα) participates in flow-mediated dilation in a ligand-independent manner
Source: eLife journal article supplement (doi:10.7554/elife.68695), 2021-11-29
Supplement: supp [file elife-68695-supp-v1.zip › elife_poa_e68695_Figure_7_source_data_2.xlsx]

## Sheet: Feuil1
Data from experiments plotted in Figure 7 supplement Figure 1 A to X and in Figure 7 supplement Figure 2 A to T
MRA samples	n° ARN	HPRT	Gusb	Gapdh	Moy G Ref			Nos3		Akt1		Cav1		flot1		Pecam1		Vegfa		piezo1		piezo2		p2ry2		p2ry6		P2rx4		p2rx7		itga1		itgb1		icam1		vcam1		pkd1 (polycystine1)		pkd2		trpv4		cdh5		MMP2
		Cp	Cp	Cp	hprt gusb gapdh				2(Ctref-Ctcible)		2(Ctref-Ctcible)		2(Ctref-Ctcible)		2(Ctref-Ctcible)		2(Ctref-Ctcible)		2(Ctref-Ctcible)		2(Ctref-Ctcible)		2(Ctref-Ctcible)		2(Ctref-Ctcible)		2(Ctref-Ctcible)		2(Ctref-Ctcible)		2(Ctref-Ctcible)		2(Ctref-Ctcible)		2(Ctref-Ctcible)		2(Ctref-Ctcible)		2(Ctref-Ctcible)		2(Ctref-Ctcible)		2(Ctref-Ctcible)		2(Ctref-Ctcible)		2(Ctref-Ctcible)		2(Ctref-Ctcible)
WT n°1	709	27.165	28.03	22.7675	25.9875			25.35	1.55563	26.24	0.839441	24.66	2.50967	26.3	0.805245	22.35	12.445	30.5	0.0438129	26.86	0.5462	33.81	0.00441767	29.52	0.0864195	26.67	0.623085	27.5	0.350503	27.98	0.251303	24.65	2.52713	23.13	7.24758	26.5	0.701007	23.71	4.84837	26.06	0.950989	26.61	0.649544	27.08	0.468948	25.69	1.22901	24.65	2.52713
WT n°2	721	26.82	27.605	22.8375	25.7542			25.29	1.37952	25.91	0.897614	24.09	3.16931	25.71	1.03109	21.95	13.9691	29.88	0.0572797	26.54	0.580017	33.35	0.00516924	29.43	0.0782463	26.27	0.699389	26.99	0.424597	27.45	0.308676	24.34	2.66506	22.8	7.74984	25.95	0.873068	24.45	2.46941	25.6	1.11278	26.14	0.765337	26.81	0.481019	25.14	1.53067	24.22	2.89621
WT n°3	725	27.005	27.625	22.435	25.6883			25.13	1.47257	26.11	0.746562	24.29	2.63597	26.13	0.736284	21.85	14.3039	29.7	0.0619966	26.9	0.43177	34.12	0.00289611	29.82	0.0570485	26.8	0.462759	26.98	0.408479	27.52	0.28094	24.54	2.21658	22.98	6.53566	26.45	0.589815	24.62	2.09701	25.77	0.944965	26.5	0.569723	27.15	0.363073	25.31	1.29984	24.64	2.06814
WT n°4	745	26.245	27.18	21.93	25.1183			24.8	1.24689	25.36	0.845768	23.7	2.67277	25.29	0.887816	21.47	12.5389	30.22	0.0291236	26.02	0.535268	33.83	0.00238521	29.28	0.0558745	26.2	0.472483	26.53	0.375877	27.23	0.23138	23.77	2.54618	22.45	6.35694	25.99	0.546515	24.35	1.7033	25.26	0.906471	26.02	0.535268	26.57	0.365599	24.85	1.20442	23.87	2.37567
WT n°5	753	27.19	27.82	22.7525	25.9208			25.74	1.13354	26.3	0.768882	24.3	3.07553	26.07	0.901771	22.45	11.0873	30.06	0.0567527	26.76	0.558966	33.23	0.00630553	29.98	0.0599886	27.15	0.426564	27.21	0.409187	27.97	0.241624	24.79	2.18985	23.32	6.06637	26.87	0.517932	24.98	1.91964	26.11	0.877112	26.79	0.547463	27.55	0.323275	25.61	1.24042	NA
	Mean	26.885	27.652	22.5445	25.6938				1.35763		0.819653		2.81265		0.872441		12.8688		0.0497931		0.530444		0.00423475		0.0675155		0.536856		0.393729		0.262784		2.42896		6.79128		0.645667		2.60755		0.958463		0.613467		0.400383		1.30087		2.46679
	SEM	0.173155	0.14086	0.168589	0.153727				0.0759522		0.0274513		0.13017		0.0496586		0.580186		0.00598498		0.0257674		0.000721373		0.00622187		0.0527499		0.0134099		0.0141449		0.0952362		0.30875		0.0648232		0.574104		0.0408488		0.0428667		0.0314253		0.0595531		0.153898
C451A n°1	185	27.57	28.325	23.4	26.4317			26	1.34879	26.66	0.85362	24.91	2.87123	26.71	0.824543	22.66	13.6579	31.47	0.0304306	27.6	0.444935	33.92	0.00556913	29.84	0.0941867	27.16	0.603601	27.77	0.395477	28.36	0.262733	24.71	3.29817	23.55	7.37001	26.79	0.780065	24.46	3.92221	26.46	0.980552	26.92	0.712848	27.82	0.382006	25.95	1.39636	24.81	3.0773
C451A n°2	188	26.775	28.105	22.77	25.8833			26.07	0.878633	26.6	0.608502	24.22	3.16748	26.66	0.583714	22.36	11.4982	31.07	0.0274573	27.11	0.427304	33.48	0.00516625	30.67	0.0362301	27.1	0.430276	27.48	0.33064	28.46	0.167628	24.82	2.08975	23.48	5.29024	26.93	0.484085	24.76	2.1785	26.84	0.515246	26.86	0.508152	27.55	0.31498	25.57	1.24258	25.44	1.35974
C451A n°3	689	27.165	27.965	23.135	26.0883			26.25	0.893992	26.67	0.668191	24.2	3.70207	26.18	0.938438	22.59	11.3006	31.05	0.0320915	27.45	0.389132	34.33	0.00330378	30.18	0.0586524	26.94	0.554144	27.58	0.355602	28.55	0.181537	24.88	2.31071	23.64	5.45785	27.16	0.475769	25.46	1.54578	26.28	0.875594	26.89	0.573686	28.21	0.229781	25.93	1.116	25.2	1.85104
C451A n°4	732	26.835	27.565	22.6575	25.6858			25.88	0.874078	26.01	0.79876	24.06	3.0862	25.6	1.0613	22.08	12.1749	30.85	0.0278889	27.1	0.375226	32.86	0.00692406	30.46	0.0365454	26.71	0.491694	27	0.402158	27.82	0.227799	24.7	1.98046	23.09	6.04538	26.84	0.449326	24.8	1.84783	25.55	1.09873	26.26	0.671674	27.57	0.2709	25.83	0.904902	24.71	1.96678
C451A n°5	746	26.78	27.655	22.4675	25.6342			25.09	1.45818	25.89	0.837503	24.11	2.87621	25.94	0.808975	21.86	13.6816	30.92	0.0256334	26.72	0.47112	33.13	0.00554025	29.78	0.0564911	26.71	0.474397	27.02	0.382668	27.7	0.238848	24.32	2.48659	22.81	7.08205	26.54	0.533724	24.34	2.45235	25.76	0.916475	26.18	0.684996	27.03	0.380025	25.3	1.26065	24.44	2.28813
C451A n°6	747	26.85	27.815	22.5325	25.7325			25.52	1.15869	26.05	0.802459	24.16	2.9742	26.21	0.718221	22.15	11.9795	31.02	0.0256038			34.45	0.00237559	30	0.0519224	26.75	0.493972	27.26	0.346878	27.78	0.241903	24.52	2.31739	22.97	6.78571	26.64	0.533108	24	3.32303	25.93	0.87206	26.28	0.684205	27.17	0.369207	25.58	1.11149	24.84	1.85639
C451A n°7	755	26.985	27.74	22.725	25.8167			25.71	1.07674	26.24	0.7457	24.13	3.21912	25.92	0.93088	22.15	12.6992	30.89	0.0297012	26.95	0.455861	34.47	0.00248363	29.88	0.0598156	26.99	0.443396	27.09	0.413703	27.98	0.22324	24.71	2.15348	23.26	5.88347	26.95	0.455861	24.83	1.9816	26.35	0.690956	26.48	0.631418	27.55	0.300756	25.67	1.10701	24.74	2.10916
		26.9943	27.8814	22.8125	25.8961		Mean		1.09844		0.759248		3.12807		0.83801		12.4274		0.0284009		0.427263		0.00448038		0.0562634		0.498783		0.375304		0.220527		2.37665		6.27353		0.530277		2.46447		0.849944		0.63814		0.321094		1.16271		2.07265
		0.109204	0.101129	0.127249	0.105767		SEM		0.089528		0.034385		0.10847		0.0594838		0.363794		0.000926676		0.014358		0.00066462		0.00734446		0.0231356		0.0117998		0.0128663		0.166063		0.306854		0.043537		0.323723		0.0726742		0.0276541		0.0222574		0.0587435		0.199548
[truncated: 46 more columns]
