# Supplementary material for: Membrane estrogen receptor alpha (ERα) participates in flow-mediated dilation in a ligand-independent manner
Source: eLife journal article supplement (doi:10.7554/elife.68695), 2021-11-29
Supplement: supp [file elife-68695-supp-v1.zip › elife_poa_e68695_Figure_7_source_data_3.xlsx]

## Sheet: Feuil1
	Data and statistical analysis from experiments plotted in Figure 7 supplement Figure 3 A to C
	Figure 7, supplement figure 1, panel A
	FLOW	% dilation	WT									FLOW	% dilation	WT	with GsMTx4
	3	0	0	0	0	0	0	0	0	0		3	0	0	0
	6	25	10.3279	39.6396	14.4444	7.56302	19.4444	7.2	2.08333	25		6	12.5	26.8966	8.57143
	9	37.5	35.2459	70.2703	37.7778	17.6471	33.3333	35.2	22.9167	37.5		9	11.25	32.4138	15.2381
	15	51.25	49.1803	84.6847	58.8889	27.7311	52.7778	44	52.0833	51.25		15	29.1667	54.1379	14.2857
	21	62.5	46.7213	105.405	72.2222	37.8151	62.5	56.8	58.3333	62.5		21	33.1667	55.0345	20
	30	55	45.082	79.2793	83.3333	36.9748	75	57.6	52.0833	55		30	38.75	53.6897	15.9048
	50	50	31.1475	69.3694	74.4444	33.6135	62.5	53.6	46.6667	50		50	32.5	52.4138	8.09524
	FLOW	% dilation	C451A-ERα									FLOW	% dilation	C451A-ERα	with GsMTx4
	3	0	0	0	0	0	0	0	0	0		3	0	0	0	0
	6	4.54545	13.5294	16.8421	11.5044	9.09091	14.1593	21.9178	7.24638	6.08696		6	7.07317	0	0	10
	9	15.2525	22.6891	48.4211	15.9292	30.2597	25.6637	34.2466	11.5942	11.7391		9	20.9756	2.05128	4.72973	15.5556
	15	22.8283	19.3277	53.6842	26.5487	41.5584	42.4779	30.137	18.8406	28.6957		15	28.5366	8.8718	18.1081	30.5556
	21	40.9091	15.9664	53.6842	38.0531	58.4416	46.9027	36.9863	20.2899	45.2174		21	26.5854	8.35897	22.2703	30
	30	45.9596	12.605	42.6316	31.8584	63.6364	46.9027	36.9863	20.2899	46.087		30	34.2516	7.51282	25.6757	26.6667
	50	48.9899	8.40336	32.6316	25.6637	57.1429	44.2478	30.137	11.5942	46.9565		50	22.4658	5.53846	22.4324	18.8889
	WT versus WT+ GsMTx4								C451A-ERα versus C451A-ERα+ GsMTx4
	Two-way RM ANOVA	Matching: Stacked							Two-way RM ANOVA	Matching: Stacked
	Alpha	0.05							Alpha	0.05
	Source of Variation	% of total variation	P value	P value summary	Significant?				Source of Variation	% of total variation	P value	P value summary	Significant?
	Interaction	3.641	0.0003	***	Yes				Interaction	2.449	0.1724	ns	No
	Flow	41.59	< 0,0001	****	Yes				Flow	36.35	< 0,0001	****	Yes
	Column Factor	9.055	0.043	*	Yes				Column Factor	9.643	0.0416	*	Yes
	Subjects (matching)	19.05	< 0,0001	****	Yes				Subjects (matching)	19.95	< 0,0001	****	Yes
	ANOVA table	SS	DF	MS	F (DFn, DFd)	P value			ANOVA table	SS	DF	MS	F (DFn, DFd)	P value
	Interaction	1978	6	329.6	F (6, 66) = 4,911	P = 0,0003			Interaction	643.9	6	107.3	F (6, 66) = 1,561	P = 0,1724
	Flow	22591	6	3765	F (6, 66) = 56,10	P < 0,0001			Flow	9557	6	1593	F (6, 66) = 23,17	P < 0,0001
	Column Factor	4919	1	4919	F (1, 11) = 5,230	P = 0,0430			Column Factor	2535	1	2535	F (1, 11) = 5,318	P = 0,0416
	Subjects (matching)	10347	11	940.6	F (11, 66) = 14,01	P < 0,0001			Subjects (matching)	5244	11	476.8	F (11, 66) = 6,936	P < 0,0001
	Residual	4430	66	67.12					Residual	4536	66	68.73
	Number of missing values	0							Number of missing values	0
	Point by point comparison of the 4 groups:
	Bonferroni's multiple comparisons test		Mean Diff,	95% CI of diff,	Significant?	Summary		Bonferroni's multiple comparisons test		Mean Diff,	95% CI of diff,	Significant?	Summary
	Row 1							Row 5
	WT vs. C451A-ERa		0	-15,91 to 15,91	No	ns		WT vs. C451A-ERa		23.15	7,239 to 39,06	Yes	***
	WT vs. WT+GsMTx4		0	-20,28 to 20,28	No	ns		WT vs. WT+GsMTx4		27.67	7,392 to 47,96	Yes	**
	WT vs. C451A-ERa+GsMTx4		0	-20,28 to 20,28	No	ns		WT vs. C451A-ERa+GsMTx4		40.95	20,67 to 61,23	Yes	****
	C451A-ERa vs. WT+GsMTx4		0	-20,28 to 20,28	No	ns		C451A-ERa vs. WT+GsMTx4		4.524	-15,76 to 24,81	No	ns
	C451A-ERa vs. C451A-ERa+GsMTx4		0	-20,28 to 20,28	No	ns		C451A-ERa vs. C451A-ERa+GsMTx4		17.8	-2,480 to 38,08	No	ns
	WT+GsMTx4 vs. C451A-ERa+GsMTx4		0	-23,87 to 23,87	No	ns		WT+GsMTx4 vs. C451A-ERa+GsMTx4		13.28	-10,59 to 37,14	No	ns
	Row 2							Row 6
	WT vs. C451A-ERa		5.087	-10,82 to 21,00	No	ns		WT vs. C451A-ERa		21.38	5,467 to 37,29	Yes	**
	WT vs. WT+GsMTx4		1.567	-18,72 to 21,85	No	ns		WT vs. WT+GsMTx4		24.53	4,251 to 44,82	Yes	**
	WT vs. C451A-ERa+GsMTx4		12.48	-7,806 to 32,76	No	ns		WT vs. C451A-ERa+GsMTx4		36.4	16,12 to 56,68	Yes	****
	C451A-ERa vs. WT+GsMTx4		-3.52	-23,80 to 16,76	No	ns		C451A-ERa vs. WT+GsMTx4		3.156	-17,13 to 23,44	No	ns
	C451A-ERa vs. C451A-ERa+GsMTx4		7.39	-12,89 to 27,67	No	ns		C451A-ERa vs. C451A-ERa+GsMTx4		15.02	-5,258 to 35,31	Yes	*
	WT+GsMTx4 vs. C451A-ERa+GsMTx4		10.91	-12,96 to 34,78	No	ns		WT+GsMTx4 vs. C451A-ERa+GsMTx4		11.87	-12,00 to 35,73	No	ns
	Row 3							Row 7
	WT vs. C451A-ERa		12.4	-3,511 to 28,31	No	ns		WT vs. C451A-ERa		18.4	2,487 to 34,31	Yes	*
	WT vs. WT+GsMTx4		17.04	-3,239 to 37,33	No	ns		WT vs. WT+GsMTx4		21.33	1,044 to 41,61	Yes	*
	WT vs. C451A-ERa+GsMTx4		25.55	5,267 to 45,83	Yes	**		WT vs. C451A-ERa+GsMTx4		35.04	14,76 to 55,32	Yes	****
	C451A-ERa vs. WT+GsMTx4		4.644	-15,64 to 24,93	No	ns		C451A-ERa vs. WT+GsMTx4		2.929	-17,35 to 23,21	No	ns
	C451A-ERa vs. C451A-ERa+GsMTx4		13.15	-7,133 to 33,43	No	ns		C451A-ERa vs. C451A-ERa+GsMTx4		19.64	-3,639 to 36,92	Yes	*
	WT+GsMTx4 vs. C451A-ERa+GsMTx4		8.505	-15,36 to 32,37	No	ns		WT+GsMTx4 vs. C451A-ERa+GsMTx4		13.71	-10,15 to 37,58	No	ns
	Row 4
	WT vs. C451A-ERa		20.86	4,950 to 36,77	Yes	**
	WT vs. WT+GsMTx4		19.37	-0,9158 to 39,65	No	ns
	WT vs. C451A-ERa+GsMTx4		30.91	10,63 to 51,19	Yes	***
	C451A-ERa vs. WT+GsMTx4		-1.495	-21,78 to 18,79	No	ns
	C451A-ERa vs. C451A-ERa+GsMTx4		10.05	-10,23 to 30,33	No	ns
	WT+GsMTx4 vs. C451A-ERa+GsMTx4		11.54	-12,32 to 35,41	No	ns
	Figure 7, supplement figure 1, panel B
	Yoda1 (LogM)	% dilation	WT				Yoda1 (LogM)	% dilation	C451A-ERα
	-8	6.75676	0	3.2			-9	17.5	2.08333	9.3412
	-7	25.6757	11.2149	17.45			-8	38.1944	18.125	29.76
	-6	63.9189	33.0841	47.9871			-7	53.4722	62.5	57.34
	Two-way RM ANOVA	Matching: Stacked
	Alpha	0.05
	Source of Variation	% of total variation	P value	P value summary	Significant?
	Interaction	0.1822	0.866	ns	No
	Yoda1	83.39	< 0,0001	****	Yes
	Column Factor	4.339	0.1933	ns	No
	Subjects (matching)	7.115	0.0962	ns	No
	ANOVA table	SS	DF	MS	F (DFn, DFd)	P value
	Interaction	14.57	2	7.285	F (2, 8) = 0,1465	P = 0,8660
	Yoda1	6668	2	3334	F (2, 8) = 67,05	P < 0,0001
	Column Factor	347	1	347	F (1, 4) = 2,439	P = 0,1933
	Subjects (matching)	568.9	4	142.2	F (4, 8) = 2,860	P = 0,0962
	Residual	397.8	8	49.72
	Number of missing values	0
	Figure 7, supplement figure 1, panel C
	ATP (LogM)	% dilation	WT				ATP (LogM)	% dilation	C451A-ERα
	-7	-1.22449	-1.28571	0.79646	4.59016		-7	-5.46512	7.33945
	-6	14.2857	33.5714	32.7434	86.8852		-6	15	24.7706
	-5	41.8367	42.8571	45.1327	108.197		-5	49.7674	38.3486
	-4.5	43.8775	42.8571	57.4336	103.279		-4.5	75.1163	56.422
	Two-way RM ANOVA	Matching: Stacked
	Alpha	0.05
	Source of Variation	% of total variation	P value	P value summary	Significant?
	Interaction	2.59	0.3991	ns	No
	ATP	51.42	< 0,0001	****	Yes
	Column Factor	1.562	0.6611	ns	No
	Subjects (matching)	27.96	0.0016	**	Yes
	ANOVA table	SS	DF	MS	F (DFn, DFd)	P value
	Interaction	613.3	3	204.4	F (3, 12) = 1,068	P = 0,3991
	ATP	12178	3	4059	F (3, 12) = 21,20	P < 0,0001
	Column Factor	369.8	1	369.8	F (1, 4) = 0,2234	P = 0,6611
	Subjects (matching)	6621	4	1655	F (4, 12) = 8,647	P = 0,0016
	Residual	2297	12	191.4
	Number of missing values	0
