# Supplementary material for: Membrane estrogen receptor alpha (ERα) participates in flow-mediated dilation in a ligand-independent manner
Source: eLife journal article supplement (doi:10.7554/elife.68695), 2021-11-29
Supplement: supp [file elife-68695-supp-v1.zip › elife_poa_e68695_Figure_8_source_data_1.xlsx]

## Sheet: Feuil1
	Data and statistical analysis from experiments plotted in Figure 8A to L
	Figure 6 A
	FLOW	% dilation			WT mice		FLOW	% dilation			C451A-Era mice
	3	0	0	0	0		3	0	0	0	0	0	0
	6	6.95665	10.651	4.82696	7.39327		6	12	27.6119	-1.79054	16.5773	1.2289	6.14583
	9	12.4021	23.8021	14.006	28.9368		9	33.3014	15.6716	6.98198	30.5895	8.76365	15.9375
	15	22.935	43.3854	19.6916	42.1839		15	41.0284	34.3284	13.6712	39.191	8.9995	22.6273
	21	33.993	56.6927	28.8577	48.2718		21	49.7482	52.2388	19.7072	57.5903	15.5536	25.2778
	30	37.2947	62.6042	32.4421	49.9179		30	56.6702	64.1791	23.2432	62.9332	18.8121	24.9653
	50	38.899	74.8698	30.8548	59.3596		50	58.5319	63.4328	29.0428	67.3203	23.3801	22.6505
	Two-way RM ANOVA	Matching: Stacked
	Assume sphericity?	Yes
	Alpha	0.05
	Source of Variation	% of total variation	P value	P value summary	Significant?
	Flow x C451A	0.6795	0.6848	ns	No
	Flow	48.46	<0,0001	****	Yes
	C451A	0.6963	0.7235	ns	No
	Subject	41.49	<0,0001	****	Yes
	ANOVA table	SS	DF	MS	F (DFn, DFd)	P value
	Flow x C451A	152.8	5	30.55	F (5, 40) = 0,6206	P=0,6848
	Flow	10895	5	2179	F (5, 40) = 44,26	P<0,0001
	C451A	156.6	1	156.6	F (1, 8) = 0,1343	P=0,7235
	Subject	9327	8	1166	F (8, 40) = 23,68	P<0,0001
	Residual	1969	40	49.23
	Difference between column means
	Mean of C451A +/+	32.97
	Mean of C451A -/-	29.67
	Difference between means	3.297
	SE of difference	8.998
	95% CI of difference	-17,45 to 24,05
	Number of missing values	0
	Figure 6 B				Figure 6 C				Figure 6 D				Figure 6 E				Figure 6 F
	WT	C451A-ERa			WT	C451A-ERa			WT	C451A-ERa			WT	C451A-ERa			WT	C451A-ERa
	37.7	35.6			301.5	305.5			30.3998	46.5778			90.9293	93.3924			69.0475	64.4899
	30	33.3			283.5	285			50.5515	55.0133			87.6356	92.5644			88.2456	84.7009
	35	30.1			265	253.5			38.3454	43.1227			93.4387	85.087			70.2799	87.5306
	37.8	44.6			296.5	333.5			55.2578	46.6019			71.9119	81.8548			69.6296	81.9632
		37.6				335				53.5126				91.3396				65.223
		39.8				288				29.8363				87.8474
	Mann Withney test				Mann Withney test				Mann Withney test				Mann Withney test				Mann Withney test
	Column B	C451A			Column B	C451A			Column B	C451A			Column B	C451A			Column B	C451A
	vs.	vs,			vs.	vs,			vs.	vs,			vs.	vs,			vs.	vs,
	Column A	WT			Column A	WT			Column A	WT			Column A	WT			Column A	WT
	Mann Whitney test				Mann Whitney test				Mann Whitney test				Mann Whitney test				Mann Whitney test
	P value	0.7619			P value	0.4762			P value	>0,9999			P value	0.9143			P value	>0,9999
	Exact or approximate P value?	Exact			Exact or approximate P value?	Exact			Exact or approximate P value?	Exact			Exact or approximate P value?	Exact			Exact or approximate P value?	Exact
	P value summary	ns			P value summary	ns			P value summary	ns			P value summary	ns			P value summary	ns
	Significantly different (P < 0.05)?	No			Significantly different (P < 0.05)?	No			Significantly different (P < 0.05)?	No			Significantly different (P < 0.05)?	No			Significantly different (P < 0.05)?	No
	One- or two-tailed P value?	Two-tailed			One- or two-tailed P value?	Two-tailed			One- or two-tailed P value?	Two-tailed			One- or two-tailed P value?	Two-tailed			One- or two-tailed P value?	Two-tailed
	Sum of ranks in column A,B	20 , 35			Sum of ranks in column A,B	18 , 37			Sum of ranks in column A,B	22 , 33			Sum of ranks in column A,B	21 , 34			Sum of ranks in column A,B	22 , 33
	Mann-Whitney U	10			Mann-Whitney U	8			Mann-Whitney U	12			Mann-Whitney U	11			Mann-Whitney U	12
	Difference between medians				Difference between medians				Difference between medians				Difference between medians				Difference between medians
	Median of column A	36,35, n=4			Median of column A	290,0, n=4			Median of column A	44,45, n=4			Median of column A	89,28, n=4			Median of column A	69,95, n=4
	Median of column B	36,60, n=6			Median of column B	296,8, n=6			Median of column B	46,59, n=6			Median of column B	89,59, n=6			Median of column B	83,33, n=6
	Difference: Actual	0.25			Difference: Actual	6.75			Difference: Actual	2.141			Difference: Actual	0.311			Difference: Actual	13.38
	Difference: Hodges-Lehmann	1.3			Difference: Hodges-Lehmann	14.5			Difference: Hodges-Lehmann	1.358			Difference: Hodges-Lehmann	0.311			Difference: Hodges-Lehmann	5.484
	Figure 6 G
	FLOW	% dilation			WT mice			FLOW	% dilation			C451A-ERa mice
	3	0	0	0	0	0		3	0	0	0	0	0
	6	2.083	4.545	7.059	7.826	2.941		6	10.843	8.553	4.762	7.692	10.667
	9	8.333	13.03	20	10.87	10.219		9	17.47	13.816	13.605	10.49	17.961
	15	15.625	30.606	29.412	18.696	19.457		15	25.904	22.368	25.17	32.587	23.101
	21	19.271	31.364	38.824	19.13	24.493		21	24.699	26.316	23.129	40.49	23.295
	30	20.313	31.212	30.588	28.261	37.424		30	27.108	26.974	23.129	53.287	20.117
	50	24.479	24.242	36.471	27.391	39.313		50	27.711	26.974	19.728	51.888	20.548
	Two-way RM ANOVA	Matching: Stacked
	Alpha	0.05
	Source of Variation	% of total variation	P value	P value summary	Significant?
	Interaction	0.3693	0.9688	ns	No
	Flow	76.09	< 0,0001	****	Yes
	Column Factor	0.2746	0.6482	ns	No
	Subjects (matching)	9.778	0.0005	***	Yes
	ANOVA table	SS	DF	MS	F (DFn, DFd)	P value
	Interaction	42.26	6	7.044	F (6, 48) = 0,2191	P = 0,9688
	Flow	8708	6	1451	F (6, 48) = 45,14	P < 0,0001
	Column Factor	31.43	1	31.43	F (1, 8) = 0,2247	P = 0,6482
	Subjects (matching)	1119	8	139.9	F (8, 48) = 4,351	P = 0,0005
	Residual	1543	48	32.15
	Figure 6 H				Figure 6 I				Figure 6 J					Figure 6 K					Figure 6 L
	WT	C451A-ERa			WT	C451A-ERa			WT	C451A-ERa				WT	C451A-ERa				WT	C451A-ERa
	26	24			267	245			38	44				57	67				52	78
	32	27			321	278			43	76				67	99				66	95
	28	28			287	283			51	70				73	87				55	70
	25	29			252	291			65	42				96	73				89	41
	30	33			305	330			56	49				92	80				94	57
	Mann Withney test				Mann Withney test				Mann Withney test					Mann Withney test					Mann Withney test
	Column B	C451A			Column B	C451A			Column X	C451A				Column R	C451A				Column B	C451A
	vs.	vs,			vs.	vs,			vs.	vs,				vs.	vs,				vs.	vs,
	Column A	WT			Column A	WT			Column W	WT				Column Q	WT				Column A	WT
	Mann Whitney test				Mann Whitney test				Mann Whitney test					Mann Whitney test					Mann Whitney test
	P value	>0,9999			P value	>0,9999			P value	0.6905				P value	0.6667				P value	>0,9999
	Exact or approximate P value?	Exact			Exact or approximate P value?	Exact			Exact or approximate P value?	Exact				Exact or approximate P value?	Exact				Exact or approximate P value?	Exact
	P value summary	ns			P value summary	ns			P value summary	ns				P value summary	ns				P value summary	ns
	Significantly different (P < 0.05)?	No			Significantly different (P < 0.05)?	No			Significantly different (P < 0.05)?	No				Significantly different (P < 0.05)?	No				Significantly different (P < 0.05)?	No
	One- or two-tailed P value?	Two-tailed			One- or two-tailed P value?	Two-tailed			One- or two-tailed P value?	Two-tailed				One- or two-tailed P value?	Two-tailed				One- or two-tailed P value?	Two-tailed
	Sum of ranks in column A,B	27,50 , 27,50			Sum of ranks in column A,B	28 , 27			Sum of ranks in column W,X	30 , 25				Sum of ranks in column Q,R	30 , 25				Sum of ranks in column A,B	27 , 28
	Mann-Whitney U	12.5			Mann-Whitney U	12			Mann-Whitney U	10				Mann-Whitney U	10				Mann-Whitney U	12
	Difference between medians				Difference between medians				Difference between medians					Difference between medians					Difference between medians
	Median of column A	28,00, n=5			Median of column A	287,0, n=5			Median of column W	49,00, n=5				Median of column Q	80,00, n=5				Median of column A	66,00, n=5
	Median of column B	28,00, n=5			Median of column B	283,0, n=5			Median of column X	51,00, n=5				Median of column R	73,00, n=5				Median of column B	70,00, n=5
	Difference: Actual	0			Difference: Actual	-4			Difference: Actual	2				Difference: Actual	-7				Difference: Actual	4
	Difference: Hodges-Lehmann	0			Difference: Hodges-Lehmann	-4			Difference: Hodges-Lehmann	-5				Difference: Hodges-Lehmann	-6				Difference: Hodges-Lehmann	1
